# Supplementary material
Source: publisher site journal article supplement (https://www.spandidos-publications.com/7001/downloadSupplementary)
Supplement: Supplementary file 1 [file downloadSupplementary]

## Sheet: Sample information
Table SI. Raw data of microRNA sequencing.
#Sample_ID	Total_Reads	Q20%	Q30%	GC%	Group
AN1	11567400	99.03	96.78	54.4	age-related cataracts without high myopia
AN2	10302121	99.05	96.77	52.88	age-related cataracts without high myopia
AN3	9466545	98.72	96.03	53.95	age-related cataracts without high myopia
AH1	9979862	99.04	96.79	53.73	age-related cataracts with high myopia
AH2	9902493	98.72	95.68	54.1	age-related cataracts with high myopia
AH3	8542803	99.37	97.7	54.58	age-related cataracts with high myopia
YH1	10363068	98.87	96.36	53.72	young and high myopia
YH2	10550813	99	96.75	53.51	young and high myopia
YH3	16425694	98.65	95.82	54.01	young and high myopia

## Sheet: DEG AH v.s. AN
Symbol	row	baseMean	log2FoldChange	lfcSE	stat	pvalue	padj
hsa-miR-192-5p	hsa-miR-192-5p	441.79	1.0599	0.428931	2.47103	0.0134726	0.98079
hsa-miR-196a-5p	hsa-miR-196a-5p	14.3334	-2.81525	1.35752	-2.07382	0.0380965	0.98079
hsa-miR-205-5p	hsa-miR-205-5p	1671.16	-1.18534	0.502288	-2.35988	0.0182809	0.98079
hsa-miR-224-3p	hsa-miR-224-3p	9.83353	3.76515	1.71443	2.19615	0.0280809	0.98079
hsa-miR-127-3p	hsa-miR-127-3p	55.4472	-1.35366	0.683457	-1.98061	0.0476348	0.98079
hsa-miR-146a-3p	hsa-miR-146a-3p	5.42029	5.80045	2.19425	2.64347	0.00820609	0.98079
hsa-miR-195-3p	hsa-miR-195-3p	6.1413	-6.1809	2.15957	-2.8621	0.00420849	0.98079
hsa-miR-490-3p	hsa-miR-490-3p	4.10659	-5.61124	2.85358	-1.96638	0.0492542	0.98079
hsa-miR-493-5p	hsa-miR-493-5p	10.9175	-3.61397	1.61474	-2.23811	0.0252138	0.98079
hsa-miR-561-5p	hsa-miR-561-5p	9.82831	-3.31518	1.63298	-2.03014	0.0423425	0.98079
hsa-miR-549a-3p	hsa-miR-549a-3p	3.37397	5.11055	2.58967	1.97344	0.0484457	0.98079
hsa-miR-2113	hsa-miR-2113	3.92967	5.39036	2.72793	1.97599	0.0481561	0.98079
hsa-miR-1246	hsa-miR-1246	75.5764	-2.10612	0.96001	-2.19385	0.0282459	0.98079
hsa-miR-548o-3p	hsa-miR-548o-3p	22.0942	2.27785	1.15434	1.97329	0.048462	0.98079
hsa-miR-4423-3p	hsa-miR-4423-3p	5.27145	-5.93536	2.56412	-2.31478	0.0206252	0.98079
hsa-miR-4485-3p	hsa-miR-4485-3p	33.3448	5.66338	1.36035	4.16319	3.13827e-05	0.0204929
hsa-miR-6516-3p	hsa-miR-6516-3p	9.70225	-6.84944	2.48895	-2.75194	0.00592432	0.98079
hsa-miR-1843	hsa-miR-1843	4.92171	5.65297	2.26812	2.49236	0.0126898	0.98079

## Sheet: DEG YH v.s. AN
Symbol	row	baseMean	log2FoldChange	lfcSE	stat	pvalue	padj
hsa-miR-32-5p	hsa-miR-32-5p	38.6591	2.22419	0.901091	2.46833	0.0135745	0.627337
hsa-miR-7-1-3p	hsa-miR-7-1-3p	11.1351	-4.44363	1.68558	-2.63626	0.00838252	0.588
hsa-miR-203a-3p	hsa-miR-203a-3p	537.16	1.54628	0.637126	2.42696	0.015226	0.631126
hsa-miR-204-3p	hsa-miR-204-3p	604.779	-1.23627	0.462205	-2.67471	0.00747934	0.588
hsa-miR-214-5p	hsa-miR-214-5p	4.14429	-5.84463	2.78715	-2.09699	0.0359942	0.978129
hsa-miR-1-3p	hsa-miR-1-3p	881.992	-1.65484	0.495176	-3.34192	0.000832012	0.107662
hsa-miR-141-3p	hsa-miR-141-3p	65.6858	1.9588	0.761339	2.57283	0.010087	0.588
hsa-miR-142-3p	hsa-miR-142-3p	27.8769	-1.90852	0.961239	-1.98548	0.0470912	0.978129
hsa-miR-143-3p	hsa-miR-143-3p	9057.19	-2.36891	0.560846	-4.22381	2.40204e-05	0.0155412
hsa-miR-144-3p	hsa-miR-144-3p	568.374	-1.31945	0.545685	-2.41797	0.0156074	0.631126
hsa-miR-145-3p	hsa-miR-145-3p	152.526	-2.25302	0.634948	-3.54835	0.000387659	0.0916839
hsa-miR-362-3p	hsa-miR-362-3p	8.06858	-5.81196	1.92921	-3.01261	0.0025901	0.279299
hsa-miR-452-5p	hsa-miR-452-5p	31.7439	-2.71337	1.04495	-2.59664	0.00941407	0.588
hsa-miR-490-3p	hsa-miR-490-3p	4.69738	-6.01144	2.83022	-2.12402	0.0336688	0.978129
hsa-miR-503-5p	hsa-miR-503-5p	29.4602	-2.38005	1.12854	-2.10897	0.0349469	0.978129
hsa-miR-654-3p	hsa-miR-654-3p	18.0325	-3.1493	1.2371	-2.54571	0.0109057	0.588
hsa-miR-885-5p	hsa-miR-885-5p	9.18082	-6.97939	2.02477	-3.44701	0.000566825	0.0916839
hsa-miR-548e-3p	hsa-miR-548e-3p	8.63516	-6.89155	1.97823	-3.48369	0.000494555	0.0916839
hsa-miR-1908-5p	hsa-miR-1908-5p	19.4409	2.6196	1.19877	2.18523	0.0288717	0.978129
hsa-miR-3613-5p	hsa-miR-3613-5p	45.7571	-1.45644	0.741055	-1.96537	0.0493718	0.978129
hsa-miR-4423-3p	hsa-miR-4423-3p	6.00963	-6.33026	2.54849	-2.48393	0.0129942	0.627337
hsa-miR-4485-3p	hsa-miR-4485-3p	15.7155	4.34937	1.53413	2.83508	0.00458144	0.423456
hsa-miR-6510-3p	hsa-miR-6510-3p	5.13946	5.55523	2.60343	2.13381	0.0328583	0.978129

## Sheet: DEG AH v.s. YH
Symbol	row	baseMean	log2FoldChange	lfcSE	stat	pvalue	padj
hsa-miR-24-3p	hsa-miR-24-3p	579.135	1.21409	0.477669	2.54171	0.0110313	0.229527
hsa-miR-24-2-5p	hsa-miR-24-2-5p	4.46373	5.40944	2.54242	2.12768	0.033364	0.427059
hsa-miR-27a-3p	hsa-miR-27a-3p	1384.16	1.00373	0.396077	2.53417	0.0112714	0.229527
hsa-miR-196a-5p	hsa-miR-196a-5p	24.3909	3.32981	1.21122	2.74914	0.00597515	0.161791
hsa-miR-7-1-3p	hsa-miR-7-1-3p	17.2652	-5.03481	1.67916	-2.9984	0.00271398	0.0985582
hsa-miR-10b-5p	hsa-miR-10b-5p	1368.65	1.46044	0.489685	2.9824	0.00285995	0.0985582
hsa-miR-203a-3p	hsa-miR-203a-3p	553.573	1.81047	0.585493	3.09222	0.00198665	0.0900593
hsa-miR-204-5p	hsa-miR-204-5p	927.919	-1.23958	0.41125	-3.01418	0.00257673	0.0985582
hsa-miR-204-3p	hsa-miR-204-3p	752.795	-1.52676	0.470432	-3.24545	0.00117266	0.0809795
hsa-miR-205-5p	hsa-miR-205-5p	2358.38	1.45734	0.446082	3.26699	0.00108699	0.0809795
hsa-miR-214-5p	hsa-miR-214-5p	4.53234	-5.78635	2.90236	-1.99367	0.046188	0.496841
hsa-miR-215-5p	hsa-miR-215-5p	11.0901	-4.209	2.11496	-1.99011	0.0465789	0.496841
hsa-miR-200b-3p	hsa-miR-200b-3p	1927.1	1.43337	0.647186	2.21478	0.0267753	0.374854
hsa-miR-1-3p	hsa-miR-1-3p	980.713	-1.71461	0.631852	-2.71363	0.00665502	0.165636
hsa-miR-141-3p	hsa-miR-141-3p	64.2984	2.70429	0.825538	3.27579	0.00105365	0.0809795
hsa-miR-143-5p	hsa-miR-143-5p	47.4417	-3.55726	1.20526	-2.95144	0.00316294	0.0989324
hsa-miR-143-3p	hsa-miR-143-3p	10719.3	-2.53627	0.58696	-4.32102	1.55309e-05	0.00695784
hsa-miR-145-5p	hsa-miR-145-5p	120.831	-1.41224	0.611199	-2.31061	0.0208547	0.319218
hsa-miR-145-3p	hsa-miR-145-3p	174.578	-2.38276	0.73913	-3.22373	0.00126531	0.0809795
hsa-miR-9-3p	hsa-miR-9-3p	731.958	-1.63993	0.453841	-3.61345	0.000302146	0.0451205
hsa-miR-200c-3p	hsa-miR-200c-3p	1367.69	1.91842	0.621105	3.08871	0.00201025	0.0900593
hsa-miR-194-3p	hsa-miR-194-3p	4.63758	-5.84793	2.87032	-2.03738	0.0416117	0.49058
hsa-miR-200a-3p	hsa-miR-200a-3p	572.374	1.76637	0.74897	2.3584	0.0183538	0.304537
hsa-miR-362-5p	hsa-miR-362-5p	31.4123	1.97629	0.939292	2.10402	0.0353763	0.440239
hsa-miR-429	hsa-miR-429	293.42	1.78849	0.712604	2.50979	0.0120802	0.2353
hsa-miR-452-5p	hsa-miR-452-5p	31.639	-2.61162	0.984731	-2.65211	0.00799901	0.188608
hsa-miR-2113	hsa-miR-2113	4.86105	-5.99477	2.72354	-2.20109	0.0277296	0.37645
hsa-miR-885-5p	hsa-miR-885-5p	7.90377	-6.6309	2.09042	-3.17204	0.00151373	0.0847691
hsa-miR-1225-5p	hsa-miR-1225-5p	5.16254	-6.0811	2.64249	-2.30127	0.0213762	0.319218
hsa-miR-548e-3p	hsa-miR-548e-3p	10.7642	-7.05728	1.93631	-3.64471	0.000267696	0.0451205
hsa-miR-1247-3p	hsa-miR-1247-3p	5.03474	5.57683	2.78778	2.00046	0.045451	0.496841
hsa-miR-548o-3p	hsa-miR-548o-3p	26.9099	-2.42763	1.00205	-2.42268	0.0154066	0.276086
hsa-miR-1275	hsa-miR-1275	7.0256	5.13465	2.20228	2.33151	0.0197265	0.315624
hsa-miR-1277-5p	hsa-miR-1277-5p	5.82962	5.8256	2.57353	2.26366	0.0235948	0.340983
hsa-miR-664a-3p	hsa-miR-664a-3p	54.194	1.59874	0.796304	2.00771	0.0446744	0.496841
hsa-miR-3615	hsa-miR-3615	8.23927	-4.45125	1.86582	-2.38568	0.0170475	0.293741
hsa-miR-3912-3p	hsa-miR-3912-3p	6.98074	5.16129	2.03033	2.5421	0.0110189	0.229527
hsa-miR-4443	hsa-miR-4443	114.95	-1.7142	0.693104	-2.47321	0.0133904	0.249954
hsa-miR-203b-5p	hsa-miR-203b-5p	52.3724	2.33882	0.796289	2.93715	0.00331247	0.0989324
hsa-miR-4732-5p	hsa-miR-4732-5p	7.59473	-4.38794	2.11816	-2.07158	0.0383045	0.463794
hsa-miR-6516-3p	hsa-miR-6516-3p	4.62194	5.48101	2.54618	2.15264	0.0313473	0.413047
hsa-miR-1843	hsa-miR-1843	6.06717	-6.25061	2.28104	-2.74024	0.00613941	0.161791

## Sheet: 289 Target genes
mirnet	mir_id	mir_acc	symbol	embl	entrez	experiment	pmid	mirtarbase	tarbase	mirecords	tissue
mirnet-hsa-75341	hsa-mir-490-3p	MIMAT0002806	ABL2	ENSG00000143322	27	PAR-CLIP	21572407	1	0	0	Unspecified
mirnet-hsa-75342	hsa-mir-490-3p	MIMAT0002806	RHOA	ENSG00000067560	387	Immunohistochemistry//Luciferase reporter assay//Western blot	27524906	1	0	0	Unspecified
mirnet-hsa-75343	hsa-mir-490-3p	MIMAT0002806	ASPA	ENSG00000108381	443	PAR-CLIP	27292025	1	0	0	Unspecified
mirnet-hsa-75344	hsa-mir-490-3p	MIMAT0002806	CCND1	ENSG00000110092	595	Luciferase reporter assay//qRT-PCR//Western blot	24440705	1	0	0	Unspecified
mirnet-hsa-75345	hsa-mir-490-3p	MIMAT0002806	BMP3	ENSG00000152785	651	PAR-CLIP	27292025	1	0	0	Unspecified
mirnet-hsa-75346	hsa-mir-490-3p	MIMAT0002806	ENTPD5	ENSG00000187097	957	PAR-CLIP	21572407|20371350|26701625	1	0	0	Unspecified
mirnet-hsa-75347	hsa-mir-490-3p	MIMAT0002806	CDR1	ENSG00000184258	1038	PAR-CLIP	27292025	1	0	0	Unspecified
mirnet-hsa-75348	hsa-mir-490-3p	MIMAT0002806	ABCC2	ENSG00000023839	1244	Immunohistochemistry//Luciferase reporter assay//qRT-PCR//Western blot	28386339	1	0	0	Unspecified
mirnet-hsa-75349	hsa-mir-490-3p	MIMAT0002806	COL9A2	ENSG00000049089	1298	PAR-CLIP	27292025	1	0	0	Unspecified
mirnet-hsa-75350	hsa-mir-490-3p	MIMAT0002806	DFFA	ENSG00000160049	1676	PAR-CLIP	23446348	1	0	0	Unspecified
mirnet-hsa-75351	hsa-mir-490-3p	MIMAT0002806	ERN1	ENSG00000178607	2081	PAR-CLIP	22012620	1	1	0	Unspecified
mirnet-hsa-75352	hsa-mir-490-3p	MIMAT0002806	GNB2	ENSG00000172354	2783	PAR-CLIP	23592263	1	0	0	Unspecified
mirnet-hsa-75353	hsa-mir-490-3p	MIMAT0002806	GOLGA3	ENSG00000090615	2802	PAR-CLIP	27292025	1	0	0	Unspecified
mirnet-hsa-75354	hsa-mir-490-3p	MIMAT0002806	HIST1H2BD	ENSG00000158373	3017	PAR-CLIP	24398324|23446348	1	0	0	Unspecified
mirnet-hsa-75355	hsa-mir-490-3p	MIMAT0002806	HINT1	ENSG00000169567	3094	HITS-CLIP	23824327	1	0	0	Unspecified
mirnet-hsa-75356	hsa-mir-490-3p	MIMAT0002806	RBPJ	ENSG00000168214	3516	PAR-CLIP	20371350	1	0	0	Unspecified
mirnet-hsa-75357	hsa-mir-490-3p	MIMAT0002806	MICB	ENSG00000206449	4277	PAR-CLIP	26701625|27292025	1	0	0	Unspecified
mirnet-hsa-75358	hsa-mir-490-3p	MIMAT0002806	MAP3K9	ENSG00000006432	4293	PAR-CLIP	22012620|20371350|27292025	1	0	0	Unspecified
mirnet-hsa-75359	hsa-mir-490-3p	MIMAT0002806	MYH9	ENSG00000100345	4627	PAR-CLIP	22100165	1	0	0	Unspecified
mirnet-hsa-75360	hsa-mir-490-3p	MIMAT0002806	MYO5A	ENSG00000197535	4644	HITS-CLIP	23824327	1	0	0	Unspecified
mirnet-hsa-75361	hsa-mir-490-3p	MIMAT0002806	PAPPA	ENSG00000182752	5069	ChIP-seq//ELISA//Luciferase reporter assay//Microarray//qRT-PCR//Western blot	23821525	1	0	0	Unspecified
mirnet-hsa-75362	hsa-mir-490-3p	MIMAT0002806	PCBP1	ENSG00000169564	5093	Immunohistochemistry//Luciferase reporter assay//qRT-PCR//Western blot	27648147	1	0	0	Unspecified
mirnet-hsa-75363	hsa-mir-490-3p	MIMAT0002806	PCCB	ENSG00000114054	5096	PAR-CLIP	26701625	1	0	0	Unspecified
mirnet-hsa-75364	hsa-mir-490-3p	MIMAT0002806	PPIC	ENSG00000168938	5480	PAR-CLIP	23592263|20371350|26701625	1	0	0	Unspecified
mirnet-hsa-75365	hsa-mir-490-3p	MIMAT0002806	PRNP	ENSG00000171867	5621	PAR-CLIP	23446348|20371350	1	1	0	Unspecified
mirnet-hsa-75366	hsa-mir-490-3p	MIMAT0002806	QDPR	ENSG00000151552	5860	PAR-CLIP	23592263	1	0	0	Unspecified
mirnet-hsa-75367	hsa-mir-490-3p	MIMAT0002806	RAD51	ENSG00000051180	5888	PAR-CLIP	23446348	1	0	0	Unspecified
mirnet-hsa-75368	hsa-mir-490-3p	MIMAT0002806	RAP2B	ENSG00000181467	5912	PAR-CLIP	27292025	1	0	0	Unspecified
mirnet-hsa-75369	hsa-mir-490-3p	MIMAT0002806	RBMS2	ENSG00000076067	5939	PAR-CLIP	27292025	1	0	0	Unspecified
mirnet-hsa-75370	hsa-mir-490-3p	MIMAT0002806	RPL18A	ENSG00000105640	6142	PAR-CLIP	27292025	1	0	0	Unspecified
mirnet-hsa-75371	hsa-mir-490-3p	MIMAT0002806	SMARCD1	ENSG00000066117	6602	ChIP-seq//Luciferase reporter assay//Microarray//PAR-CLIP//qRT-PCR//Western blot	25503559|23592263|20371350|26701625	1	1	0	Unspecified
mirnet-hsa-75372	hsa-mir-490-3p	MIMAT0002806	SMS	ENSG00000102172	6611	HITS-CLIP//PAR-CLIP	23706177|26701625|27292025	1	0	0	Unspecified
mirnet-hsa-75373	hsa-mir-490-3p	MIMAT0002806	SNRPD3	ENSG00000100028	6634	PAR-CLIP	23592263	1	0	0	Unspecified
mirnet-hsa-75374	hsa-mir-490-3p	MIMAT0002806	SPAST	ENSG00000021574	6683	HITS-CLIP	23313552	1	0	0	Unspecified
mirnet-hsa-75375	hsa-mir-490-3p	MIMAT0002806	SRM	ENSG00000116649	6723	HITS-CLIP	23824327	1	0	0	Unspecified
mirnet-hsa-75376	hsa-mir-490-3p	MIMAT0002806	SUOX	ENSG00000139531	6821	PAR-CLIP	21572407	1	0	0	Unspecified
mirnet-hsa-75377	hsa-mir-490-3p	MIMAT0002806	TERF1	ENSG00000147601	7013	PAR-CLIP	26701625	1	0	0	Unspecified
mirnet-hsa-75378	hsa-mir-490-3p	MIMAT0002806	TGFA	ENSG00000163235	7039	Luciferase reporter assay	26843615	1	0	0	Unspecified
mirnet-hsa-75379	hsa-mir-490-3p	MIMAT0002806	TGFBR1	ENSG00000106799	7046	Luciferase reporter assay//Western blot	26714817	1	0	0	Unspecified
mirnet-hsa-75380	hsa-mir-490-3p	MIMAT0002806	TNNI1	ENSG00000159173	7135	PAR-CLIP	27292025	1	0	0	Unspecified
mirnet-hsa-75381	hsa-mir-490-3p	MIMAT0002806	CNBP	ENSG00000169714	7555	PAR-CLIP	21572407	1	1	0	Unspecified
mirnet-hsa-75382	hsa-mir-490-3p	MIMAT0002806	ZNF124	ENSG00000196418	7678	PAR-CLIP	27292025	1	0	0	Unspecified
mirnet-hsa-75383	hsa-mir-490-3p	MIMAT0002806	ZNF175	ENSG00000105497	7728	PAR-CLIP	26701625	1	0	0	Unspecified
mirnet-hsa-75384	hsa-mir-490-3p	MIMAT0002806	HMGA2	ENSG00000149948	8091	Luciferase reporter assay//qRT-PCR//Western blot	26341146	1	1	0	Unspecified
mirnet-hsa-75385	hsa-mir-490-3p	MIMAT0002806	CHST1	ENSG00000175264	8534	PAR-CLIP	26701625	1	0	0	Unspecified
mirnet-hsa-75386	hsa-mir-490-3p	MIMAT0002806	CDC14B	ENSG00000081377	8555	PAR-CLIP	23446348|27292025	1	0	0	Unspecified
mirnet-hsa-75387	hsa-mir-490-3p	MIMAT0002806	MTMR3	ENSG00000100330	8897	PAR-CLIP	20371350	1	0	0	Unspecified
mirnet-hsa-75388	hsa-mir-490-3p	MIMAT0002806	CBFA2T2	ENSG00000078699	9139	PAR-CLIP	27292025	1	0	0	Unspecified
mirnet-hsa-75389	hsa-mir-490-3p	MIMAT0002806	LPAR2	ENSG00000064547	9170	PAR-CLIP	27292025	1	0	0	Unspecified
mirnet-hsa-75390	hsa-mir-490-3p	MIMAT0002806	MYOM2	ENSG00000036448	9172	PAR-CLIP	27292025	1	0	0	Unspecified
mirnet-hsa-75391	hsa-mir-490-3p	MIMAT0002806	GCNT3	ENSG00000140297	9245	PAR-CLIP	27292025	1	0	0	Unspecified
mirnet-hsa-75392	hsa-mir-490-3p	MIMAT0002806	GLP2R	ENSG00000065325	9340	PAR-CLIP	27292025	1	0	0	Unspecified
mirnet-hsa-75393	hsa-mir-490-3p	MIMAT0002806	ARHGAP29	ENSG00000137962	9411	PAR-CLIP	27292025	1	0	0	Unspecified
mirnet-hsa-75394	hsa-mir-490-3p	MIMAT0002806	TMEM59	ENSG00000116209	9528	HITS-CLIP	23824327	1	0	0	Unspecified
mirnet-hsa-75395	hsa-mir-490-3p	MIMAT0002806	EI24	ENSG00000149547	9538	HITS-CLIP	27418678	1	0	0	Unspecified
mirnet-hsa-75396	hsa-mir-490-3p	MIMAT0002806	C14orf2	ENSG00000156411	9556	PAR-CLIP	23592263	1	0	0	Unspecified
mirnet-hsa-75397	hsa-mir-490-3p	MIMAT0002806	RAB36	ENSG00000100228	9609	HITS-CLIP	23824327	1	0	0	Unspecified
mirnet-hsa-75398	hsa-mir-490-3p	MIMAT0002806	GREB1	ENSG00000196208	9687	HITS-CLIP	23824327|19536157	1	0	0	Unspecified
mirnet-hsa-75399	hsa-mir-490-3p	MIMAT0002806	ULK2	ENSG00000083290	9706	PAR-CLIP	26701625|27292025	1	0	0	Unspecified
mirnet-hsa-75400	hsa-mir-490-3p	MIMAT0002806	PPP1R26	ENSG00000196422	9858	HITS-CLIP	19536157	1	0	0	Unspecified
mirnet-hsa-75401	hsa-mir-490-3p	MIMAT0002806	LRIG2	ENSG00000198799	9860	HITS-CLIP	23313552	1	1	0	Unspecified
mirnet-hsa-75402	hsa-mir-490-3p	MIMAT0002806	SLC35E2	ENSG00000215790	9906	PAR-CLIP	22100165|20371350|26701625	1	0	0	Unspecified
mirnet-hsa-75403	hsa-mir-490-3p	MIMAT0002806	COL4A3BP	ENSG00000113163	10087	PAR-CLIP	23446348	1	0	0	Unspecified
mirnet-hsa-75404	hsa-mir-490-3p	MIMAT0002806	RASA4	ENSG00000105808	10156	PAR-CLIP	27292025	1	0	0	Unspecified
mirnet-hsa-75405	hsa-mir-490-3p	MIMAT0002806	RBM7	ENSG00000076053	10179	PAR-CLIP	22100165	1	0	0	Unspecified
mirnet-hsa-75406	hsa-mir-490-3p	MIMAT0002806	PATJ	ENSG00000132849	10207	HITS-CLIP	23824327	1	0	0	Unspecified
mirnet-hsa-75407	hsa-mir-490-3p	MIMAT0002806	NFAT5	ENSG00000102908	10725	PAR-CLIP	27292025	1	0	0	Unspecified
mirnet-hsa-75408	hsa-mir-490-3p	MIMAT0002806	EBNA1BP2	ENSG00000117395	10969	PAR-CLIP	23446348	1	0	0	Unspecified
mirnet-hsa-75409	hsa-mir-490-3p	MIMAT0002806	LILRA2	ENSG00000278634	11027	HITS-CLIP//PAR-CLIP	23824327|26701625	1	0	0	Unspecified
mirnet-hsa-75410	hsa-mir-490-3p	MIMAT0002806	DDX19B	ENSG00000157349	11269	PAR-CLIP	27292025	1	0	0	Unspecified
mirnet-hsa-75411	hsa-mir-490-3p	MIMAT0002806	SCRG1	ENSG00000164106	11341	PAR-CLIP	27292025	1	0	0	Unspecified
mirnet-hsa-75412	hsa-mir-490-3p	MIMAT0002806	CDK19	ENSG00000155111	23097	HITS-CLIP//PAR-CLIP	23446348|23824327	1	0	0	Unspecified
mirnet-hsa-75413	hsa-mir-490-3p	MIMAT0002806	NFASC	ENSG00000163531	23114	PAR-CLIP	23592263|20371350	1	0	0	Unspecified
mirnet-hsa-75414	hsa-mir-490-3p	MIMAT0002806	CLCC1	ENSG00000121940	23155	PAR-CLIP	23592263|22012620	1	0	0	Unspecified
mirnet-hsa-75415	hsa-mir-490-3p	MIMAT0002806	NUP205	ENSG00000155561	23165	PAR-CLIP	27292025	1	0	0	Unspecified
mirnet-hsa-75416	hsa-mir-490-3p	MIMAT0002806	FAM208A	ENSG00000163946	23272	PAR-CLIP	23592263	1	0	0	Unspecified
mirnet-hsa-75417	hsa-mir-490-3p	MIMAT0002806	ICOSLG	ENSG00000160223	23308	PAR-CLIP	22012620	1	0	0	Unspecified
mirnet-hsa-75418	hsa-mir-490-3p	MIMAT0002806	CLASP1	ENSG00000074054	23332	PAR-CLIP	22012620	1	0	0	Unspecified
mirnet-hsa-75419	hsa-mir-490-3p	MIMAT0002806	TSPAN15	ENSG00000099282	23555	PAR-CLIP	22100165	1	0	0	Unspecified
mirnet-hsa-75420	hsa-mir-490-3p	MIMAT0002806	CDC42EP4	ENSG00000179604	23580	PAR-CLIP	27292025	1	0	0	Unspecified
mirnet-hsa-75421	hsa-mir-490-3p	MIMAT0002806	PPP1R15A	ENSG00000087074	23645	PAR-CLIP	27292025	1	0	0	Unspecified
mirnet-hsa-75422	hsa-mir-490-3p	MIMAT0002806	PLEKHG3	ENSG00000126822	26030	PAR-CLIP	27292025	1	0	0	Unspecified
mirnet-hsa-75423	hsa-mir-490-3p	MIMAT0002806	ZNF500	ENSG00000103199	26048	HITS-CLIP	23824327	1	0	0	Unspecified
mirnet-hsa-75424	hsa-mir-490-3p	MIMAT0002806	TRAF3IP1	ENSG00000204104	26146	HITS-CLIP	23824327	1	0	0	Unspecified
mirnet-hsa-75425	hsa-mir-490-3p	MIMAT0002806	CKAP2	ENSG00000136108	26586	PAR-CLIP	20371350	1	0	0	Unspecified
mirnet-hsa-75426	hsa-mir-490-3p	MIMAT0002806	HAVCR1	ENSG00000113249	26762	HITS-CLIP	23313552	1	0	0	Unspecified
mirnet-hsa-75427	hsa-mir-490-3p	MIMAT0002806	RANBP6	ENSG00000137040	26953	PAR-CLIP	27292025	1	0	0	Unspecified
mirnet-hsa-75428	hsa-mir-490-3p	MIMAT0002806	PELP1	ENSG00000141456	27043	PAR-CLIP	26701625	1	0	0	Unspecified
mirnet-hsa-75429	hsa-mir-490-3p	MIMAT0002806	DISC1	ENSG00000162946	27185	PAR-CLIP	23592263|26701625|27292025	1	0	0	Unspecified
mirnet-hsa-75430	hsa-mir-490-3p	MIMAT0002806	MOCS3	ENSG00000124217	27304	HITS-CLIP	23313552	1	0	0	Unspecified
mirnet-hsa-75431	hsa-mir-490-3p	MIMAT0002806	EEF2K	ENSG00000103319	29904	PAR-CLIP	27292025	1	0	0	Unspecified
mirnet-hsa-75432	hsa-mir-490-3p	MIMAT0002806	IRAK4	ENSG00000198001	51135	PAR-CLIP	23446348|21572407	1	0	0	Unspecified
mirnet-hsa-75433	hsa-mir-490-3p	MIMAT0002806	MRNIP	ENSG00000283918	51149	PAR-CLIP	27292025	1	0	0	Unspecified
mirnet-hsa-75434	hsa-mir-490-3p	MIMAT0002806	PLCE1	ENSG00000138193	51196	HITS-CLIP//PAR-CLIP	23824327|27292025	1	0	0	Unspecified
mirnet-hsa-75435	hsa-mir-490-3p	MIMAT0002806	RSRC1	ENSG00000174891	51319	PAR-CLIP	23446348|21572407|20371350	1	0	0	Unspecified
mirnet-hsa-75436	hsa-mir-490-3p	MIMAT0002806	ZNF117	ENSG00000152926	51351	HITS-CLIP	23313552	1	0	0	Unspecified
mirnet-hsa-75437	hsa-mir-490-3p	MIMAT0002806	EIF3L	ENSG00000100129	51386	HITS-CLIP	23313552	1	0	0	Unspecified
mirnet-hsa-75438	hsa-mir-490-3p	MIMAT0002806	NCKIPSD	ENSG00000213672	51517	HITS-CLIP//PAR-CLIP	23446348|23706177	1	0	0	Unspecified
mirnet-hsa-75439	hsa-mir-490-3p	MIMAT0002806	TRMO	ENSG00000136932	51531	PAR-CLIP	27292025	1	0	0	Unspecified
mirnet-hsa-75440	hsa-mir-490-3p	MIMAT0002806	ESF1	ENSG00000089048	51575	PAR-CLIP	27292025	1	0	0	Unspecified
mirnet-hsa-75441	hsa-mir-490-3p	MIMAT0002806	PCF11	ENSG00000165494	51585	PAR-CLIP	27292025	1	0	0	Unspecified
mirnet-hsa-75442	hsa-mir-490-3p	MIMAT0002806	ERGIC3	ENSG00000125991	51614	GFP reporter assay	23212913	1	0	0	Unspecified
mirnet-hsa-75443	hsa-mir-490-3p	MIMAT0002806	KLF13	ENSG00000275746	51621	PAR-CLIP	21572407	1	0	0	Unspecified
mirnet-hsa-75444	hsa-mir-490-3p	MIMAT0002806	MRPS23	ENSG00000181610	51649	PAR-CLIP	27292025	1	0	0	Unspecified
mirnet-hsa-75445	hsa-mir-490-3p	MIMAT0002806	CAB39	ENSG00000135932	51719	PAR-CLIP	27292025	1	0	0	Unspecified
mirnet-hsa-75446	hsa-mir-490-3p	MIMAT0002806	PRR13	ENSG00000205352	54458	HITS-CLIP	23313552	1	0	0	Unspecified
mirnet-hsa-75447	hsa-mir-490-3p	MIMAT0002806	FAM105A	ENSG00000145569	54491	HITS-CLIP//PAR-CLIP	23592263|23446348|23706177	1	0	0	Unspecified
mirnet-hsa-75448	hsa-mir-490-3p	MIMAT0002806	HES2	ENSG00000069812	54626	PAR-CLIP	22012620	1	0	0	Unspecified
mirnet-hsa-75449	hsa-mir-490-3p	MIMAT0002806	SLC35F6	ENSG00000213699	54978	PAR-CLIP	23592263	1	0	0	Unspecified
mirnet-hsa-75450	hsa-mir-490-3p	MIMAT0002806	RBM28	ENSG00000106344	55131	PAR-CLIP	26701625	1	0	0	Unspecified
mirnet-hsa-75451	hsa-mir-490-3p	MIMAT0002806	MRPS10	ENSG00000048544	55173	PAR-CLIP	27292025	1	0	0	Unspecified
mirnet-hsa-75452	hsa-mir-490-3p	MIMAT0002806	RIF1	ENSG00000080345	55183	PAR-CLIP	27292025	1	1	0	Unspecified
mirnet-hsa-75453	hsa-mir-490-3p	MIMAT0002806	DPPA4	ENSG00000121570	55211	PAR-CLIP	27292025	1	0	0	Unspecified
mirnet-hsa-75454	hsa-mir-490-3p	MIMAT0002806	VPS53	ENSG00000141252	55275	PAR-CLIP	27292025	1	0	0	Unspecified
mirnet-hsa-75455	hsa-mir-490-3p	MIMAT0002806	KLHL26	ENSG00000167487	55295	HITS-CLIP	19536157	1	0	0	Unspecified
mirnet-hsa-75456	hsa-mir-490-3p	MIMAT0002806	RBM38	ENSG00000132819	55544	PAR-CLIP	26701625	1	1	0	Unspecified
mirnet-hsa-75457	hsa-mir-490-3p	MIMAT0002806	PLXNA3	ENSG00000130827	55558	PAR-CLIP	27292025	1	0	0	Unspecified
mirnet-hsa-75458	hsa-mir-490-3p	MIMAT0002806	CYP20A1	ENSG00000119004	57404	PAR-CLIP	23592263	1	0	0	Unspecified
mirnet-hsa-75459	hsa-mir-490-3p	MIMAT0002806	ZNF490	ENSG00000188033	57474	PAR-CLIP	23592263	1	0	0	Unspecified
mirnet-hsa-75460	hsa-mir-490-3p	MIMAT0002806	NUFIP2	ENSG00000108256	57532	PAR-CLIP	23592263|21572407|20371350	1	0	0	Unspecified
mirnet-hsa-75461	hsa-mir-490-3p	MIMAT0002806	KLHL42	ENSG00000087448	57542	HITS-CLIP	23824327	1	0	0	Unspecified
mirnet-hsa-75462	hsa-mir-490-3p	MIMAT0002806	CRAMP1	ENSG00000007545	57585	HITS-CLIP	19536157	1	0	0	Unspecified
mirnet-hsa-75463	hsa-mir-490-3p	MIMAT0002806	HOMEZ	ENSG00000215271	57594	PAR-CLIP	27292025	1	0	0	Unspecified
mirnet-hsa-75464	hsa-mir-490-3p	MIMAT0002806	KIAA1456	ENSG00000250305	57604	HITS-CLIP	23706177	1	0	0	Unspecified
mirnet-hsa-75465	hsa-mir-490-3p	MIMAT0002806	CXCL16	ENSG00000161921	58191	PAR-CLIP	23592263	1	0	0	Unspecified
mirnet-hsa-75466	hsa-mir-490-3p	MIMAT0002806	CREBZF	ENSG00000137504	58487	PAR-CLIP	20371350	1	0	0	Unspecified
mirnet-hsa-75467	hsa-mir-490-3p	MIMAT0002806	ZNF250	ENSG00000196150	58500	PAR-CLIP	23446348	1	0	0	Unspecified
mirnet-hsa-75468	hsa-mir-490-3p	MIMAT0002806	SPCS3	ENSG00000129128	60559	PAR-CLIP	27292025	1	0	0	Unspecified
mirnet-hsa-75469	hsa-mir-490-3p	MIMAT0002806	CLSPN	ENSG00000092853	63967	PAR-CLIP	23592263	1	0	0	Unspecified
mirnet-hsa-75470	hsa-mir-490-3p	MIMAT0002806	C17orf75	ENSG00000108666	64149	PAR-CLIP	26701625|27292025	1	0	0	Unspecified
mirnet-hsa-75471	hsa-mir-490-3p	MIMAT0002806	ABCG8	ENSG00000143921	64241	PAR-CLIP	27292025	1	0	0	Unspecified
mirnet-hsa-75472	hsa-mir-490-3p	MIMAT0002806	RSRC2	ENSG00000111011	65117	PAR-CLIP	23592263|21572407|20371350	1	0	0	Unspecified
mirnet-hsa-75473	hsa-mir-490-3p	MIMAT0002806	TSEN34	ENSG00000273896	79042	PAR-CLIP	23592263	1	0	0	Unspecified
mirnet-hsa-75474	hsa-mir-490-3p	MIMAT0002806	CERS4	ENSG00000090661	79603	HITS-CLIP	27418678	1	0	0	Unspecified
mirnet-hsa-75475	hsa-mir-490-3p	MIMAT0002806	NOL9	ENSG00000162408	79707	PAR-CLIP	27292025	1	0	0	Unspecified
mirnet-hsa-75476	hsa-mir-490-3p	MIMAT0002806	ZMYM1	ENSG00000197056	79830	HITS-CLIP	23313552	1	0	0	Unspecified
mirnet-hsa-75477	hsa-mir-490-3p	MIMAT0002806	ZBTB3	ENSG00000185670	79842	PAR-CLIP	26701625|27292025	1	0	0	Unspecified
mirnet-hsa-75478	hsa-mir-490-3p	MIMAT0002806	TNKS2	ENSG00000107854	80351	Luciferase reporter assay//qRT-PCR//Western blot	27506313	1	0	0	Unspecified
mirnet-hsa-75479	hsa-mir-490-3p	MIMAT0002806	BHLHB9	ENSG00000198908	80823	PAR-CLIP	23592263|27292025	1	0	0	Unspecified
mirnet-hsa-75480	hsa-mir-490-3p	MIMAT0002806	FAHD1	ENSG00000180185	81889	PAR-CLIP	26701625	1	0	0	Unspecified
mirnet-hsa-75481	hsa-mir-490-3p	MIMAT0002806	RAB33B	ENSG00000172007	83452	HITS-CLIP	23313552	1	0	0	Unspecified
mirnet-hsa-75482	hsa-mir-490-3p	MIMAT0002806	SYT15	ENSG00000204176	83849	HITS-CLIP	22927820	1	0	0	Unspecified
mirnet-hsa-75483	hsa-mir-490-3p	MIMAT0002806	BRIP1	ENSG00000136492	83990	PAR-CLIP	27292025	1	0	0	Unspecified
mirnet-hsa-75484	hsa-mir-490-3p	MIMAT0002806	ZNF394	ENSG00000160908	84124	PAR-CLIP	23592263	1	0	0	Unspecified
mirnet-hsa-75485	hsa-mir-490-3p	MIMAT0002806	NOA1	ENSG00000084092	84273	PAR-CLIP	23592263|23446348	1	0	0	Unspecified
mirnet-hsa-75486	hsa-mir-490-3p	MIMAT0002806	CCDC77	ENSG00000120647	84318	HITS-CLIP	23313552	1	0	0	Unspecified
mirnet-hsa-75487	hsa-mir-490-3p	MIMAT0002806	TRIM63	ENSG00000158022	84676	HITS-CLIP	23824327	1	0	0	Unspecified
mirnet-hsa-75488	hsa-mir-490-3p	MIMAT0002806	ZNF607	ENSG00000198182	84775	PAR-CLIP	27292025	1	0	0	Unspecified
mirnet-hsa-75489	hsa-mir-490-3p	MIMAT0002806	LMNB2	ENSG00000176619	84823	PAR-CLIP	26701625	1	0	0	Unspecified
mirnet-hsa-75490	hsa-mir-490-3p	MIMAT0002806	FAM136A	ENSG00000035141	84908	HITS-CLIP	19536157	1	0	0	Unspecified
mirnet-hsa-75491	hsa-mir-490-3p	MIMAT0002806	PAPLN	ENSG00000100767	89932	PAR-CLIP	20371350	1	0	0	Unspecified
mirnet-hsa-75492	hsa-mir-490-3p	MIMAT0002806	ZNF766	ENSG00000196214	90321	HITS-CLIP	23824327	1	0	0	Unspecified
mirnet-hsa-75493	hsa-mir-490-3p	MIMAT0002806	CDKN2AIPNL	ENSG00000237190	91368	PAR-CLIP	27292025	1	0	0	Unspecified
mirnet-hsa-75494	hsa-mir-490-3p	MIMAT0002806	ZNF845	ENSG00000213799	91664	HITS-CLIP	23313552	1	0	0	Unspecified
mirnet-hsa-75495	hsa-mir-490-3p	MIMAT0002806	NXPE3	ENSG00000144815	91775	PAR-CLIP	21572407	1	0	0	Unspecified
mirnet-hsa-75496	hsa-mir-490-3p	MIMAT0002806	FDXACB1	ENSG00000255561	91893	PAR-CLIP	27292025	1	0	0	Unspecified
mirnet-hsa-75497	hsa-mir-490-3p	MIMAT0002806	RCSD1	ENSG00000198771	92241	PAR-CLIP	23592263	1	0	0	Unspecified
mirnet-hsa-75498	hsa-mir-490-3p	MIMAT0002806	DMKN	ENSG00000161249	93099	PAR-CLIP	27292025	1	0	0	Unspecified
mirnet-hsa-75499	hsa-mir-490-3p	MIMAT0002806	MAPK1IP1L	ENSG00000168175	93487	PAR-CLIP	23446348	1	0	0	Unspecified
mirnet-hsa-75500	hsa-mir-490-3p	MIMAT0002806	TGS1	ENSG00000137574	96764	PAR-CLIP	27292025	1	0	0	Unspecified
mirnet-hsa-75501	hsa-mir-490-3p	MIMAT0002806	XKR4	ENSG00000206579	114786	PAR-CLIP	23592263	1	0	0	Unspecified
mirnet-hsa-75502	hsa-mir-490-3p	MIMAT0002806	ZNF554	ENSG00000172006	115196	HITS-CLIP	23824327	1	0	0	Unspecified
mirnet-hsa-75503	hsa-mir-490-3p	MIMAT0002806	FOXP4	ENSG00000137166	116113	PAR-CLIP	27292025	1	0	0	Unspecified
mirnet-hsa-75504	hsa-mir-490-3p	MIMAT0002806	NUS1	ENSG00000153989	116150	PAR-CLIP	20371350	1	0	0	Unspecified
mirnet-hsa-75505	hsa-mir-490-3p	MIMAT0002806	MORN4	ENSG00000171160	118812	PAR-CLIP	23592263|23446348|21572407	1	0	0	Unspecified
mirnet-hsa-75506	hsa-mir-490-3p	MIMAT0002806	PDZD8	ENSG00000165650	118987	PAR-CLIP	27292025	1	0	0	Unspecified
mirnet-hsa-75507	hsa-mir-490-3p	MIMAT0002806	DNAJC24	ENSG00000170946	120526	PAR-CLIP	20371350	1	1	0	Unspecified
mirnet-hsa-75508	hsa-mir-490-3p	MIMAT0002806	ZNF641	ENSG00000167528	121274	PAR-CLIP	23446348|21572407	1	0	0	Unspecified
mirnet-hsa-75509	hsa-mir-490-3p	MIMAT0002806	IRGQ	ENSG00000167378	126298	HITS-CLIP//PAR-CLIP	23824327|26701625	1	0	0	Unspecified
mirnet-hsa-75510	hsa-mir-490-3p	MIMAT0002806	FAM241A	ENSG00000174749	132720	PAR-CLIP	27292025	1	0	0	Unspecified
mirnet-hsa-75511	hsa-mir-490-3p	MIMAT0002806	SPTY2D1	ENSG00000179119	144108	PAR-CLIP	22100165	1	1	0	Unspecified
mirnet-hsa-75512	hsa-mir-490-3p	MIMAT0002806	HNRNPA1L2	ENSG00000139675	144983	HITS-CLIP	23313552	1	0	0	Unspecified
mirnet-hsa-75513	hsa-mir-490-3p	MIMAT0002806	ZNF417	ENSG00000173480	147687	HITS-CLIP	23313552	1	0	0	Unspecified
mirnet-hsa-75514	hsa-mir-490-3p	MIMAT0002806	ZNF548	ENSG00000188785	147694	HITS-CLIP	23313552	1	0	0	Unspecified
mirnet-hsa-75515	hsa-mir-490-3p	MIMAT0002806	ZNF681	ENSG00000196172	148213	HITS-CLIP	23313552	1	0	0	Unspecified
mirnet-hsa-75516	hsa-mir-490-3p	MIMAT0002806	ZNF570	ENSG00000171827	148268	PAR-CLIP	26701625	1	0	0	Unspecified
mirnet-hsa-75517	hsa-mir-490-3p	MIMAT0002806	PPM1L	ENSG00000163590	151742	PAR-CLIP	21572407	1	0	0	Unspecified
mirnet-hsa-75518	hsa-mir-490-3p	MIMAT0002806	TMEM167A	ENSG00000174695	153339	PAR-CLIP	26701625	1	0	0	Unspecified
mirnet-hsa-75519	hsa-mir-490-3p	MIMAT0002806	PGBD4	ENSG00000182405	161779	PAR-CLIP	26701625	1	0	0	Unspecified
mirnet-hsa-75520	hsa-mir-490-3p	MIMAT0002806	LONRF2	ENSG00000170500	164832	HITS-CLIP	23824327	1	0	0	Unspecified
mirnet-hsa-75521	hsa-mir-490-3p	MIMAT0002806	KBTBD12	ENSG00000187715	166348	PAR-CLIP	23592263|27292025	1	0	0	Unspecified
mirnet-hsa-75522	hsa-mir-490-3p	MIMAT0002806	IBA57	ENSG00000181873	200205	HITS-CLIP//PAR-CLIP	23706177|27292025	1	0	0	Unspecified
mirnet-hsa-75523	hsa-mir-490-3p	MIMAT0002806	SENP5	ENSG00000119231	205564	PAR-CLIP	27292025	1	0	0	Unspecified
mirnet-hsa-75524	hsa-mir-490-3p	MIMAT0002806	FOXK1	ENSG00000164916	221937	PAR-CLIP	27292025	1	0	0	Unspecified
mirnet-hsa-75525	hsa-mir-490-3p	MIMAT0002806	MTURN	ENSG00000180354	222166	PAR-CLIP	27292025	1	0	0	Unspecified
mirnet-hsa-75526	hsa-mir-490-3p	MIMAT0002806	ZNF549	ENSG00000121406	256051	PAR-CLIP	27292025	1	0	0	Unspecified
mirnet-hsa-75527	hsa-mir-490-3p	MIMAT0002806	TTC9C	ENSG00000162222	283237	PAR-CLIP	26701625|27292025	1	0	0	Unspecified
mirnet-hsa-75528	hsa-mir-490-3p	MIMAT0002806	HARBI1	ENSG00000180423	283254	PAR-CLIP	27292025	1	0	0	Unspecified
mirnet-hsa-75529	hsa-mir-490-3p	MIMAT0002806	TMPRSS12	ENSG00000186452	283471	PAR-CLIP	27292025	1	0	0	Unspecified
mirnet-hsa-75530	hsa-mir-490-3p	MIMAT0002806	FADS6	ENSG00000172782	283985	PAR-CLIP	23592263	1	0	0	Unspecified
mirnet-hsa-75531	hsa-mir-490-3p	MIMAT0002806	ZNF860	ENSG00000197385	344787	PAR-CLIP	23446348|20371350	1	0	0	Unspecified
mirnet-hsa-75532	hsa-mir-490-3p	MIMAT0002806	SLC10A6	ENSG00000145283	345274	PAR-CLIP	27292025	1	0	0	Unspecified
mirnet-hsa-75533	hsa-mir-490-3p	MIMAT0002806	GEN1	ENSG00000178295	348654	PAR-CLIP	26701625	1	0	0	Unspecified
mirnet-hsa-75534	hsa-mir-490-3p	MIMAT0002806	RILPL1	ENSG00000188026	353116	PAR-CLIP	27292025	1	0	0	Unspecified
mirnet-hsa-75535	hsa-mir-490-3p	MIMAT0002806	SPEM1	ENSG00000181323	374768	PAR-CLIP	26701625|27292025	1	0	0	Unspecified
mirnet-hsa-75536	hsa-mir-490-3p	MIMAT0002806	ZNF699	ENSG00000196110	374879	PAR-CLIP	27292025	1	0	0	Unspecified
mirnet-hsa-75537	hsa-mir-490-3p	MIMAT0002806	NUDT19	ENSG00000213965	390916	PAR-CLIP	27292025	1	0	0	Unspecified
mirnet-hsa-75538	hsa-mir-490-3p	MIMAT0002806	SRRD	ENSG00000100104	402055	PAR-CLIP	23592263|27292025	1	0	0	Unspecified
mirnet-hsa-75539	hsa-mir-490-3p	MIMAT0002806	ZYG11A	ENSG00000203995	440590	PAR-CLIP	26701625	1	0	0	Unspecified
mirnet-hsa-75540	hsa-mir-490-3p	MIMAT0002806	TRIM72	ENSG00000177238	493829	PAR-CLIP	22012620|27292025	1	0	0	Unspecified
mirnet-hsa-75541	hsa-mir-490-3p	MIMAT0002806	FBXO48	ENSG00000204923	554251	PAR-CLIP	27292025	1	0	0	Unspecified
mirnet-hsa-75542	hsa-mir-490-3p	MIMAT0002806	ZNF674	ENSG00000251192	641339	HITS-CLIP//PAR-CLIP	23824327|22927820|27292025	1	0	0	Unspecified
mirnet-hsa-75543	hsa-mir-490-3p	MIMAT0002806	SDHAF1	ENSG00000205138	644096	PAR-CLIP	27292025	1	0	0	Unspecified
mirnet-hsa-75544	hsa-mir-490-3p	MIMAT0002806	C6orf132	ENSG00000188112	647024	PAR-CLIP	27292025	1	0	0	Unspecified
mirnet-hsa-75545	hsa-mir-490-3p	MIMAT0002806	PPP1R3G	ENSG00000219607	648791	PAR-CLIP	27292025	1	0	0	Unspecified
mirnet-hsa-75546	hsa-mir-490-3p	MIMAT0002806	CASTOR2	ENSG00000274070	729438	HITS-CLIP	27418678	1	0	0	Unspecified
mirnet-hsa-75547	hsa-mir-490-3p	MIMAT0002806	ZNF726	ENSG00000213967	730087	PAR-CLIP	26701625	1	0	0	Unspecified
mirnet-hsa-75548	hsa-mir-490-3p	MIMAT0002806	SIGLEC14	ENSG00000254415	100049587	PAR-CLIP	23592263|27292025	1	0	0	Unspecified
mirnet-hsa-75549	hsa-mir-490-3p	MIMAT0002806	ZNF737	ENSG00000237440	100129842	HITS-CLIP	23313552	1	0	0	Unspecified
mirnet-hsa-75550	hsa-mir-490-3p	MIMAT0002806	KLLN	ENSG00000227268	100144748	PAR-CLIP	23592263|23446348|21572407	1	0	0	Unspecified
mirnet-hsa-75551	hsa-mir-490-3p	MIMAT0002806	MTRNR2L7	ENSG00000256892	100288485	PAR-CLIP	23446348	1	0	0	Unspecified
mirnet-hsa-75552	hsa-mir-490-3p	MIMAT0002806	MTRNR2L1	ENSG00000256618	100462977	HITS-CLIP//PAR-CLIP	23446348|20371350|27292025|27418678	1	0	0	Unspecified
mirnet-hsa-75553	hsa-mir-490-3p	MIMAT0002806	ZNF891	ENSG00000214029	101060200	HITS-CLIP	23824327	1	0	0	Unspecified
mirnet-hsa-75554	hsa-mir-490-3p	MIMAT0002806	C11orf98	ENSG00000278615	102288414	PAR-CLIP	26701625	1	0	0	Unspecified
mirnet-hsa-203189	hsa-mir-4423-3p	MIMAT0018936	XIAP	ENSG00000101966	331	PAR-CLIP	21572407	1	0	0	Unspecified
mirnet-hsa-203190	hsa-mir-4423-3p	MIMAT0018936	ARF6	ENSG00000165527	382	PAR-CLIP	22291592	1	0	0	Unspecified
mirnet-hsa-203191	hsa-mir-4423-3p	MIMAT0018936	RHOG	ENSG00000177105	391	PAR-CLIP	26701625	1	0	0	Unspecified
mirnet-hsa-203192	hsa-mir-4423-3p	MIMAT0018936	ATP6V1E1	ENSG00000131100	529	PAR-CLIP	27292025	1	0	0	Unspecified
mirnet-hsa-203193	hsa-mir-4423-3p	MIMAT0018936	EMP1	ENSG00000134531	2012	PAR-CLIP	22291592	1	0	0	Unspecified
mirnet-hsa-203194	hsa-mir-4423-3p	MIMAT0018936	EPRS	ENSG00000136628	2058	HITS-CLIP	19536157	1	0	0	Unspecified
mirnet-hsa-203195	hsa-mir-4423-3p	MIMAT0018936	GABRB1	ENSG00000163288	2560	HITS-CLIP	27418678	1	0	0	Unspecified
mirnet-hsa-203196	hsa-mir-4423-3p	MIMAT0018936	GMDS	ENSG00000112699	2762	PAR-CLIP	22012620	1	0	0	Unspecified
mirnet-hsa-203197	hsa-mir-4423-3p	MIMAT0018936	NR3C1	ENSG00000113580	2908	PAR-CLIP	23592263	1	1	0	Unspecified
mirnet-hsa-203198	hsa-mir-4423-3p	MIMAT0018936	GYS2	ENSG00000111713	2998	HITS-CLIP	23824327	1	0	0	Unspecified
mirnet-hsa-203199	hsa-mir-4423-3p	MIMAT0018936	HLX	ENSG00000136630	3142	HITS-CLIP	19536157	1	0	0	Unspecified
mirnet-hsa-203200	hsa-mir-4423-3p	MIMAT0018936	IGF1R	ENSG00000140443	3480	PAR-CLIP	21572407	1	0	0	Unspecified
mirnet-hsa-203201	hsa-mir-4423-3p	MIMAT0018936	LTBP2	ENSG00000119681	4053	PAR-CLIP	22291592	1	0	0	Unspecified
mirnet-hsa-203202	hsa-mir-4423-3p	MIMAT0018936	MFAP3	ENSG00000037749	4238	PAR-CLIP	22291592	1	0	0	Unspecified
mirnet-hsa-203203	hsa-mir-4423-3p	MIMAT0018936	NCAM2	ENSG00000154654	4685	PAR-CLIP	27292025	1	0	0	Unspecified
mirnet-hsa-203204	hsa-mir-4423-3p	MIMAT0018936	ORC4	ENSG00000115947	5000	PAR-CLIP	21572407	1	0	0	Unspecified
mirnet-hsa-203205	hsa-mir-4423-3p	MIMAT0018936	POU3F3	ENSG00000198914	5455	HITS-CLIP	23824327|28735896	1	0	0	Unspecified
mirnet-hsa-203206	hsa-mir-4423-3p	MIMAT0018936	PPIC	ENSG00000168938	5480	PAR-CLIP	23592263|20371350|26701625	1	0	0	Unspecified
mirnet-hsa-203207	hsa-mir-4423-3p	MIMAT0018936	PPP1R2	ENSG00000184203	5504	HITS-CLIP	23313552	1	0	0	Unspecified
mirnet-hsa-203208	hsa-mir-4423-3p	MIMAT0018936	ATXN1	ENSG00000124788	6310	PAR-CLIP	21572407	1	0	0	Unspecified
mirnet-hsa-203209	hsa-mir-4423-3p	MIMAT0018936	SLC8A1	ENSG00000183023	6546	PAR-CLIP	22012620	1	0	0	Unspecified
mirnet-hsa-203210	hsa-mir-4423-3p	MIMAT0018936	TBX15	ENSG00000092607	6913	PAR-CLIP	22291592	1	0	0	Unspecified
mirnet-hsa-203211	hsa-mir-4423-3p	MIMAT0018936	NSD2	ENSG00000109685	7468	PAR-CLIP	20371350	1	0	0	Unspecified
mirnet-hsa-203212	hsa-mir-4423-3p	MIMAT0018936	WRN	ENSG00000165392	7486	HITS-CLIP	23313552	1	0	0	Unspecified
mirnet-hsa-203213	hsa-mir-4423-3p	MIMAT0018936	EIF3H	ENSG00000147677	8667	PAR-CLIP	22291592	1	0	0	Unspecified
mirnet-hsa-203214	hsa-mir-4423-3p	MIMAT0018936	SLC16A7	ENSG00000118596	9194	PAR-CLIP	23592263	1	0	0	Unspecified
mirnet-hsa-203215	hsa-mir-4423-3p	MIMAT0018936	CLOCK	ENSG00000134852	9575	PAR-CLIP	22291592	1	0	0	Unspecified
mirnet-hsa-203216	hsa-mir-4423-3p	MIMAT0018936	JADE3	ENSG00000102221	9767	PAR-CLIP	20371350	1	0	0	Unspecified
mirnet-hsa-203217	hsa-mir-4423-3p	MIMAT0018936	IP6K1	ENSG00000176095	9807	PAR-CLIP	26701625	1	0	0	Unspecified
mirnet-hsa-203218	hsa-mir-4423-3p	MIMAT0018936	TESPA1	ENSG00000135426	9840	HITS-CLIP	27418678	1	0	0	Unspecified
mirnet-hsa-203219	hsa-mir-4423-3p	MIMAT0018936	EPM2AIP1	ENSG00000178567	9852	PAR-CLIP	21572407|27292025	1	0	0	Unspecified
mirnet-hsa-203220	hsa-mir-4423-3p	MIMAT0018936	ZBTB33	ENSG00000177485	10009	PAR-CLIP	20371350	1	0	0	Unspecified
mirnet-hsa-203221	hsa-mir-4423-3p	MIMAT0018936	VTI1B	ENSG00000100568	10490	PAR-CLIP	22291592	1	0	0	Unspecified
mirnet-hsa-203222	hsa-mir-4423-3p	MIMAT0018936	FERMT2	ENSG00000073712	10979	PAR-CLIP	23446348	1	0	0	Unspecified
mirnet-hsa-203223	hsa-mir-4423-3p	MIMAT0018936	PAPD7	ENSG00000112941	11044	PAR-CLIP	21572407|20371350	1	0	0	Unspecified
mirnet-hsa-203224	hsa-mir-4423-3p	MIMAT0018936	BAZ2A	ENSG00000076108	11176	PAR-CLIP	22291592	1	0	0	Unspecified
mirnet-hsa-203225	hsa-mir-4423-3p	MIMAT0018936	MGAT4A	ENSG00000071073	11320	PAR-CLIP	23446348	1	0	0	Unspecified
mirnet-hsa-203226	hsa-mir-4423-3p	MIMAT0018936	GOLGA8A	ENSG00000175265	23015	PAR-CLIP	23592263	1	0	0	Unspecified
mirnet-hsa-203227	hsa-mir-4423-3p	MIMAT0018936	PPWD1	ENSG00000113593	23398	PAR-CLIP	20371350	1	0	0	Unspecified
mirnet-hsa-203228	hsa-mir-4423-3p	MIMAT0018936	ATP1B4	ENSG00000101892	23439	PAR-CLIP	22291592	1	0	0	Unspecified
mirnet-hsa-203229	hsa-mir-4423-3p	MIMAT0018936	CBX6	ENSG00000183741	23466	PAR-CLIP	23446348|21572407|20371350	1	0	0	Unspecified
mirnet-hsa-203230	hsa-mir-4423-3p	MIMAT0018936	FRRS1L	ENSG00000260230	23732	HITS-CLIP	19536157	1	0	0	Unspecified
mirnet-hsa-203231	hsa-mir-4423-3p	MIMAT0018936	OSBP2	ENSG00000184792	23762	PAR-CLIP	20371350	1	0	0	Unspecified
mirnet-hsa-203232	hsa-mir-4423-3p	MIMAT0018936	ARIH1	ENSG00000166233	25820	PAR-CLIP	22291592	1	0	0	Unspecified
mirnet-hsa-203233	hsa-mir-4423-3p	MIMAT0018936	ZNF451	ENSG00000112200	26036	HITS-CLIP	23824327	1	0	0	Unspecified
mirnet-hsa-203234	hsa-mir-4423-3p	MIMAT0018936	MORC1	ENSG00000114487	27136	PAR-CLIP	22291592	1	0	0	Unspecified
mirnet-hsa-203235	hsa-mir-4423-3p	MIMAT0018936	CNNM2	ENSG00000148842	54805	PAR-CLIP	22012620|26701625	1	0	0	Unspecified
mirnet-hsa-203236	hsa-mir-4423-3p	MIMAT0018936	TOR4A	ENSG00000198113	54863	PAR-CLIP	26701625	1	0	0	Unspecified
mirnet-hsa-203237	hsa-mir-4423-3p	MIMAT0018936	FAM206A	ENSG00000119328	54942	PAR-CLIP	20371350	1	0	0	Unspecified
mirnet-hsa-203238	hsa-mir-4423-3p	MIMAT0018936	VEZT	ENSG00000028203	55591	HITS-CLIP	23824327	1	0	0	Unspecified
mirnet-hsa-203239	hsa-mir-4423-3p	MIMAT0018936	CLDND1	ENSG00000080822	56650	PAR-CLIP	26701625	1	0	0	Unspecified
mirnet-hsa-203240	hsa-mir-4423-3p	MIMAT0018936	CREBZF	ENSG00000137504	58487	PAR-CLIP	23446348	1	0	0	Unspecified
mirnet-hsa-203241	hsa-mir-4423-3p	MIMAT0018936	NSUN3	ENSG00000178694	63899	PAR-CLIP	22291592	1	0	0	Unspecified
mirnet-hsa-203242	hsa-mir-4423-3p	MIMAT0018936	IRF2BPL	ENSG00000119669	64207	HITS-CLIP//PAR-CLIP	23824327|26701625|27418678	1	0	0	Unspecified
mirnet-hsa-203243	hsa-mir-4423-3p	MIMAT0018936	PLEKHG2	ENSG00000090924	64857	PAR-CLIP	22291592	1	0	0	Unspecified
mirnet-hsa-203244	hsa-mir-4423-3p	MIMAT0018936	UBE2Z	ENSG00000159202	65264	PAR-CLIP	24398324|21572407	1	0	0	Unspecified
mirnet-hsa-203245	hsa-mir-4423-3p	MIMAT0018936	E2F8	ENSG00000129173	79733	PAR-CLIP	21572407	1	0	0	Unspecified
mirnet-hsa-203246	hsa-mir-4423-3p	MIMAT0018936	ATAT1	ENSG00000137343	79969	HITS-CLIP	23824327|23313552	1	0	0	Unspecified
mirnet-hsa-203247	hsa-mir-4423-3p	MIMAT0018936	ZDHHC18	ENSG00000204160	84243	PAR-CLIP	23446348	1	0	0	Unspecified
mirnet-hsa-203248	hsa-mir-4423-3p	MIMAT0018936	ZBED3	ENSG00000132846	84327	PAR-CLIP	20371350	1	0	0	Unspecified
mirnet-hsa-203249	hsa-mir-4423-3p	MIMAT0018936	LCOR	ENSG00000196233	84458	PAR-CLIP	21572407	1	0	0	Unspecified
mirnet-hsa-203250	hsa-mir-4423-3p	MIMAT0018936	ACTRT3	ENSG00000184378	84517	PAR-CLIP	22291592	1	0	0	Unspecified
mirnet-hsa-203251	hsa-mir-4423-3p	MIMAT0018936	HDGFL2	ENSG00000167674	84717	PAR-CLIP	21572407	1	0	0	Unspecified
mirnet-hsa-203252	hsa-mir-4423-3p	MIMAT0018936	LMNB2	ENSG00000176619	84823	PAR-CLIP	23592263	1	0	0	Unspecified
mirnet-hsa-203253	hsa-mir-4423-3p	MIMAT0018936	DPP9	ENSG00000142002	91039	HITS-CLIP	23824327	1	0	0	Unspecified
mirnet-hsa-203254	hsa-mir-4423-3p	MIMAT0018936	PRAG1	ENSG00000275342	157285	PAR-CLIP	26701625	1	0	0	Unspecified
mirnet-hsa-203255	hsa-mir-4423-3p	MIMAT0018936	SDE2	ENSG00000143751	163859	PAR-CLIP	22291592	1	0	0	Unspecified
mirnet-hsa-203256	hsa-mir-4423-3p	MIMAT0018936	ZNF449	ENSG00000173275	203523	PAR-CLIP	20371350	1	0	0	Unspecified
mirnet-hsa-203257	hsa-mir-4423-3p	MIMAT0018936	GOLGA8IP	ENSG00000281356	283796	PAR-CLIP	23446348	1	0	0	Unspecified
mirnet-hsa-203258	hsa-mir-4423-3p	MIMAT0018936	C15orf52	ENSG00000188549	388115	HITS-CLIP//PAR-CLIP	23592263|23446348|20371350|24906430|26701625|27292025	1	0	0	Unspecified
mirnet-hsa-203259	hsa-mir-4423-3p	MIMAT0018936	ZNF704	ENSG00000164684	619279	PAR-CLIP	22291592	1	0	0	Unspecified
mirnet-hsa-214586	hsa-mir-4485-3p	MIMAT0019019	CLPTM1	ENSG00000104853	1209	PAR-CLIP	26701625	1	0	0	Unspecified
mirnet-hsa-214587	hsa-mir-4485-3p	MIMAT0019019	DUSP8	ENSG00000278165	1850	PAR-CLIP	27292025	1	0	0	Unspecified
mirnet-hsa-214588	hsa-mir-4485-3p	MIMAT0019019	UBE2K	ENSG00000078140	3093	PAR-CLIP	23446348|20371350	1	0	0	Unspecified
mirnet-hsa-214589	hsa-mir-4485-3p	MIMAT0019019	RAP2B	ENSG00000181467	5912	HITS-CLIP	23313552	1	0	0	Unspecified
mirnet-hsa-214590	hsa-mir-4485-3p	MIMAT0019019	CLIP1	ENSG00000130779	6249	PAR-CLIP	24398324|23446348|21572407|20371350	1	0	0	Unspecified
mirnet-hsa-214591	hsa-mir-4485-3p	MIMAT0019019	GPR37L1		9283	HITS-CLIP	23824327	1	0	0	Unspecified
mirnet-hsa-214592	hsa-mir-4485-3p	MIMAT0019019	TDRKH	ENSG00000182134	11022	PAR-CLIP	23592263|27292025	1	0	0	Unspecified
mirnet-hsa-214593	hsa-mir-4485-3p	MIMAT0019019	MTMR12	ENSG00000150712	54545	HITS-CLIP	23313552	1	0	0	Unspecified
Note: A total of 293 genes were enriched by each of the three characterized microRNAs because four of them, RAP2B, LMNB2, CREBZF, PPIC, had duplicates, and all of them ended up being included in that step of the analysis at 289 genes.

## Sheet: 1717 Metabolism-related genes
Gene
HK3
HK1
HK2
HKDC1
GCK
GPI
PFKM
PFKP
PFKL
FBP1
FBP2
ALDOC
ALDOA
ALDOB
TPI1
GAPDH
GAPDHS
PGK2
PGK1
PGAM1
PGAM2
PGAM4
ENO3
ENO2
ENO1
ENO4
PKM
PKLR
PDHA2
PDHA1
PDHB
DLAT
DLD
LDHAL6A
LDHAL6B
LDHA
LDHB
LDHC
ADH1A
ADH1B
ADH1C
ADH7
ADH4
ADH5
ADH6
AKR1A1
ALDH2
ALDH3A2
ALDH1B1
ALDH7A1
ALDH9A1
ALDH3B1
ALDH3B2
ALDH3A1
ACSS1
ACSS2
GALM
PGM1
PGM2
G6PC1
G6PC2
G6PC3
ADPGK
BPGM
MINPP1
PCK1
PCK2
CS
ACLY
ACO2
ACO1
IDH1
IDH2
IDH3B
IDH3G
IDH3A
OGDHL
OGDH
DLST
SUCLG1
SUCLG2
SUCLA2
SDHA
SDHB
SDHC
SDHD
FH
MDH1
MDH2
PC
G6PD
PGLS
H6PD
PGD
RPE
RPEL1
TKT
TKTL2
TKTL1
TALDO1
RPIA
DERA
RBKS
PRPS1L1
PRPS2
PRPS1
RGN
IDNK
GLYCTK
GUSB
KL
UGT2A1
UGT2A3
UGT2B17
UGT2B11
UGT2B28
UGT1A6
UGT1A4
UGT1A1
UGT1A3
UGT2B10
UGT1A9
UGT2B7
UGT1A10
UGT1A8
UGT1A5
UGT2B15
UGT1A7
UGT2B4
UGT2A2
UGDH
UGP2
CRYL1
XYLB
AKR1B1
AKR1B10
DCXR
SORD
DHDH
CRPPA
MPI
PMM2
PMM1
GMPPB
GMPPA
GMDS
GFUS
FPGT
FCSK
ENOSF1
PFKFB1
PFKFB2
PFKFB3
PFKFB4
TIGAR
KHK
TKFC
GALK1
GALT
GALE
GLB1
LCT
LALBA
B4GALT1
B4GALT2
GLA
MGAM
MGAM2
GAA
GANC
SI
MIOX
ACACA
ACACB
ACSF3
MCAT
FASN
OXSM
CBR4
HSD17B8
HTD2
MECR
OLAH
ACSL6
ACSL4
ACSL1
ACSL5
ACSL3
ACSBG1
ACSBG2
ACAA2
HADHB
HADH
HADHA
ECHS1
PPT1
PPT2
ELOVL1
ELOVL2
ELOVL3
ELOVL4
ELOVL5
ELOVL6
ELOVL7
HSD17B12
HACD2
HACD1
HACD4
HACD3
TECR
ACOT4
ACOT2
ACOT1
ACOT7
THEM4
THEM5
ACAT2
ACAT1
ACAA1
EHHADH
ACOX3
ACOX1
ACADS
ACADM
ACADL
ACADSB
ACADVL
GCDH
CPT1A
CPT1B
CPT1C
CPT2
ECI1
ECI2
CYP2U1
FDFT1
SQLE
LSS
CYP51A1
TM7SF2
LBR
MSMO1
NSDHL
HSD17B7
EBP
DHCR24
SC5D
DHCR7
LIPA
CEL
SOAT2
SOAT1
CYP2R1
CYP27B1
CYP24A1
CYP46A1
CYP39A1
HSD3B7
CH25H
CYP7B1
CYP7A1
CYP27A1
CYP8B1
AKR1D1
AKR1C4
SLC27A5
AMACR
ACOX2
HSD17B4
SCP2
ACOT8
BAAT
TAT
COQ2
COQ6
COQ3
COQ5
COQ7
NQO1
GGCX
VKORC1
VKORC1L1
HPD
CYP11A1
CYP17A1
STS
SULT2B1
CYP21A2
HSD3B1
HSD3B2
SRD5A1
SRD5A2
SRD5A3
AKR1C2
AKR1C3
CYP11B1
CYP11B2
HSD11B1
HSD11B1L
HSD11B2
AKR1C1
SULT1E1
HSD17B1
HSD17B2
HSD17B6
DHRS11
CYP1A1
CYP1A2
CYP3A5
CYP3A7
CYP3A7-CYP3A51P
CYP2E1
CYP3A4
CYP1B1
CYP19A1
COMT
LRTOMT
HSD17B3
ND1
ND2
ND3
ND4
ND4L
ND5
ND6
NDUFS1
NDUFS2
NDUFS3
NDUFS4
NDUFS5
NDUFS6
NDUFS7
NDUFS8
NDUFV1
NDUFV2
NDUFV3
NDUFA1
NDUFA2
NDUFA3
NDUFA4
NDUFA4L2
NDUFA5
NDUFA6
NDUFA7
NDUFA8
NDUFA9
NDUFA10
NDUFAB1
NDUFA11
NDUFA12
NDUFA13
NDUFB1
NDUFB2
NDUFB3
NDUFB4
NDUFB5
NDUFB6
NDUFB7
NDUFB8
NDUFB9
NDUFB10
NDUFB11
NDUFC1
NDUFC2
NDUFC2-KCTD14
UQCRFS1
CYTB
CYC1
UQCRC1
UQCRC2
UQCRH
UQCRHL
UQCRB
UQCRQ
UQCR10
UQCR11
COX10
COX3
COX1
COX2
COX4I2
COX4I1
COX5A
COX5B
COX6A1
COX6A2
COX6B1
COX6B2
COX6C
COX7A1
COX7A2
COX7A2L
COX7B
COX7B2
COX7C
COX8C
COX8A
COX11
COX15
COX17
CYCS
ATP5F1A
ATP5F1B
ATP5F1C
ATP5F1D
ATP5F1E
ATP5PO
ATP6
ATP5PB
ATP5MC1
ATP5MC2
ATP5MC3
ATP5PD
ATP5ME
ATP5MF
ATP5MG
ATP5PF
ATP8
ATP6V1A
ATP6V1B1
ATP6V1B2
ATP6V1C2
ATP6V1C1
ATP6V1D
ATP6V1E2
ATP6V1E1
ATP6V1F
ATP6V1G1
ATP6V1G3
ATP6V1G2
ATP6V1H
TCIRG1
ATP6V0A2
ATP6V0A4
ATP6V0A1
ATP6V0C
ATP6V0B
ATP6V0D1
ATP6V0D2
ATP6V0E1
ATP6V0E2
ATP6AP1
ATP4A
ATP4B
ATP12A
PPA2
PPA1
LHPP
OTC
ASS1
ASL
ARG2
ARG1
NOS1
NOS2
NOS3
GLS2
GLS
GLUL
GLUD2
GLUD1
CPS1
GOT1
GOT1L1
GOT2
GPT2
GPT
NAGS
ACY1
ABHD14A-ACY1
NUDT9
ADPRM
NUDT5
PPAT
GART
PFAS
PAICS
ADSL
ATIC
APRT
NT5C2
NT5C1A
NT5C1B
NT5C
NT5M
NT5C1B-RDH14
NT5E
PNP
HPRT1
IMPDH1
IMPDH2
NME6
NME7
NME2
NME4
NME1
NME3
NME1-NME2
AK9
ENTPD3
ENTPD8
ENTPD1
CANT1
ENTPD4
ENTPD5
ENTPD6
NUDT16
ITPA
XDH
NUDT2
GMPS
GMPR
GMPR2
GDA
GUK1
RRM1
RRM2B
RRM2
HDDC2
DGUOK
DCK
HDDC3
PRUNE1
ADCY1
ADCY2
ADCY3
ADCY4
ADCY5
ADCY6
ADCY7
ADCY8
ADCY9
ADCY10
GUCY1A2
GUCY1A1
GUCY1B1
GUCY2C
GUCY2D
GUCY2F
NPR1
NPR2
PDE1A
PDE1B
PDE1C
PDE2A
PDE3A
PDE3B
PDE5A
PDE6A
PDE6B
PDE6C
PDE6D
PDE6G
PDE6H
PDE9A
PDE10A
PDE11A
ADSS1
ADSS2
AMPD2
AMPD3
AMPD1
ADK
ADA
ADA2
AK7
AK4
AK5
AK2
AK1
AK8
AK6
AK3
ENTPD2
NTPCR
PDE4A
PDE4B
PDE4C
PDE4D
PDE7A
PDE7B
PDE8B
PDE8A
FHIT
ENPP4
PAPSS2
PAPSS1
ENPP1
ENPP3
URAD
ALLC
NAT2
NAT1
CYP2A6
CYP2A7
CAD
DHODH
UMPS
CMPK1
CMPK2
ASMTL
CTPS1
CTPS2
UCK1
UCK2
UCKL1
UPP2
UPP1
DPYD
DPYS
UPB1
NT5C3A
NT5C3B
CDA
DCTPP1
DCTD
DTYMK
DUT
TYMP
TK2
TK1
TYMS
IL4I1
DDO
ASRGL1
ASNS
NIT2
AGXT
AGXT2
NAT8L
RIMKLB
RIMKLA
FOLH1
ASPA
GAD1
GAD2
ABAT
ALDH5A1
ALDH4A1
GFPT2
GFPT1
SHMT2
SHMT1
GRHPR
PHGDH
PSAT1
PSPH
GCAT
ALAS1
ALAS2
MAOB
MAOA
AOC3
AOC2
GLDC
AMT
GCSH
DAO
GATM
GAMT
CHDH
BHMT
DMGDH
PIPOX
SARDH
GNMT
CBS
CTH
SDS
SDSL
SRR
KYAT3
KYAT1
BHMT2
MTR
MAT2B
MAT1A
MAT2A
AMD1
SRM
SMS
MTAP
MRI1
APIP
ENOPH1
ADI1
DNMT1
DNMT3A
DNMT3B
AHCYL2
AHCYL1
AHCY
BCAT2
BCAT1
GCLC
GCLM
GSS
CDO1
MPST
TST
BCKDHA
BCKDHB
DBT
IVD
ACAD8
HSD17B10
PCCA
PCCB
MCEE
MMUT
HIBCH
HIBADH
ALDH6A1
AOX1
MCCC1
MCCC2
AUH
HMGCL
HMGCLL1
OXCT1
OXCT2
AACS
HMGCS1
HMGCS2
AASS
AADAT
DHTKD1
HYKK
PHYKPL
CAMKMT
KMT2A
KMT2D
KMT2C
KMT2B
KMT2E
SETD1B
SETD1A
SETD7
PRDM9
PRDM7
ASH1L
SMYD2
SMYD3
SMYD1
SUV39H1
SUV39H2
EHMT2
EHMT1
SETDB1
SETDB2
PRDM2
EZH1
EZH2
SETMAR
NSD1
NSD2
NSD3
SETD2
DOT1L
KMT5A
PRDM6
KMT5C
KMT5B
MECOM
PRDM16
TMLHE
BBOX1
PLOD1
PLOD2
PLOD3
COLGALT1
COLGALT2
CKM
CKMT1A
CKMT2
CKB
CKMT1B
AZIN2
AGMAT
ODC1
AOC1
SMOX
CNDP1
CNDP2
CARNS1
SAT2
SAT1
OAT
PYCR3
PYCR2
PYCR1
PRODH
proline dehydrogenase 1
mitochondrial [KO:K00318] [EC:1.5.5.2]
ALDH18A1
LAP3
P4HA2
P4HA3
P4HA1
PRODH2
HOGA1
L3HYPDH
HAL
UROC1
AMDHD1
FTCD
HDC
HNMT
CARNMT1
HGD
GSTZ1
FAH
TYR
TH
DCT
TYRP1
DDC
DBH
PNMT
TPO
FAHD1
MIF
PAH
GLYAT
TDO2
IDO1
IDO2
AFMID
KMO
KYNU
HAAO
ACMSD
ALDH8A1
TPH2
TPH1
ASMT
AANAT
INMT
CAT
GADL1
CSAD
MLYCD
ADO
GGT7
GGT6
GGT1
GGT5
PCYT2
SELENOI
CEPT1
PCYT1B
PCYT1A
CHPT1
SCLY
TXNRD1
TXNRD3
TXNRD2
SEPHS2
SEPHS1
PSTK
SEPSECS
MARS1
MARS2
DGLUCY
GGCT
CHAC1
CHAC2
OPLAH
ANPEP
GSTA5
GSTA2
GSTA4
GSTO2
GSTM4
GSTT2
GSTT1
GSTM3
MGST1
MGST3
GSTM1
GSTM5
MGST2
GSTA1
GSTM2
GSTA3
GSTO1
GSTT2B
GSTP1
GSTK1
HPGDS
LANCL1
NAT8
NAT8B
GSR
TXNDC12
GPX4
GPX6
GPX7
GPX2
GPX3
GPX1
GPX5
GPX8
PRDX6
GBA3
GYS2
GYS1
GYG1
GYG2
GBE1
PYGL
PYGM
PYGB
AGL
AMY1C
AMY2A
AMY1A
AMY2B
AMY1B
TREH
PGM2L1
DOLK
DPAGT1
ALG5
ALG13
ALG14
DPM1
DPM2
DPM3
ALG1
ALG2
ALG11
ALG3
ALG9
ALG12
ALG6
ALG8
ALG10
ALG10B
STT3A
STT3B
RPN1
RPN2
DAD1
TUSC3
DDOST
DOLPP1
MOGS
GANAB
MAN1B1
MAN1A2
MAN1C1
MAN1A1
MGAT1
MAN2A1
MAN2A2
MGAT2
FUT8
B4GALT3
ST6GAL1
ST6GAL2
MGAT3
MGAT4A
MGAT4B
MGAT4D
MGAT5
MGAT5B
MGAT4C
NEU1
NEU3
NEU4
NEU2
HEXA
HEXB
HEXD
MAN2C1
MAN2B1
MAN2B2
MANBA
ENGASE
FUCA1
FUCA2
AGA
GBA
GBA2
GALNTL6
GALNT5
GALNT17
GALNT11
GALNT12
GALNT13
GALNT14
GALNT16
GALNT15
GALNT18
GALNTL5
GALNT10
GALNT2
GALNT3
GALNT1
GALNT6
GALNT4
GALNT9
GALNT7
GALNT8
POC1B-GALNT4
C1GALT1
C1GALT1C1
C1GALT1C1L
GCNT1
GCNT3
GCNT4
ST3GAL1
ST3GAL2
ST6GALNAC1
ST6GALNAC2
ST6GALNAC3
ST6GALNAC4
B3GNT3
B3GNT6
B4GALT5
ST3GAL3
B4GALNT3
B4GALNT4
CHST8
CHST9
OGT
EOGT
POFUT1
POFUT2
MFNG
LFNG
RFNG
B3GLCT
POGLUT1
GXYLT1
GXYLT2
XXYLT1
POMT1
POMT2
POMGNT1
B3GAT1
B3GAT2
CHST10
FUT9
FUT4
POMGNT2
B3GALNT2
POMK
FKTN
FKRP
RXYLT1
B4GAT1
LARGE1
LARGE2
CHIA
CHIT1
NAGK
AMDHD2
GNPDA1
GNPDA2
GNPNAT1
PGM3
GALK2
UAP1
UAP1L1
GNE
RENBP
NANS
NANP
NPL
CMAS
CYB5R1
CYB5R3
CYB5R2
CYB5RL
CYB5R4
UXS1
HYAL2
HYAL1
SPAM1
HYAL4
HYAL3
IDS
IDUA
ARSB
HPSE
HPSE2
SGSH
HGSNAT
NAGLU
GALNS
GNS
XYLT1
XYLT2
B4GALT7
B3GALT6
B3GAT3
CSGALNACT1
CSGALNACT2
CHSY3
CHSY1
CHPF
CHPF2
DSE
CHST11
CHST12
CHST13
CHST3
CHST7
CHST15
UST
CHST14
B3GNT2
CHST6
B4GALT4
B3GNT7
CHST1
CHST2
CHST4
EXTL2
EXTL3
EXTL1
EXT1
EXT2
NDST1
NDST2
NDST3
NDST4
GLCE
HS2ST1
HS6ST1
HS6ST2
HS6ST3
HS3ST1
HS3ST2
HS3ST3B1
HS3ST3A1
HS3ST5
GK2
GK
GPAM
GPAT2
GPAT4
GPAT3
AGPAT1
AGPAT2
AGPAT3
AGPAT4
AGPAT5
LCLAT1
MBOAT1
MBOAT2
PLPP1
PLPP3
PLPP2
LPIN1
LPIN3
LPIN2
PLPP5
PLPP4
DGKZ
DGKD
DGKI
DGKA
DGKE
DGKB
DGKH
DGKG
DGKQ
DGKK
DGAT1
DGAT2
MOGAT3
PNPLA2
PNPLA3
PNLIP
PNLIPRP1
PNLIPRP2
PNLIPRP3
LIPC
LIPF
LIPG
LPL
AGK
MGLL
MOGAT1
MOGAT2
PIK3C3
MTM1
MTMR1
MTMR2
MTMR3
MTMR4
MTMR8
MTMR6
MTMR7
MTMR14
PI4KA
PI4KB
PI4K2A
PI4K2B
SACM1L
INPP5F
PIP5K1C
PIP5K1A
PIP5K1B
PIP5KL1
OCRL
INPP5B
INPP5E
SYNJ1
SYNJ2
PIK3CA
PIK3CD
PIK3CB
PIK3CG
PTEN
INPP5D
INPPL1
PIK3C2G
PIK3C2A
PIK3C2B
INPP4A
INPP4B
PIKFYVE
FIG4
PIP4K2C
PIP4K2A
PIP4K2B
PLCB1
PLCB2
PLCB3
PLCB4
PLCD1
PLCD3
PLCD4
PLCE1
PLCG1
PLCG2
PLCZ1
PLCH1
PLCH2
IMPA2
IMPA1
CDIPT
ISYNA1
INPP1
INPP5A
INPP5K
INPP5J
ITPKB
ITPKA
ITPKC
ITPK1
IPMK
IPPK
PIGA
PIGC
PIGH
PIGP
PIGQ
PIGY
PIGL
PIGW
GPLD1
PIGM
PIGX
PIGV
PIGN
PIGB
PIGO
PIGF
PIGG
GPAA1
PIGK
PIGS
PIGT
PIGU
PGAP1
MPPE1
PIGZ
GPD1L
GPD1
GPD2
GNPAT
PLD1
PLD2
PLD3
PLD4
LCAT
PLA2G10
PLA2G2D
PLA2G2E
PLA2G3
PLA2G2F
PLA2G12A
PLA2G12B
PLA2G1B
PLA2G5
PLA2G2A
PLA2G2C
PLA2G4E
PLA2G4A
JMJD7-PLA2G4B
PLA2G4B
PLA2G4C
PLA2G4D
PLA2G4F
PLA2G6
PLB1
PLAAT3
LPCAT2
LPCAT1
LPCAT4
LPCAT3
LYPLA1
PLA2G15
LYPLA2
PNPLA6
PNPLA7
GPCPD1
CHAT
ACHE
CHKA
CHKB
PHOSPHO1
ETNK1
ETNK2
ETNPPL
PEMT
CDS1
CDS2
PLA1A
PTDSS1
PTDSS2
PISD
PGS1
CRLS1
TAFAZZIN
LPGAT1
MBOAT7
AGPS
PEDS1
PEDS1-UBE2V1
ENPP6
ENPP2
GDPD3
GDPD1
TMEM86B
UGT8
GAL3ST1
PAFAH1B1
PAFAH1B2
PAFAH1B3
PLA2G7
PAFAH2
PTGS1
PTGS2
PTGES
PTGES2
PTGES3
CBR1
CBR3
PRXL2B
TBXAS1
PTGDS
PTGIS
ALOX5
LTA4H
CYP4F2
CYP4F3
LTC4S
CYP2J2
CYP2C19
CYP4F8
ALOX12
ALOX12B
ALOX15B
CYP2B6
CYP2C8
CYP2C9
EPHX2
ALOX15
FADS2
SPTLC1
SPTLC2
SPTLC3
KDSR
CERS1
CERS2
CERS4
CERS3
CERS6
CERS5
ASAH1
ASAH2
ACER2
ACER1
ACER3
DEGS1
DEGS2
SGMS1
SGMS2
SMPD1
SMPD2
SMPD3
SMPD4
ENPP7
CERK
SGPP1
SGPP2
SPHK1
SPHK2
SGPL1
UGCG
B4GALT6
GALC
ARSA
PSAP
PSAPL1
B3GNT5
B3GALT1
B3GALT2
B3GALT5
FUT1
FUT2
FUT3
ST3GAL4
ABO
FUT5
FUT6
FUT7
ST3GAL6
ST8SIA1
A4GALT
B3GALNT1
B3GNT4
GCNT2
A3GALT2
GBGT1
NAGA
B4GALNT1
B3GALT4
ST8SIA5
ST3GAL5
SLC33A1
ST6GALNAC5
ST6GALNAC6
ACYP2
ACYP1
ACOT12
LDHD
GLO1
HAGH
ME2
ME3
ME1
HAO2
HAO1
PGP
HYI
ACSS3
ECHDC1
ACSM1
ACSM2A
ACSM4
ACSM5
ACSM3
ACSM2B
ACSM6
L2HGDH
BDH1
BDH2
DHFR
DHFR2
MTHFD1L
MTHFD1
MTHFD2
MTHFD2L
MTFMT
ALDH1L1
ALDH1L2
MTHFR
MTHFS
ST20-MTHFS
NFS1
ALPL
ALPI
ALPP
ALPG
ACP1
TPK1
THTPA
RFK
ACP5
ACP2
FLAD1
BLVRB
PNPO
PDXK
PDXP
PHOSPHO2
ASPDH
QPRT
NAPRT
NMRK1
NMRK2
NMNAT3
NMNAT1
NMNAT2
NUDT12
NADSYN1
NAMPT
CD38
BST1
SIRT1
SIRT2
SIRT3
SIRT4
SIRT5
SIRT6
SIRT7
NADK
NADK2
NNT
NNMT
PANK1
PANK3
PANK2
PPCS
PPCDC
COASY
AASDHPPT
VNN1
VNN2
HLCS
BTD
LIPT2
LIAS
LIPT1
GCH1
FPGS
GGH
PTS
SPR
QDPR
PCBD2
PCBD1
MOCS1
MOCS2
GPHN
MOCOS
BCO1
DHRS3
DHRS4
DHRS4L2
DHRS9
RDH8
RDH10
RDH11
RDH12
RDH13
RDH16
SDR16C5
LRAT
AWAT2
PNPLA4
RPE65
RDH5
ALDH1A2
ALDH1A1
ALDH1A3
CYP26A1
CYP26B1
CYP26C1
CYP2C18
CYP2S1
CYP2W1
RETSAT
CYP27C1
EARS2
EPRS1
ALAD
HMBS
UROS
UROD
CPOX
PPOX
FECH
MMAB
HMOX1
HMOX2
BLVRA
HCCS
CP
HEPH
HEPHL1
FXN
HMGCR
MVK
PMVK
MVD
IDI1
IDI2
FDPS
GGPS1
PDSS1
PDSS2
DHDDS
NUS1
FNTA
FNTB
RCE1
ZMPSTE24
ICMT
PCYOX1
CA13
CA1
CA6
CA7
CA12
CA5B
CA14
CA9
CA3
CA5A
CA8
CA2
CA4
BPNT1
BPNT2
SUOX
SQOR
ETHE1
SELENBP1
TRNA
TRNR
TRNN
TRND
TRNC
TRNQ
TRNE
TRNG
TRNH
TRNI
TRNL2
TRNL1
TRNK
TRNM
TRNF
TRNP
TRNS2
TRNS1
TRNT
TRNW
TRNY
TRNV
QRSL1
GATB
GATC
QARS1
AARS2
AARS1
DARS1
DARS2
NARS2
NARS1
GARS1
TARS2
TARS1
TARS3
SARS2
SARS1
CARS1
CARS2
VARS2
VARS1
LARS1
LARS2
IARS1
IARS2
KARS1
RARS2
RARS1
PARS2
HARS1
HARS2
FARSA
FARS2
FARSB
YARS1
YARS2
WARS2
WARS1
EPHX1
SULT2A1
CYP2F1
CYP2A13
CYP2D6
cytochrome P450 2D6-like [KO:K17712] [EC:1.14.14.1]
CYP2D7
AKR7A2
AKR7A3
AKR7L
FMO1
FMO2
FMO5
FMO3
FMO4
TPMT
CES1
CES2
MPO
SCD
SCD5
FADS1
Metabolism-related genes download source (PMID:35873461)
pathway_id	pathway_name	entrezgene_id	hgnc_symbol
hsa00010	Glycolysis / Gluconeogenesis - Homo sapiens (human)	3101,3098,3099,80201,2645,2821,5213,5214,5211,2203,8789,230,226,229,7167,2597,26330,5232,5230,5223,5224,441531,2027,2026,2023,387712,5315,5313,5161,5160,5162,1737,1738,160287,92483,3939,3945,3948,124,125,126,131,127,128,130,10327,217,224,219,501,223,221,222,218,84532,55902,130589,5236,55276,2538,57818,92579,83440,669,9562,5105,5106	HK3,HK1,HK2,HKDC1,GCK,GPI,PFKM,PFKP,PFKL,FBP1,FBP2,ALDOC,ALDOA,ALDOB,TPI1,GAPDH,GAPDHS,PGK2,PGK1,PGAM1,PGAM2,PGAM4,ENO3,ENO2,ENO1,ENO4,PKM,PKLR,PDHA2,PDHA1,PDHB,DLAT,DLD,LDHAL6A,LDHAL6B,LDHA,LDHB,LDHC,ADH1A,ADH1B,ADH1C,ADH7,ADH4,ADH5,ADH6,AKR1A1,ALDH2,ALDH3A2,ALDH1B1,ALDH7A1,ALDH9A1,ALDH3B1,ALDH3B2,ALDH3A1,ACSS1,ACSS2,GALM,PGM1,PGM2,G6PC1,G6PC2,G6PC3,ADPGK,BPGM,MINPP1,PCK1,PCK2
hsa00020	Citrate cycle (TCA cycle) - Homo sapiens (human)	1431,47,50,48,3417,3418,3420,3421,3419,55753,4967,1743,1738,8802,8801,8803,6389,6390,6391,6392,2271,4190,4191,5091,5105,5106,5161,5160,5162,1737	CS,ACLY,ACO2,ACO1,IDH1,IDH2,IDH3B,IDH3G,IDH3A,OGDHL,OGDH,DLST,DLD,SUCLG1,SUCLG2,SUCLA2,SDHA,SDHB,SDHC,SDHD,FH,MDH1,MDH2,PC,PCK1,PCK2,PDHA2,PDHA1,PDHB,DLAT
hsa00030	Pentose phosphate pathway - Homo sapiens (human)	2.82125e+130	GPI,G6PD,PGLS,H6PD,PGD,RPE,RPEL1,TKT,TKTL2,TKTL1,TALDO1,RPIA,DERA,RBKS,PGM1,PGM2,PRPS1L1,PRPS2,PRPS1,RGN,IDNK,GLYCTK,ALDOC,ALDOA,ALDOB,FBP1,FBP2,PFKM,PFKP,PFKL
hsa00040	Pentose and glucuronate interconversions - Homo sapiens (human)	2.99094e+158	GUSB,KL,UGT2A1,UGT2A3,UGT2B17,UGT2B11,UGT2B28,UGT1A6,UGT1A4,UGT1A1,UGT1A3,UGT2B10,UGT1A9,UGT2B7,UGT1A10,UGT1A8,UGT1A5,UGT2B15,UGT1A7,UGT2B4,UGT2A2,UGDH,UGP2,AKR1A1,CRYL1,RPE,RPEL1,XYLB,AKR1B1,AKR1B10,DCXR,SORD,DHDH,CRPPA
hsa00051	Fructose and mannose metabolism - Homo sapiens (human)	4.35154e+136	MPI,PMM2,PMM1,GMPPB,GMPPA,GMDS,GFUS,FPGT,FCSK,ENOSF1,HK3,HK1,HK2,HKDC1,PFKM,PFKP,PFKL,FBP1,FBP2,PFKFB1,PFKFB2,PFKFB3,PFKFB4,TIGAR,KHK,SORD,AKR1B1,AKR1B10,ALDOC,ALDOA,ALDOB,TPI1,TKFC
hsa00052	Galactose metabolism - Homo sapiens (human)	1.30589e+130	GALM,GALK1,GALT,GALE,UGP2,PGM1,PGM2,HK3,HK1,HK2,HKDC1,GCK,G6PC1,G6PC2,G6PC3,GLB1,LCT,LALBA,B4GALT1,B4GALT2,GLA,AKR1B1,AKR1B10,PFKM,PFKP,PFKL,MGAM,MGAM2,GAA,GANC,SI
hsa00053	Ascorbate and aldarate metabolism - Homo sapiens (human)	7.35811e+131	UGDH,UGT2A1,UGT2A3,UGT2B17,UGT2B11,UGT2B28,UGT1A6,UGT1A4,UGT1A1,UGT1A3,UGT2B10,UGT1A9,UGT2B7,UGT1A10,UGT1A8,UGT1A5,UGT2B15,UGT1A7,UGT2B4,UGT2A2,GUSB,KL,MIOX,AKR1A1,RGN,ALDH2,ALDH3A2,ALDH1B1,ALDH7A1,ALDH9A1
hsa00061	Fatty acid biosynthesis - Homo sapiens (human)	31,32,197322,27349,2194,54995,84869,7923,109703458,51102,55301,23305,2182,2180,51703,2181,23205,81616	ACACA,ACACB,ACSF3,MCAT,FASN,OXSM,CBR4,HSD17B8,HTD2,MECR,OLAH,ACSL6,ACSL4,ACSL1,ACSL5,ACSL3,ACSBG1,ACSBG2
hsa00062	Fatty acid elongation - Homo sapiens (human)	1.04493e+131	ACAA2,HADHB,HADH,HADHA,ECHS1,MECR,PPT1,PPT2,ELOVL1,ELOVL2,ELOVL3,ELOVL4,ELOVL5,ELOVL6,ELOVL7,HSD17B12,HACD2,HACD1,HACD4,HACD3,TECR,ACOT4,ACOT2,ACOT1,ACOT7,THEM4,THEM5
hsa00071	Fatty acid degradation - Homo sapiens (human)	39,38,30,10449,3032,3033,3030,1962,1892,8310,51,35,34,33,36,37,2639,23305,2182,2180,51703,2181,23205,81616,1374,1375,126129,1376,1632,10455,113612,124,125,126,131,127,128,130,217,224,219,501,223	ACAT2,ACAT1,ACAA1,ACAA2,HADHB,HADH,HADHA,EHHADH,ECHS1,ACOX3,ACOX1,ACADS,ACADM,ACADL,ACADSB,ACADVL,GCDH,ACSL6,ACSL4,ACSL1,ACSL5,ACSL3,ACSBG1,ACSBG2,CPT1A,CPT1B,CPT1C,CPT2,ECI1,ECI2,CYP2U1,ADH1A,ADH1B,ADH1C,ADH7,ADH4,ADH5,ADH6,ALDH2,ALDH3A2,ALDH1B1,ALDH7A1,ALDH9A1
hsa00100	Steroid biosynthesis - Homo sapiens (human)	2.22267e+84	FDFT1,SQLE,LSS,CYP51A1,TM7SF2,LBR,MSMO1,NSDHL,HSD17B7,EBP,DHCR24,SC5D,DHCR7,LIPA,CEL,SOAT2,SOAT1,CYP2R1,CYP27B1,CYP24A1
hsa00120	Primary bile acid biosynthesis - Homo sapiens (human)	1.08585e+72	CYP46A1,CYP39A1,HSD3B7,CH25H,CYP7B1,CYP7A1,CYP27A1,CYP8B1,AKR1D1,AKR1C4,SLC27A5,AMACR,ACOX2,HSD17B4,SCP2,ACOT8,BAAT
hsa00130	Ubiquinone and other terpenoid-quinone biosynthesis - Homo sapiens (human)	6.89827e+51	TAT,COQ2,COQ6,COQ3,COQ5,COQ7,NQO1,GGCX,VKORC1,VKORC1L1,HPD
hsa00140	Steroid hormone biosynthesis - Homo sapiens (human)	1583,1586,412,6820,1589,3283,3284,6715,6716,79644,1646,8644,1584,1585,6718,1109,3290,374875,3291,1645,9420,6783,3292,3294,8630,51478,7923,51144,79154,1543,1544,1577,1551,100861540,1571,1576,1545,1588,1581,10941,79799,7367,10720,54490,54578,54657,54658,54659,7365,54600,7364,54575,54576,54579,7366,54577,7363,574537,1312,220074,3293	CYP11A1,CYP17A1,STS,SULT2B1,CYP21A2,HSD3B1,HSD3B2,SRD5A1,SRD5A2,SRD5A3,AKR1C2,AKR1C3,CYP11B1,CYP11B2,AKR1D1,AKR1C4,HSD11B1,HSD11B1L,HSD11B2,AKR1C1,CYP7B1,SULT1E1,HSD17B1,HSD17B2,HSD17B6,HSD17B7,HSD17B8,HSD17B12,DHRS11,CYP1A1,CYP1A2,CYP3A5,CYP3A7,CYP3A7-CYP3A51P,CYP2E1,CYP3A4,CYP1B1,CYP19A1,CYP7A1,UGT2A1,UGT2A3,UGT2B17,UGT2B11,UGT2B28,UGT1A6,UGT1A4,UGT1A1,UGT1A3,UGT2B10,UGT1A9,UGT2B7,UGT1A10,UGT1A…
hsa00190	Oxidative phosphorylation - Homo sapiens (human)	4535,4536,4537,4538,4539,4540,4541,4719,4720,4722,4724,4725,4726,374291,4728,4723,4729,4731,4694,4695,4696,4697,56901,4698,4700,4701,4702,4704,4705,4706,126328,55967,51079,4707,4708,4709,4710,4711,4712,4713,4714,4715,4716,54539,4717,4718,100532726,6389,6390,6391,6392,7386,4519,1537,7384,7385,7388,440567,7381,27089,29796,10975,1352,4514,4512,4513,84701,1327,9377,1329,1337,1339,1340,125965,1345,134…	ND1,ND2,ND3,ND4,ND4L,ND5,ND6,NDUFS1,NDUFS2,NDUFS3,NDUFS4,NDUFS5,NDUFS6,NDUFS7,NDUFS8,NDUFV1,NDUFV2,NDUFV3,NDUFA1,NDUFA2,NDUFA3,NDUFA4,NDUFA4L2,NDUFA5,NDUFA6,NDUFA7,NDUFA8,NDUFA9,NDUFA10,NDUFAB1,NDUFA11,NDUFA12,NDUFA13,NDUFB1,NDUFB2,NDUFB3,NDUFB4,NDUFB5,NDUFB6,NDUFB7,NDUFB8,NDUFB9,NDUFB10,NDUFB11,NDUFC1,NDUFC2,NDUFC2-KCTD14,SDHA,SDHB,SDHC,SDHD,UQCRFS1,CYTB,CYC1,UQCRC1,UQCRC2,UQCRH,UQCRHL,UQCRB,UQC…
hsa00220	Arginine biosynthesis - Homo sapiens (human)	5009,445,435,384,383,4842,4843,4846,27165,2744,2752,2747,2746,1373,2805,137362,2806,84706,2875,162417,95,100526760	OTC,ASS1,ASL,ARG2,ARG1,NOS1,NOS2,NOS3,GLS2,GLS,GLUL,GLUD2,GLUD1,CPS1,GOT1,GOT1L1,GOT2,GPT2,GPT,NAGS,ACY1,ABHD14A-ACY1
hsa00230	Purine metabolism - Homo sapiens (human)	53343,56985,11164,5236,55276,221823,5634,5631,5471,2618,5198,10606,158,471,353,22978,84618,93034,30833,56953,100526794,4907,4860,3251,3614,3615,10201,29922,4831,4833,4830,4832,654364,221264,956,377841,953,124583,9583,957,955,131870,3704,7498,318,8833,2766,51292,9615,2987,6240,50484,6241,51020,1716,1633,374659,58497,107,108,109,196883,111,112,113,114,115,55811,2977,2982,2983,2984,3000,2986,4881,48…	NUDT9,ADPRM,NUDT5,PGM1,PGM2,PRPS1L1,PRPS2,PRPS1,PPAT,GART,PFAS,PAICS,ADSL,ATIC,APRT,NT5C2,NT5C1A,NT5C1B,NT5C,NT5M,NT5C1B-RDH14,NT5E,PNP,HPRT1,IMPDH1,IMPDH2,NME6,NME7,NME2,NME4,NME1,NME3,NME1-NME2,AK9,ENTPD3,ENTPD8,ENTPD1,CANT1,ENTPD4,ENTPD5,ENTPD6,NUDT16,ITPA,XDH,NUDT2,GMPS,GMPR,GMPR2,GDA,GUK1,RRM1,RRM2B,RRM2,HDDC2,DGUOK,DCK,HDDC3,PRUNE1,ADCY1,ADCY2,ADCY3,ADCY4,ADCY5,ADCY6,ADCY7,ADCY8,ADCY9,ADCY1…
hsa00232	Caffeine metabolism - Homo sapiens (human)	1544,10,9,1548,1549,7498	CYP1A2,NAT2,NAT1,CYP2A6,CYP2A7,XDH
hsa00240	Pyrimidine metabolism - Homo sapiens (human)	790,1723,7372,51727,129607,10201,29922,4831,4833,4830,4832,654364,221264,956,377841,953,124583,9583,957,955,5167,5169,8623,318,1503,56474,83549,7371,54963,22978,84618,93034,30833,56953,100526794,4907,151531,7378,1806,1807,51733,51251,115024,978,6240,50484,6241,79077,51020,1633,1635,1841,1854,4860,1890,7084,7083,7298	CAD,DHODH,UMPS,CMPK1,CMPK2,NME6,NME7,NME2,NME4,NME1,NME3,NME1-NME2,AK9,ENTPD3,ENTPD8,ENTPD1,CANT1,ENTPD4,ENTPD5,ENTPD6,ENPP1,ENPP3,ASMTL,NUDT2,CTPS1,CTPS2,UCK1,UCK2,UCKL1,NT5C2,NT5C1A,NT5C1B,NT5C,NT5M,NT5C1B-RDH14,NT5E,UPP2,UPP1,DPYD,DPYS,UPB1,NT5C3A,NT5C3B,CDA,RRM1,RRM2B,RRM2,DCTPP1,HDDC2,DCK,DCTD,DTYMK,DUT,PNP,TYMP,TK2,TK1,TYMS
hsa00250	Alanine, aspartate and glutamate metabolism - Homo sapiens (human)	2805,137362,2806,259307,8528,80150,440,56954,84706,2875,189,64902,445,435,122622,159,158,339983,57494,284716,2346,443,2571,2572,18,7915,2747,2746,8659,2752,790,27165,2744,1373,9945,2673,5471	GOT1,GOT1L1,GOT2,IL4I1,DDO,ASRGL1,ASNS,NIT2,GPT2,GPT,AGXT,AGXT2,ASS1,ASL,ADSS1,ADSS2,ADSL,NAT8L,RIMKLB,RIMKLA,FOLH1,ASPA,GAD1,GAD2,ABAT,ALDH5A1,GLUD2,GLUD1,ALDH4A1,GLUL,CAD,GLS2,GLS,CPS1,GFPT2,GFPT1,PPAT
hsa00260	Glycine, serine and threonine metabolism - Homo sapiens (human)	6.47265e+171	SHMT2,SHMT1,AGXT,GRHPR,GLYCTK,PGAM1,PGAM2,PGAM4,BPGM,PHGDH,PSAT1,PSPH,GCAT,ALAS1,ALAS2,MAOB,MAOA,AOC3,AOC2,GLDC,AMT,DLD,GCSH,DAO,AGXT2,GATM,GAMT,CHDH,ALDH7A1,BHMT,DMGDH,PIPOX,SARDH,GNMT,CBS,CBS,CTH,SDS,SDSL,SRR
hsa00270	Cysteine and methionine metabolism - Homo sapiens (human)	1491,56267,883,875,102724560,635,23743,4548,27430,4143,4144,262,6723,6611,4507,84245,51074,58478,55256,6898,259307,1786,1788,1789,23382,10768,191,587,586,64902,2729,2730,2937,1036,2805,137362,2806,4357,7263,160287,92483,3939,3945,3948,4190,4191,10993,113675,26227,29968	CTH,KYAT3,KYAT1,CBS,CBS,BHMT,BHMT2,MTR,MAT2B,MAT1A,MAT2A,AMD1,SRM,SMS,MTAP,MRI1,APIP,ENOPH1,ADI1,TAT,IL4I1,DNMT1,DNMT3A,DNMT3B,AHCYL2,AHCYL1,AHCY,BCAT2,BCAT1,AGXT2,GCLC,GCLM,GSS,CDO1,GOT1,GOT1L1,GOT2,MPST,TST,LDHAL6A,LDHAL6B,LDHA,LDHB,LDHC,MDH1,MDH2,SDS,SDSL,PHGDH,PSAT1
hsa00280	Valine, leucine and isoleucine degradation - Homo sapiens (human)	587,586,259307,593,594,1629,1738,35,34,3712,36,27034,3030,1962,1892,3033,3028,30,10449,3032,5095,5096,84693,4594,26275,11112,4329,217,224,219,501,223,316,197322,18,64902,56922,64087,549,3155,54511,5019,64064,65985,39,38,3157,3158	BCAT2,BCAT1,IL4I1,BCKDHA,BCKDHB,DBT,DLD,ACADS,ACADM,IVD,ACADSB,ACAD8,HADHA,EHHADH,ECHS1,HADH,HSD17B10,ACAA1,ACAA2,HADHB,PCCA,PCCB,MCEE,MMUT,HIBCH,HIBADH,ALDH6A1,ALDH2,ALDH3A2,ALDH1B1,ALDH7A1,ALDH9A1,AOX1,ACSF3,ABAT,AGXT2,MCCC1,MCCC2,AUH,HMGCL,HMGCLL1,OXCT1,OXCT2,AACS,ACAT2,ACAT1,HMGCS1,HMGCS2
hsa00290	Valine, leucine and isoleucine biosynthesis - Homo sapiens (human)	1.09931e+16	SDS,SDSL,BCAT2,BCAT1
hsa00310	Lysine degradation - Homo sapiens (human)	10157,501,51166,55526,1743,1738,2639,3030,1962,1892,3033,39,38,123688,85007,51268,79823,4297,8085,58508,9757,55904,23067,9739,80854,56979,11105,55870,56950,64754,150572,6839,79723,10919,79813,9869,83852,7799,2145,2146,6419,64324,7468,54904,29072,84444,387893,93166,84787,51111,2122,63976,55217,217,224,219,223,8424,5351,5352,8985,79709,23127	AASS,ALDH7A1,AADAT,DHTKD1,DLST,DLD,GCDH,HADHA,EHHADH,ECHS1,HADH,ACAT2,ACAT1,HYKK,PHYKPL,PIPOX,CAMKMT,KMT2A,KMT2D,KMT2C,KMT2B,KMT2E,SETD1B,SETD1A,SETD7,PRDM9,PRDM7,ASH1L,SMYD2,SMYD3,SMYD1,SUV39H1,SUV39H2,EHMT2,EHMT1,SETDB1,SETDB2,PRDM2,EZH1,EZH2,SETMAR,NSD1,NSD2,NSD3,SETD2,DOT1L,KMT5A,PRDM6,KMT5C,KMT5B,MECOM,PRDM16,TMLHE,ALDH2,ALDH3A2,ALDH1B1,ALDH9A1,BBOX1,PLOD1,PLOD2,PLOD3,COLGALT1,COLGALT2
hsa00330	Arginine and proline metabolism - Homo sapiens (human)	2628,2593,1158,548596,1160,1152,1159,113451,79814,4953,6723,6611,262,26,54498,217,224,219,501,223,84735,55748,57571,112483,6303,4129,4128,4842,4843,4846,384,383,4942,65263,29920,5831,5625,102724788,8659,5832,51056,8974,283208,5033,58510,2805,137362,2806,112817,1610,112849	GATM,GAMT,CKM,CKMT1A,CKMT2,CKB,CKMT1B,AZIN2,AGMAT,ODC1,SRM,SMS,AMD1,AOC1,SMOX,ALDH2,ALDH3A2,ALDH1B1,ALDH7A1,ALDH9A1,CNDP1,CNDP2,CARNS1,SAT2,SAT1,MAOB,MAOA,NOS1,NOS2,NOS3,ARG2,ARG1,OAT,PYCR3,PYCR2,PYCR1,PRODH,proline dehydrogenase 1, mitochondrial [KO:K00318] [EC:1.5.5.2],ALDH4A1,ALDH18A1,LAP3,P4HA2,P4HA3,P4HA1,PRODH2,GOT1,GOT1L1,GOT2,HOGA1,DAO,L3HYPDH
hsa00340	Histidine metabolism - Homo sapiens (human)	3034,131669,144193,10841,3067,26,217,224,219,501,223,443,3176,4129,4128,221,222,218,57571,138199,55748,84735	HAL,UROC1,AMDHD1,FTCD,HDC,AOC1,ALDH2,ALDH3A2,ALDH1B1,ALDH7A1,ALDH9A1,ASPA,HNMT,MAOB,MAOA,ALDH3B1,ALDH3B2,ALDH3A1,CARNS1,CARNMT1,CNDP2,CNDP1
hsa00350	Tyrosine metabolism - Homo sapiens (human)	2.80514e+138	GOT1,GOT1L1,GOT2,TAT,IL4I1,HPD,HGD,GSTZ1,FAH,TYR,TH,DCT,TYRP1,DDC,DBH,PNMT,COMT,LRTOMT,MAOB,MAOA,AOC3,AOC2,ALDH3B1,ALDH3B2,ALDH3A1,ADH1A,ADH1B,ADH1C,ADH7,ADH4,ADH5,ADH6,TPO,AOX1,FAHD1,MIF
hsa00360	Phenylalanine metabolism - Homo sapiens (human)	5.05316e+68	PAH,DDC,AOC3,AOC2,MAOB,MAOA,ALDH3B1,ALDH3B2,ALDH3A1,GOT1,GOT1L1,GOT2,TAT,IL4I1,HPD,MIF,GLYAT
hsa00380	Tryptophan metabolism - Homo sapiens (human)	6999,3620,169355,125061,8564,8942,23498,130013,64577,55526,1743,1738,2639,3030,1962,1892,3033,39,38,56267,883,51166,121278,7166,1644,4129,4128,217,224,219,501,223,316,438,15,1543,1544,1545,11185,259307,26,847	TDO2,IDO1,IDO2,AFMID,KMO,KYNU,HAAO,ACMSD,ALDH8A1,DHTKD1,DLST,DLD,GCDH,HADHA,EHHADH,ECHS1,HADH,ACAT2,ACAT1,KYAT3,KYAT1,AADAT,TPH2,TPH1,DDC,MAOB,MAOA,ALDH2,ALDH3A2,ALDH1B1,ALDH7A1,ALDH9A1,AOX1,ASMT,AANAT,CYP1A1,CYP1A2,CYP1B1,INMT,IL4I1,AOC1,CAT
hsa00400	Phenylalanine, tyrosine and tryptophan biosynthesis - Homo sapiens (human)	2.80514e+27	GOT1,GOT1L1,GOT2,TAT,IL4I1,PAH
hsa00410	beta-Alanine metabolism - Homo sapiens (human)	339896,51380,2571,2572,84735,57571,55748,18,54498,8639,314,217,224,219,501,223,221,222,218,1806,1807,51733,26275,3030,1962,1892,35,8310,51,23417,4329	GADL1,CSAD,GAD1,GAD2,CNDP1,CARNS1,CNDP2,ABAT,SMOX,AOC3,AOC2,ALDH2,ALDH3A2,ALDH1B1,ALDH7A1,ALDH9A1,ALDH3B1,ALDH3B2,ALDH3A1,DPYD,DPYS,UPB1,HIBCH,HADHA,EHHADH,ECHS1,ACADS,ACOX3,ACOX1,MLYCD,ALDH6A1
hsa00430	Taurine and hypotaurine metabolism - Homo sapiens (human)	1.03626e+48	CDO1,GAD1,GAD2,GADL1,CSAD,ADO,GGT7,GGT6,GGT1,GGT5,BAAT
hsa00440	Phosphonate and phosphinate metabolism - Homo sapiens (human)	5.83385e+26	PCYT2,SELENOI,CEPT1,PCYT1B,PCYT1A,CHPT1
hsa00450	Selenocompound metabolism - Homo sapiens (human)	5.62679e+78	KYAT3,KYAT1,MTR,CTH,SCLY,TXNRD1,TXNRD3,TXNRD2,INMT,PAPSS2,PAPSS1,SEPHS2,SEPHS1,PSTK,SEPSECS,MARS1,MARS2
hsa00470	D-Amino acid metabolism - Homo sapiens (human)	2.71653e+26	GLS2,GLS,DGLUCY,DDO,SRR,DAO
hsa00480	Glutathione metabolism - Homo sapiens (human)	2686,124975,2678,2687,79017,79094,494143,26873,2729,2730,2937,51056,290,221357,2939,2941,119391,2948,2953,2952,2947,4257,4259,2944,2949,4258,2938,2946,2940,9446,653689,2950,373156,27306,10314,9027,51471,2936,3417,3418,5226,2539,51060,2879,257202,2882,2877,2878,2876,2880,493869,9588,4953,6723,6611,6240,50484,6241	GGT7,GGT6,GGT1,GGT5,GGCT,CHAC1,CHAC2,OPLAH,GCLC,GCLM,GSS,LAP3,ANPEP,GSTA5,GSTA2,GSTA4,GSTO2,GSTM4,GSTT2,GSTT1,GSTM3,MGST1,MGST3,GSTM1,GSTM5,MGST2,GSTA1,GSTM2,GSTA3,GSTO1,GSTT2B,GSTP1,GSTK1,HPGDS,LANCL1,NAT8,NAT8B,GSR,IDH1,IDH2,PGD,G6PD,TXNDC12,GPX4,GPX6,GPX7,GPX2,GPX3,GPX1,GPX5,GPX8,PRDX6,ODC1,SRM,SMS,RRM1,RRM2B,RRM2
hsa00500	Starch and sucrose metabolism - Homo sapiens (human)	8.97293e+146	MGAM,MGAM2,GAA,GANC,SI,UGP2,ENPP1,ENPP3,GBA3,GYS2,GYS1,GYG1,GYG2,GBE1,PYGL,PYGM,PYGB,AGL,AMY1C,AMY2A,AMY1A,AMY2B,AMY1B,TREH,PGM1,PGM2,HK3,HK1,HK2,HKDC1,GCK,G6PC1,G6PC2,G6PC3,PGM2L1,GPI
hsa00510	N-Glycan biosynthesis - Homo sapiens (human)	79644,22845,1798,29880,79868,199857,8813,8818,54344,56052,85365,440138,10195,79796,79087,29929,79053,84920,144245,3703,201595,6184,6185,1603,7991,1650,57171,7841,23193,11253,10905,57134,4121,4245,4124,4122,4247,2530,2683,8704,8703,6480,84620,4248,11320,11282,152586,4249,146664,25834	SRD5A3,DOLK,DPAGT1,ALG5,ALG13,ALG14,DPM1,DPM2,DPM3,ALG1,ALG2,ALG11,ALG3,ALG9,ALG12,ALG6,ALG8,ALG10,ALG10B,STT3A,STT3B,RPN1,RPN2,DAD1,TUSC3,DDOST,DOLPP1,MOGS,GANAB,MAN1B1,MAN1A2,MAN1C1,MAN1A1,MGAT1,MAN2A1,MAN2A2,MGAT2,FUT8,B4GALT1,B4GALT2,B4GALT3,ST6GAL1,ST6GAL2,MGAT3,MGAT4A,MGAT4B,MGAT4D,MGAT5,MGAT5B,MGAT4C
hsa00511	Other glycan degradation - Homo sapiens (human)	4.75811e+78	NEU1,NEU3,NEU4,NEU2,GLB1,HEXA,HEXB,HEXD,MAN2C1,MAN2B1,MAN2B2,MANBA,ENGASE,FUCA1,FUCA2,AGA,GBA,GBA2
hsa00512	Mucin type O-glycan biosynthesis - Homo sapiens (human)	4.42117e+182	GALNTL6,GALNT5,GALNT17,GALNT11,GALNT12,GALNT13,GALNT14,GALNT16,GALNT15,GALNT18,GALNTL5,GALNT10,GALNT2,GALNT3,GALNT1,GALNT6,GALNT4,GALNT9,GALNT7,GALNT8,POC1B-GALNT4,C1GALT1,C1GALT1C1,C1GALT1C1L,GCNT1,GCNT3,GCNT4,ST3GAL1,ST3GAL2,ST6GALNAC1,ST6GALNAC2,ST6GALNAC3,ST6GALNAC4,B3GNT3,B3GNT6,B4GALT5
hsa00513	Various types of N-glycan biosynthesis - Homo sapiens (human)	7.98682e+183	ALG13,ALG14,ALG1,ALG2,ALG11,ALG3,ALG9,ALG12,STT3A,STT3B,RPN1,RPN2,DAD1,TUSC3,DDOST,MAN1B1,MAN1A2,MAN1C1,MAN1A1,MGAT1,MAN2A1,MAN2A2,MGAT2,HEXA,HEXB,FUT8,HEXD,MGAT4C,MGAT4A,MGAT4B,MGAT4D,B4GALT1,B4GALT2,B4GALT3,ST3GAL3,B4GALNT3,B4GALNT4,CHST8,CHST9
hsa00514	Other types of O-glycan biosynthesis - Homo sapiens (human)	8473,285203,23509,23275,4242,3955,5986,2683,8704,8703,6480,84620,6487,145173,56983,283464,727936,152002,79709,23127,8985,10585,29954,442117,11227,64409,63917,79695,114805,79623,57452,117248,374378,168391,55568,2590,2591,2589,11226,8693,50614,51809,26290,100528030,56913,29071,728819	OGT,EOGT,POFUT1,POFUT2,MFNG,LFNG,RFNG,B4GALT1,B4GALT2,B4GALT3,ST6GAL1,ST6GAL2,ST3GAL3,B3GLCT,POGLUT1,GXYLT1,GXYLT2,XXYLT1,COLGALT1,COLGALT2,PLOD3,POMT1,POMT2,GALNTL6,GALNT5,GALNT17,GALNT11,GALNT12,GALNT13,GALNT14,GALNT16,GALNT15,GALNT18,GALNTL5,GALNT10,GALNT2,GALNT3,GALNT1,GALNT6,GALNT4,GALNT9,GALNT7,GALNT8,POC1B-GALNT4,C1GALT1,C1GALT1C1,C1GALT1C1L
hsa00515	Mannose type O-glycan biosynthesis - Homo sapiens (human)	1.05853e+111	POMT1,POMT2,POMGNT1,B4GALT1,B4GALT2,B4GALT3,ST3GAL3,B3GAT1,B3GAT2,CHST10,FUT9,FUT4,MGAT5B,POMGNT2,B3GALNT2,POMK,CRPPA,FKTN,FKRP,RXYLT1,B4GAT1,LARGE1,LARGE2
hsa00520	Amino sugar and nucleotide sugar metabolism - Homo sapiens (human)	27159,1118,3073,3074,55577,51005,10007,132789,3101,3098,3099,80201,9945,2673,64841,5238,2585,6675,91373,10020,5973,54187,140838,80896,55907,51706,1727,51700,606495,51167,80146,2645,5236,55276,7360,7358,2584,2592,2582,2821,4351,5373,5372,29925,29926,2762,7264,197258,8790	CHIA,CHIT1,HEXA,HEXB,NAGK,AMDHD2,GNPDA1,GNPDA2,HK3,HK1,HK2,HKDC1,GFPT2,GFPT1,GNPNAT1,PGM3,GALK2,UAP1,UAP1L1,GNE,RENBP,NANS,NANP,NPL,CMAS,CYB5R1,CYB5R3,CYB5R2,CYB5RL,CYB5R4,UXS1,GCK,PGM1,PGM2,UGP2,UGDH,GALK1,GALT,GALE,GPI,MPI,PMM2,PMM1,GMPPB,GMPPA,GMDS,GFUS,FCSK,FPGT
hsa00524	Neomycin, kanamycin and gentamicin biosynthesis - Homo sapiens (human)	3.10131e+20	HK3,HK1,HK2,HKDC1,GCK
hsa00531	Glycosaminoglycan degradation - Homo sapiens (human)	8.69234e+79	HYAL2,HYAL1,SPAM1,HYAL4,HYAL3,GUSB,IDS,IDUA,ARSB,HPSE,HPSE2,SGSH,HGSNAT,NAGLU,GALNS,GLB1,GNS,HEXA,HEXB
hsa00532	Glycosaminoglycan biosynthesis - chondroitin sulfate / dermatan sulfate - Homo sapiens (human)	6.41316e+102	XYLT1,XYLT2,B4GALT7,B3GALT6,B3GAT3,CSGALNACT1,CSGALNACT2,CHSY3,CHSY1,CHPF,CHPF2,DSE,CHST11,CHST12,CHST13,CHST3,CHST7,CHST15,UST,CHST14
hsa00533	Glycosaminoglycan biosynthesis - keratan sulfate - Homo sapiens (human)	2.53027e+58	FUT8,B4GALT1,B4GALT2,B4GALT3,B3GNT2,CHST6,B4GALT4,B3GNT7,CHST1,ST3GAL3,CHST2,CHST4,ST3GAL1,ST3GAL2
hsa00534	Glycosaminoglycan biosynthesis - heparan sulfate / heparin - Homo sapiens (human)	6.41316e+108	XYLT1,XYLT2,B4GALT7,B3GALT6,B3GAT3,EXTL2,EXTL3,EXTL1,EXT1,EXT2,NDST1,NDST2,NDST3,NDST4,GLCE,HS2ST1,HS6ST1,HS6ST2,HS6ST3,HS3ST1,HS3ST2,HS3ST3B1,HS3ST3A1,HS3ST5
hsa00561	Glycerolipid metabolism - Homo sapiens (human)	132158,217,224,219,501,223,231,57016,10327,26007,2712,2710,57678,150763,137964,84803,10554,10555,56894,56895,55326,253558,154141,129642,8611,8613,8612,23175,64900,9663,84513,196051,8525,8527,9162,1606,8526,1607,160851,1608,1609,139189,8694,84649,346606,1056,57104,80339,5406,5407,5408,119548,3990,8513,9388,4023,55750,11343,116255,80168,2717	GLYCTK,ALDH2,ALDH3A2,ALDH1B1,ALDH7A1,ALDH9A1,AKR1B1,AKR1B10,AKR1A1,TKFC,GK2,GK,GPAM,GPAT2,GPAT4,GPAT3,AGPAT1,AGPAT2,AGPAT3,AGPAT4,AGPAT5,LCLAT1,MBOAT1,MBOAT2,PLPP1,PLPP3,PLPP2,LPIN1,LPIN3,LPIN2,PLPP5,PLPP4,DGKZ,DGKD,DGKI,DGKA,DGKE,DGKB,DGKH,DGKG,DGKQ,DGKK,DGAT1,DGAT2,MOGAT3,CEL,PNPLA2,PNPLA3,PNLIP,PNLIPRP1,PNLIPRP2,PNLIPRP3,LIPC,LIPF,LIPG,LPL,AGK,MGLL,MOGAT1,MOGAT2,GLA
hsa00562	Inositol phosphate metabolism - Homo sapiens (human)	5289,4534,8776,8898,8897,9110,55613,9107,9108,64419,5297,5298,55361,55300,22908,22876,23396,8394,8395,138429,4952,3633,56623,8867,8871,5290,5293,5291,5294,5728,3635,3636,5288,5286,5287,3631,8821,200576,9896,79837,5305,8396,23236,5330,5331,5332,5333,113026,84812,51196,5335,5336,89869,23007,9651,3613,3612,10423,51477,3628,3632,51763,27124,9562,3707,3706,80271,3705,253430,64768,55586,4329,7167	PIK3C3,MTM1,MTMR1,MTMR2,MTMR3,MTMR4,MTMR8,MTMR6,MTMR7,MTMR14,PI4KA,PI4KB,PI4K2A,PI4K2B,SACM1L,INPP5F,PIP5K1C,PIP5K1A,PIP5K1B,PIP5KL1,OCRL,INPP5B,INPP5E,SYNJ1,SYNJ2,PIK3CA,PIK3CD,PIK3CB,PIK3CG,PTEN,INPP5D,INPPL1,PIK3C2G,PIK3C2A,PIK3C2B,INPP4A,INPP4B,PIKFYVE,FIG4,PIP4K2C,PIP4K2A,PIP4K2B,PLCB1,PLCB2,PLCB3,PLCB4,PLCD1,PLCD3,PLCD4,PLCE1,PLCG1,PLCG2,PLCZ1,PLCH1,PLCH2,IMPA2,IMPA1,CDIPT,ISYNA1,INPP1,INPP…
hsa00563	Glycosylphosphatidylinositol (GPI)-anchor biosynthesis - Homo sapiens (human)	5.27753e+121	PIGA,PIGC,PIGH,PIGP,PIGQ,PIGY,DPM2,PIGL,PIGW,GPLD1,PIGM,PIGX,PIGV,PIGN,PIGB,PIGO,PIGF,PIGG,GPAA1,PIGK,PIGS,PIGT,PIGU,PGAP1,MPPE1,PIGZ
hsa00564	Glycerophospholipid metabolism - Homo sapiens (human)	23171,2819,2820,57678,150763,137964,84803,10554,10555,56894,56895,55326,253558,154141,129642,8443,56985,8611,8613,8612,23175,64900,9663,84513,196051,8525,8527,9162,1606,8526,1607,160851,1608,1609,139189,56994,10390,5337,5338,23646,122618,3931,8399,26279,30814,50487,64600,81579,84647,5319,5322,5320,391013,123745,5321,8681,100137049,8605,283748,255189,8398,151056,11145,54947,79888,254531,10162,1043…	GPD1L,GPD1,GPD2,GPAM,GPAT2,GPAT4,GPAT3,AGPAT1,AGPAT2,AGPAT3,AGPAT4,AGPAT5,LCLAT1,MBOAT1,MBOAT2,GNPAT,ADPRM,PLPP1,PLPP3,PLPP2,LPIN1,LPIN3,LPIN2,PLPP5,PLPP4,DGKZ,DGKD,DGKI,DGKA,DGKE,DGKB,DGKH,DGKG,DGKQ,DGKK,CHPT1,CEPT1,PLD1,PLD2,PLD3,PLD4,LCAT,PLA2G10,PLA2G2D,PLA2G2E,PLA2G3,PLA2G2F,PLA2G12A,PLA2G12B,PLA2G1B,PLA2G5,PLA2G2A,PLA2G2C,PLA2G4E,PLA2G4A,JMJD7-PLA2G4B,PLA2G4B,PLA2G4C,PLA2G4D,PLA2G4F,PLA2G6,…
hsa00565	Ether lipid metabolism - Homo sapiens (human)	8540,8611,8613,8612,85465,56994,10390,387521,387522,8399,26279,30814,50487,64600,81579,84647,5319,5322,5320,391013,123745,5321,8681,100137049,8605,283748,255189,8398,151056,11145,254531,133121,5168,79153,284161,255043,5337,5338,23646,122618,7368,9514,54947,79888,5048,5049,5050,7941,5051	AGPS,PLPP1,PLPP3,PLPP2,SELENOI,CHPT1,CEPT1,PEDS1,PEDS1-UBE2V1,PLA2G10,PLA2G2D,PLA2G2E,PLA2G3,PLA2G2F,PLA2G12A,PLA2G12B,PLA2G1B,PLA2G5,PLA2G2A,PLA2G2C,PLA2G4E,PLA2G4A,JMJD7-PLA2G4B,PLA2G4B,PLA2G4C,PLA2G4D,PLA2G4F,PLA2G6,PLB1,PLAAT3,LPCAT4,ENPP6,ENPP2,GDPD3,GDPD1,TMEM86B,PLD1,PLD2,PLD3,PLD4,UGT8,GAL3ST1,LPCAT2,LPCAT1,PAFAH1B1,PAFAH1B2,PAFAH1B3,PLA2G7,PAFAH2
hsa00590	Arachidonic acid metabolism - Homo sapiens (human)	8399,26279,30814,50487,64600,81579,84647,5319,5322,5320,391013,123745,5321,8681,100137049,8605,283748,255189,8398,151056,11145,5742,5743,9536,80142,10728,873,874,127281,6916,5730,27306,8644,5740,240,4048,8529,4051,4056,2678,2687,257202,2882,2877,2878,2876,2880,493869,1571,1573,113612,1557,11283,239,242,247,1555,1558,1559,2053,246	PLA2G10,PLA2G2D,PLA2G2E,PLA2G3,PLA2G2F,PLA2G12A,PLA2G12B,PLA2G1B,PLA2G5,PLA2G2A,PLA2G2C,PLA2G4E,PLA2G4A,JMJD7-PLA2G4B,PLA2G4B,PLA2G4C,PLA2G4D,PLA2G4F,PLA2G6,PLB1,PLAAT3,PTGS1,PTGS2,PTGES,PTGES2,PTGES3,CBR1,CBR3,PRXL2B,TBXAS1,PTGDS,HPGDS,AKR1C3,PTGIS,ALOX5,LTA4H,CYP4F2,CYP4F3,LTC4S,GGT1,GGT5,GPX6,GPX7,GPX2,GPX3,GPX1,GPX5,GPX8,CYP2E1,CYP2J2,CYP2U1,CYP2C19,CYP4F8,ALOX12,ALOX12B,ALOX15B,CYP2B6,CYP2C8…
hsa00591	Linoleic acid metabolism - Homo sapiens (human)	8.39926e+136	PLA2G10,PLA2G2D,PLA2G2E,PLA2G3,PLA2G2F,PLA2G12A,PLA2G12B,PLA2G1B,PLA2G5,PLA2G2A,PLA2G2C,PLA2G4E,PLA2G4A,JMJD7-PLA2G4B,PLA2G4B,PLA2G4C,PLA2G4D,PLA2G4F,PLA2G6,PLB1,PLAAT3,ALOX15,CYP1A2,CYP2C8,CYP2C9,CYP2C19,CYP2J2,CYP2E1,CYP3A4
hsa00592	alpha-Linolenic acid metabolism - Homo sapiens (human)	8399,26279,30814,50487,64600,81579,84647,5319,5322,5320,391013,123745,5321,8681,100137049,8605,283748,255189,8398,151056,11145,9415,8310,51,30	PLA2G10,PLA2G2D,PLA2G2E,PLA2G3,PLA2G2F,PLA2G12A,PLA2G12B,PLA2G1B,PLA2G5,PLA2G2A,PLA2G2C,PLA2G4E,PLA2G4A,JMJD7-PLA2G4B,PLA2G4B,PLA2G4C,PLA2G4D,PLA2G4F,PLA2G6,PLB1,PLAAT3,FADS2,ACOX3,ACOX1,ACAA1
hsa00600	Sphingolipid metabolism - Homo sapiens (human)	10558,9517,55304,2531,10715,29956,79603,204219,253782,91012,427,56624,340485,125981,55331,8560,123099,259230,166929,6609,6610,55512,55627,339221,64781,8611,8613,8612,81537,130367,8877,56848,8879,7357,2629,57704,9331,2720,7368,2581,9514,410,4758,10825,129807,4759,2717,5660,768239	SPTLC1,SPTLC2,SPTLC3,KDSR,CERS1,CERS2,CERS4,CERS3,CERS6,CERS5,ASAH1,ASAH2,ACER2,ACER1,ACER3,DEGS1,DEGS2,SGMS1,SGMS2,SMPD1,SMPD2,SMPD3,SMPD4,ENPP7,CERK,PLPP1,PLPP3,PLPP2,SGPP1,SGPP2,SPHK1,SPHK2,SGPL1,UGCG,GBA,GBA2,B4GALT6,GLB1,UGT8,GALC,GAL3ST1,ARSA,NEU1,NEU3,NEU4,NEU2,GLA,PSAP,PSAPL1
hsa00601	Glycosphingolipid biosynthesis - lacto and neolacto series - Homo sapiens (human)	84002,8708,8707,10317,2523,2524,2525,6487,6484,28,2683,8704,8703,8702,10690,2526,2527,2528,2529,10402,6489,53947,8706,10678,10331,79369,2651	B3GNT5,B3GALT1,B3GALT2,B3GALT5,FUT1,FUT2,FUT3,ST3GAL3,ST3GAL4,ABO,B4GALT1,B4GALT2,B4GALT3,B4GALT4,FUT9,FUT4,FUT5,FUT6,FUT7,ST3GAL6,ST8SIA1,A4GALT,B3GALNT1,B3GNT2,B3GNT3,B3GNT4,GCNT2
hsa00603	Glycosphingolipid biosynthesis - globo and isoglobo series - Homo sapiens (human)	1.27551e+65	A3GALT2,B3GALNT1,GBGT1,A4GALT,GLA,B3GALT5,HEXA,HEXB,NAGA,FUT1,FUT2,ST3GAL1,ST3GAL2,ST8SIA1,FUT9
hsa00604	Glycosphingolipid biosynthesis - ganglio series - Homo sapiens (human)	2.58387e+65	B4GALNT1,B3GALT4,ST3GAL2,ST3GAL1,ST8SIA5,ST3GAL5,ST8SIA1,SLC33A1,ST6GALNAC3,ST6GALNAC4,ST6GALNAC5,ST6GALNAC6,GLB1,HEXA,HEXB
hsa00620	Pyruvate metabolism - Homo sapiens (human)	84532,55902,5161,5160,5162,1737,1738,124,125,126,131,127,130,128,10327,5315,5313,31,32,98,97,217,224,219,501,223,134526,160287,92483,3939,3945,3948,197257,2739,3029,9380,4200,10873,4199,5091,4190,4191,2271,5105,5106,39,38	ACSS1,ACSS2,PDHA2,PDHA1,PDHB,DLAT,DLD,ADH1A,ADH1B,ADH1C,ADH7,ADH4,ADH6,ADH5,AKR1A1,PKM,PKLR,ACACA,ACACB,ACYP2,ACYP1,ALDH2,ALDH3A2,ALDH1B1,ALDH7A1,ALDH9A1,ACOT12,LDHAL6A,LDHAL6B,LDHA,LDHB,LDHC,LDHD,GLO1,HAGH,GRHPR,ME2,ME3,ME1,PC,MDH1,MDH2,FH,PCK1,PCK2,ACAT2,ACAT1
hsa00630	Glyoxylate and dicarboxylate metabolism - Homo sapiens (human)	84532,55902,4190,4191,1431,50,48,39,38,84693,5095,5096,4594,51179,54363,847,9380,283871,189,2752,6472,6470,2731,275,1738,2653,81888,132158,112817,125061	ACSS1,ACSS2,MDH1,MDH2,CS,ACO2,ACO1,ACAT2,ACAT1,MCEE,PCCA,PCCB,MMUT,HAO2,HAO1,CAT,GRHPR,PGP,AGXT,GLUL,SHMT2,SHMT1,GLDC,AMT,DLD,GCSH,HYI,GLYCTK,HOGA1,AFMID
hsa00640	Propanoate metabolism - Homo sapiens (human)	84532,55902,79611,593,594,1629,1738,35,8310,51,3030,1962,1892,26275,31,32,23417,18,5095,5096,55862,84693,4594,8802,8801,8803,4329,160287,92483,3939,3945,3948	ACSS1,ACSS2,ACSS3,BCKDHA,BCKDHB,DBT,DLD,ACADS,ACOX3,ACOX1,HADHA,EHHADH,ECHS1,HIBCH,ACACA,ACACB,MLYCD,ABAT,PCCA,PCCB,ECHDC1,MCEE,MMUT,SUCLG1,SUCLG2,SUCLA2,ALDH6A1,LDHAL6A,LDHAL6B,LDHA,LDHB,LDHC
hsa00650	Butanoate metabolism - Homo sapiens (human)	39,38,3033,3030,1962,1892,35,116285,123876,341392,54988,6296,348158,142827,79944,2571,2572,18,7915,3157,3158,3155,54511,5019,64064,65985,622,56898	ACAT2,ACAT1,HADH,HADHA,EHHADH,ECHS1,ACADS,ACSM1,ACSM2A,ACSM4,ACSM5,ACSM3,ACSM2B,ACSM6,L2HGDH,GAD1,GAD2,ABAT,ALDH5A1,HMGCS1,HMGCS2,HMGCL,HMGCLL1,OXCT1,OXCT2,AACS,BDH1,BDH2
hsa00670	One carbon pool by folate - Homo sapiens (human)	1.7192e+95	DHFR,DHFR2,MTHFD1L,MTHFD1,MTHFD2,MTHFD2L,SHMT2,SHMT1,GART,ATIC,FTCD,MTFMT,AMT,MTR,TYMS,ALDH1L1,ALDH1L2,MTHFR,MTHFS,ST20-MTHFS
hsa00730	Thiamine metabolism - Homo sapiens (human)	9054,84284,249,248,250,251,52,27010,122481,205,26289,204,203,158067,79178	NFS1,NTPCR,ALPL,ALPI,ALPP,ALPG,ACP1,TPK1,AK7,AK4,AK5,AK2,AK1,AK8,THTPA
hsa00740	Riboflavin metabolism - Homo sapiens (human)	55312,54,52,53,80308,5167,5169,645	RFK,ACP5,ACP1,ACP2,FLAD1,ENPP1,ENPP3,BLVRB
hsa00750	Vitamin B6 metabolism - Homo sapiens (human)	5.51639e+27	PNPO,PDXK,PDXP,PHOSPHO2,AOX1,PSAT1
hsa00760	Nicotinate and nicotinamide metabolism - Homo sapiens (human)	5.54235e+170	ASPDH,QPRT,NAPRT,PNP,NMRK1,NMRK2,NT5C2,NT5C1A,NT5C1B,NT5C,NT5M,NT5C1B-RDH14,NT5E,NMNAT3,NMNAT1,NMNAT2,ENPP1,ENPP3,NUDT12,NADSYN1,NAMPT,CD38,BST1,SIRT1,SIRT2,SIRT3,SIRT4,SIRT5,SIRT6,SIRT7,NADK,NADK2,NNT,NNMT,AOX1
hsa00770	Pantothenate and CoA biosynthesis - Homo sapiens (human)	5.33548e+89	PANK1,PANK3,PANK2,PPCS,PPCDC,ENPP1,ENPP3,COASY,AASDHPPT,VNN1,VNN2,BCAT2,BCAT1,DPYD,DPYS,UPB1,GADL1,CSAD,ALDH2,ALDH3A2,ALDH1B1
hsa00780	Biotin metabolism - Homo sapiens (human)	549953141686	OXSM,HLCS,BTD
hsa00785	Lipoic acid metabolism - Homo sapiens (human)	3.87787e+21	LIPT2,LIAS,LIPT1,ACSM1
hsa00790	Folate biosynthesis - Homo sapiens (human)	2.64325e+105	GCH1,ALPL,ALPI,ALPP,ALPG,DHFR,DHFR2,FPGS,GGH,PTS,SPR,AKR1B1,AKR1B10,CBR1,AKR1C3,QDPR,PCBD2,PCBD1,PAH,TH,TPH2,TPH1,MOCS1,MOCS2,GPHN,MOCOS
hsa00830	Retinol metabolism - Homo sapiens (human)	53630,124,125,126,131,127,128,130,9249,10901,317749,10170,50700,157506,51109,145226,112724,8608,195814,8630,9227,8694,158835,8228,6121,5959,316,8854,216,220,1592,56603,340665,1543,1544,1548,1549,1555,1558,1559,1562,29785,1576,1577,1551,100861540,54905,10941,79799,7367,10720,54490,54578,54657,54658,54659,7365,54600,7364,54575,54576,54579,7366,54577,7363,574537,54884,339761	BCO1,ADH1A,ADH1B,ADH1C,ADH7,ADH4,ADH5,ADH6,DHRS3,DHRS4,DHRS4L2,DHRS9,RDH8,RDH10,RDH11,RDH12,RDH13,RDH16,SDR16C5,HSD17B6,LRAT,DGAT1,AWAT2,PNPLA4,RPE65,RDH5,AOX1,ALDH1A2,ALDH1A1,ALDH1A3,CYP26A1,CYP26B1,CYP26C1,CYP1A1,CYP1A2,CYP2A6,CYP2A7,CYP2B6,CYP2C8,CYP2C9,CYP2C18,CYP2S1,CYP3A4,CYP3A5,CYP3A7,CYP3A7-CYP3A51P,CYP2W1,UGT2A1,UGT2A3,UGT2B17,UGT2B11,UGT2B28,UGT1A6,UGT1A4,UGT1A1,UGT1A3,UGT2B10,UGT1A9,UG…
hsa00860	Porphyrin and chlorophyll metabolism - Homo sapiens (human)	2.11212e+187	ALAS1,ALAS2,EARS2,EPRS1,ALAD,HMBS,UROS,UROD,CPOX,PPOX,FECH,COX10,COX15,MMAB,HMOX1,HMOX2,BLVRA,BLVRB,UGT2A1,UGT2A3,UGT2B17,UGT2B11,UGT2B28,UGT1A6,UGT1A4,UGT1A1,UGT1A3,UGT2B10,UGT1A9,UGT2B7,UGT1A10,UGT1A8,UGT1A5,UGT2B15,UGT1A7,UGT2B4,UGT2A2,GUSB,HCCS,CP,HEPH,HEPHL1,FXN
hsa00900	Terpenoid backbone biosynthesis - Homo sapiens (human)	39,38,3157,3158,3156,4598,10654,4597,3422,91734,2224,9453,23590,57107,79947,116150,2339,2342,9986,10269,23463,51449	ACAT2,ACAT1,HMGCS1,HMGCS2,HMGCR,MVK,PMVK,MVD,IDI1,IDI2,FDPS,GGPS1,PDSS1,PDSS2,DHDDS,NUS1,FNTA,FNTB,RCE1,ZMPSTE24,ICMT,PCYOX1
hsa00910	Nitrogen metabolism - Homo sapiens (human)	2.74727e+61	GLUD2,GLUD1,GLUL,CPS1,CA13,CA1,CA6,CA7,CA12,CA5B,CA14,CA9,CA3,CA5A,CA8,CA2,CA4
hsa00920	Sulfur metabolism - Homo sapiens (human)	9.06091e+43	PAPSS2,PAPSS1,BPNT1,BPNT2,SUOX,SQOR,ETHE1,MPST,TST,SELENBP1
hsa00970	Aminoacyl-tRNA biosynthesis - Homo sapiens (human)	4553,4573,4570,4555,4511,4572,4556,4563,4564,4565,4568,4567,4566,4569,4558,4571,4575,4574,4576,4578,4579,4577,124454,2058,55278,5188,283459,5859,57505,16,1615,55157,79731,4677,2617,80222,6897,123283,54938,6301,118672,51091,833,79587,4141,92935,123263,57176,7407,51520,23395,3376,55699,3735,57038,5917,25973,3035,23438,2193,10667,10056,8565,51067,10352,7453	TRNA,TRNR,TRNN,TRND,TRNC,TRNQ,TRNE,TRNG,TRNH,TRNI,TRNL2,TRNL1,TRNK,TRNM,TRNF,TRNP,TRNS2,TRNS1,TRNT,TRNW,TRNY,TRNV,EARS2,EPRS1,QRSL1,GATB,GATC,QARS1,AARS2,AARS1,DARS1,DARS2,NARS2,NARS1,GARS1,TARS2,TARS1,TARS3,SARS2,SARS1,PSTK,SEPSECS,CARS1,CARS2,MARS1,MARS2,MTFMT,VARS2,VARS1,LARS1,LARS2,IARS1,IARS2,KARS1,RARS2,RARS1,PARS2,HARS1,HARS2,FARSA,FARS2,FARSB,YARS1,YARS2,WARS2,WARS1
hsa00980	Metabolism of xenobiotics by cytochrome P450 - Homo sapiens (human)	1543,1559,1576,1545,221357,2939,2941,119391,2948,2953,2952,2947,4257,4259,2944,2949,4258,2938,2946,2940,9446,653689,2950,373156,27306,2052,1555,6822,1544,1548,1549,1571,1572,29785,1645,27294,1553,1565,107987478,1564,107987479,3290,374875,873,874,10941,79799,7367,10720,54490,54578,54657,54658,54659,7365,54600,7364,54575,54576,54579,7366,54577,7363,574537,1577,8574,22977,246181,221,222,218,124,125,…	CYP1A1,CYP2C9,CYP3A4,CYP1B1,GSTA5,GSTA2,GSTA4,GSTO2,GSTM4,GSTT2,GSTT1,GSTM3,MGST1,MGST3,GSTM1,GSTM5,MGST2,GSTA1,GSTM2,GSTA3,GSTO1,GSTT2B,GSTP1,GSTK1,HPGDS,EPHX1,CYP2B6,SULT2A1,CYP1A2,CYP2A6,CYP2A7,CYP2E1,CYP2F1,CYP2S1,AKR1C1,DHDH,CYP2A13,CYP2D6,cytochrome P450 2D6-like [KO:K17712] [EC:1.14.14.1],CYP2D7,CYP2D6,HSD11B1,HSD11B1L,CBR1,CBR3,UGT2A1,UGT2A3,UGT2B17,UGT2B11,UGT2B28,UGT1A6,UGT1A4,UGT1A1,UG…
hsa00982	Drug metabolism - cytochrome P450 - Homo sapiens (human)	1565,107987478,1564,107987479,1559,1576,2326,2327,2330,2328,2329,1557,1555,1577,221357,2939,2941,119391,2948,2953,2952,2947,4257,4259,2944,2949,4258,2938,2946,2940,9446,653689,2950,373156,27306,124,125,126,131,127,128,130,221,222,218,4129,4128,316,10941,79799,7367,10720,54490,54578,54657,54658,54659,7365,54600,7364,54575,54576,54579,7366,54577,7363,574537,1544,1571,1558,1548,1549	CYP2D6,cytochrome P450 2D6-like [KO:K17712] [EC:1.14.14.1],CYP2D7,CYP2D6,CYP2C9,CYP3A4,FMO1,FMO2,FMO5,FMO3,FMO4,CYP2C19,CYP2B6,CYP3A5,GSTA5,GSTA2,GSTA4,GSTO2,GSTM4,GSTT2,GSTT1,GSTM3,MGST1,MGST3,GSTM1,GSTM5,MGST2,GSTA1,GSTM2,GSTA3,GSTO1,GSTT2B,GSTP1,GSTK1,HPGDS,ADH1A,ADH1B,ADH1C,ADH7,ADH4,ADH5,ADH6,ALDH3B1,ALDH3B2,ALDH3A1,MAOB,MAOA,AOX1,UGT2A1,UGT2A3,UGT2B17,UGT2B11,UGT2B28,UGT1A6,UGT1A4,UGT1A1,UG…
hsa00983	Drug metabolism - other enzymes - Homo sapiens (human)	3251,3614,3615,8833,7172,7498,3704,1066,8824,10941,79799,7367,10720,54490,54578,54657,54658,54659,7365,54600,7364,54575,54576,54579,7366,54577,7363,574537,2990,1576,978,1890,1806,1807,51733,1548,1549,151531,7378,83549,7371,54963,7084,7083,7372,51727,6240,50484,6241,10201,29922,4831,4833,4830,4832,654364,1854,4353,10,9,1571,221357,2939,2941,119391,2948,2953,2952,2947,4257,4259,2944,2949,4258,2938,…	HPRT1,IMPDH1,IMPDH2,GMPS,TPMT,XDH,ITPA,CES1,CES2,UGT2A1,UGT2A3,UGT2B17,UGT2B11,UGT2B28,UGT1A6,UGT1A4,UGT1A1,UGT1A3,UGT2B10,UGT1A9,UGT2B7,UGT1A10,UGT1A8,UGT1A5,UGT2B15,UGT1A7,UGT2B4,UGT2A2,GUSB,CYP3A4,CDA,TYMP,DPYD,DPYS,UPB1,CYP2A6,CYP2A7,UPP2,UPP1,UCK1,UCK2,UCKL1,TK2,TK1,UMPS,CMPK1,RRM1,RRM2B,RRM2,NME6,NME7,NME2,NME4,NME1,NME3,NME1-NME2,DUT,MPO,NAT2,NAT1,CYP2E1,GSTA5,GSTA2,GSTA4,GSTO2,GSTM4,GSTT2…
hsa01040	Biosynthesis of unsaturated fatty acids - Homo sapiens (human)	64834,54898,83401,6785,60481,79071,79993,51144,201562,9200,401494,51495,9524,6319,79966,9415,3992,8310,51,3295,30,6342,122970,10965,641371,11332,570	ELOVL1,ELOVL2,ELOVL3,ELOVL4,ELOVL5,ELOVL6,ELOVL7,HSD17B12,HACD2,HACD1,HACD4,HACD3,TECR,SCD,SCD5,FADS2,FADS1,ACOX3,ACOX1,HSD17B4,ACAA1,SCP2,ACOT4,ACOT2,ACOT1,ACOT7,BAAT

## Sheet: Functional enrichment analysis
Category	Term	Description	LogP	Log(q-value)	InTerm_InList	Genes	Symbols
GO Biological Processes	GO:1901137	carbohydrate derivative biosynthetic process	-5.92501	-1.57659	6/590	957,2762,8534,9245,11320,116150,2998	ENTPD5,GMDS,CHST1,GCNT3,MGAT4A,NUS1,GYS2
GO Biological Processes	GO:1901137	carbohydrate derivative biosynthetic process	-5.92501	-1.57659	6/590	957,2762,8534,9245,11320,116150	ENTPD5,GMDS,CHST1,GCNT3,MGAT4A,NUS1
GO Biological Processes	GO:0006486	protein glycosylation	-5.01789	-1.30542	4/219	957,9245,11320,116150	ENTPD5,GCNT3,MGAT4A,NUS1
GO Biological Processes	GO:0043413	macromolecule glycosylation	-5.01789	-1.30542	4/219	957,9245,11320,116150	ENTPD5,GCNT3,MGAT4A,NUS1
GO Biological Processes	GO:0006487	protein N-linked glycosylation	-4.91111	-1.30542	3/72	957,11320,116150	ENTPD5,MGAT4A,NUS1
GO Biological Processes	GO:0070085	glycosylation	-4.87569	-1.30542	4/238	957,9245,11320,116150	ENTPD5,GCNT3,MGAT4A,NUS1
GO Biological Processes	GO:0009101	glycoprotein biosynthetic process	-4.62342	-1.14759	4/276	957,9245,11320,116150	ENTPD5,GCNT3,MGAT4A,NUS1
GO Biological Processes	GO:0009100	glycoprotein metabolic process	-4.23609	-0.841914	4/347	957,9245,11320,116150	ENTPD5,GCNT3,MGAT4A,NUS1
GO Biological Processes	GO:0034645	cellular macromolecule biosynthetic process	-4.0356	-0.687177	5/770	957,2998,9245,11320,116150	ENTPD5,GYS2,GCNT3,MGAT4A,NUS1
Reactome Gene Sets	R-HSA-446203	Asparagine N-linked glycosylation	-3.06054	0	3/304	2762,11320,116150	GMDS,MGAT4A,NUS1
Reactome Gene Sets	R-HSA-71291	Metabolism of amino acids and derivatives	-5.53125	-1.48386	5/376	443,5860,6611,6723,6821,5096	ASPA,QDPR,SMS,SRM,SUOX,PCCB
Reactome Gene Sets	R-HSA-71291	Metabolism of amino acids and derivatives	-5.53125	-1.48386	5/376	443,5860,6611,6723,6821	ASPA,QDPR,SMS,SRM,SUOX
GO Biological Processes	GO:0006520	amino acid metabolic process	-4.59293	-1.14759	4/281	443,5096,5860,6611	ASPA,PCCB,QDPR,SMS
GO Biological Processes	GO:1901605	alpha-amino acid metabolic process	-3.60317	-0.29614	3/198	443,5860,6611	ASPA,QDPR,SMS
GO Biological Processes	GO:0046395	carboxylic acid catabolic process	-3.44614	-0.189191	3/224	443,5096,5860	ASPA,PCCB,QDPR
GO Biological Processes	GO:0016054	organic acid catabolic process	-3.42367	-0.189191	3/228	443,5096,5860	ASPA,PCCB,QDPR
GO Biological Processes	GO:0044282	small molecule catabolic process	-2.84236	0	3/362	443,5096,5860	ASPA,PCCB,QDPR
GO Biological Processes	GO:0008610	lipid biosynthetic process	-3.3503	-0.148002	4/591	8897,51196,79603,116150	MTMR3,PLCE1,CERS4,NUS1
Reactome Gene Sets	R-HSA-5668914	Diseases of metabolism	-3.31202	-0.139686	3/249	2998,5096,116150	GYS2,PCCB,NUS1
GO Biological Processes	GO:0006790	sulfur compound metabolic process	-2.89506	0	3/347	6611,6821,8534	SMS,SUOX,CHST1
GO Biological Processes	GO:0005975	carbohydrate metabolic process	-2.52785	0	3/467	2998,8534,9245	GYS2,CHST1,GCNT3
GO Biological Processes	GO:0032787	monocarboxylic acid metabolic process	-2.44929	0	3/498	5096,11320,81889	PCCB,MGAT4A,FAHD1

## Sheet: Disease target prediction
_MEMBER_MyList	_LogP_MyList	GO	_PATTERN_	_RANK_	GiniIndex	Category	CategoryID	Description	PARENT_GO	LogP	Enrichment	Z-score	#TotalGeneInLibrary	#GeneInGO	#GeneInHitList	#GeneInGOAndHitList	%InGO	STDV %InGO	GeneID	Hits	Log(q-value)	EvidenceCutoff
1	-6.1	C1836996	M1	1	0	DisGeNET	35	Disproportionate tall stature		-6.1	160	22	30182	30	19	3	16	8.4	529|6611|7468	ATP6V1E1|SMS|NSD2	-1.6	0
1	-5	C1837108	M1	1	0	DisGeNET	35	Decreased muscle mass		-5	73	15	30182	65	19	3	16	8.4	529|6611|7468	ATP6V1E1|SMS|NSD2	-0.93	0
1	-5	C0151611	M1	1	0	DisGeNET	35	Electroencephalogram abnormal		-5	28	10	30182	227	19	4	21	9.4	443|6611|7468|116150	ASPA|SMS|NSD2|NUS1	-0.93	0
1	-4.3	C1860834	M1	1	0	DisGeNET	35	Infantile muscular hypotonia		-4.3	40	11	30182	118	19	3	16	8.4	529|6611|6821	ATP6V1E1|SMS|SUOX	-0.36	0
1	-3.9	C0023380	M1	1	0	DisGeNET	35	Lethargy		-3.9	30	9.2	30182	160	19	3	16	8.4	443|2998|5096	ASPA|GYS2|PCCB	-0.068	0
1	-3.5	C0040822	M1	1	0	DisGeNET	35	Tremor		-3.5	12	6.4	30182	528	19	4	21	9.4	443|5860|6611|116150	ASPA|QDPR|SMS|NUS1	0	0
1	-3.2	C0027066	M1	1	0	DisGeNET	35	Myoclonus		-3.2	18	7	30182	265	19	3	16	8.4	5860|6611|116150	QDPR|SMS|NUS1	0	0
1	-3.1	C0009081	M1	1	0	DisGeNET	35	Congenital clubfoot		-3.1	17	6.7	30182	285	19	3	16	8.4	529|6611|7468	ATP6V1E1|SMS|NSD2	0	0
1	-2.9	C1963184	M1	1	0	DisGeNET	35	Nystagmus, CTCAE 3.0		-2.9	8.2	5.1	30182	779	19	4	21	9.4	443|529|7468|116150	ASPA|ATP6V1E1|NSD2|NUS1	0	0
1	-2.9	C4554036	M1	1	0	DisGeNET	35	Nystagmus, CTCAE 5.0		-2.9	8.2	5.1	30182	779	19	4	21	9.4	443|529|7468|116150	ASPA|ATP6V1E1|NSD2|NUS1	0	0
1	-2.8	C0018817	M1	1	0	DisGeNET	35	Atrial Septal Defects		-2.8	12	5.6	30182	384	19	3	16	8.4	529|6611|7468	ATP6V1E1|SMS|NSD2	0	0
1	-2.7	C0423110	M1	1	0	DisGeNET	35	Downward slant of palpebral fissure		-2.7	12	5.6	30182	391	19	3	16	8.4	529|7468|116150	ATP6V1E1|NSD2|NUS1	0	0
1	-2.6	C0017168	M1	1	0	DisGeNET	35	Gastroesophageal reflux disease		-2.6	11	5.2	30182	446	19	3	16	8.4	443|7468|116150	ASPA|NSD2|NUS1	0	0
1	-2.6	C0013421	M1	1	0	DisGeNET	35	Dystonia		-2.6	11	5.1	30182	453	19	3	16	8.4	5096|5860|6821	PCCB|QDPR|SUOX	0	0
1	-2.6	C0235946	M1	1	0	DisGeNET	35	Cerebral atrophy		-2.6	10	5.1	30182	454	19	3	16	8.4	443|5096|116150	ASPA|PCCB|NUS1	0	0
1	-2.5	C4553743	M1	1	0	DisGeNET	35	Spasticity, CTCAE		-2.5	10	5	30182	477	19	3	16	8.4	443|529|116150	ASPA|ATP6V1E1|NUS1	0	0
1	-2.4	C0038220	M1	1	0	DisGeNET	35	Status Epilepticus		-2.4	8.9	4.6	30182	533	19	3	16	8.4	5860|6611|116150	QDPR|SMS|NUS1	0	0
1	-2.3	C0454644	M1	1	0	DisGeNET	35	Delayed speech and language development		-2.3	8.5	4.5	30182	560	19	3	16	8.4	443|529|116150	ASPA|ATP6V1E1|NUS1	0	0
1	-2.3	C0029124	M1	1	0	DisGeNET	35	Optic Atrophy		-2.3	8.4	4.5	30182	568	19	3	16	8.4	443|7468|116150	ASPA|NSD2|NUS1	0	0
1	-2.3	C0026838	M1	1	0	DisGeNET	35	Muscle Spasticity		-2.3	8.2	4.4	30182	580	19	3	16	8.4	443|529|116150	ASPA|ATP6V1E1|NUS1	0	0
1	-2.3	C0424605	M1	1	0	DisGeNET	35	Developmental delay (disorder)		-2.3	8.2	4.4	30182	584	19	3	16	8.4	2762|6611|7468	GMDS|SMS|NSD2	0	0
1	-2.2	C0020534	M1	1	0	DisGeNET	35	Orbital separation excessive		-2.2	8.1	4.4	30182	590	19	3	16	8.4	529|6611|7468	ATP6V1E1|SMS|NSD2	0	0
1	-2.2	C0008925	M1	1	0	DisGeNET	35	Cleft Palate		-2.2	7.8	4.3	30182	611	19	3	16	8.4	6611|7468|8897	SMS|NSD2|MTMR3	0	0
1	-2	C0038013	M1	1	0	DisGeNET	35	Ankylosing spondylitis		-2	6.7	3.9	30182	710	19	3	16	8.4	443|6611|6821	ASPA|SMS|SUOX	0	0

## Sheet: Drug prediction
# Input	ChemicalName	ChemicalID	CasRN	GeneSymbol	GeneID	Organism	OrganismID	Interaction	InteractionActions	PubMedIDs
pccb	4-(4-((5-(4,5-dimethyl-2-nitrophenyl)-2-furanyl)methylene)-4,5-dihydro-3-methyl-5-oxo-1H-pyrazol-1-yl)benzoic acid	C584509		PCCB	5096	Homo sapiens	9606	4-(4-((5-(4,5-dimethyl-2-nitrophenyl)-2-furanyl)methylene)-4,5-dihydro-3-methyl-5-oxo-1H-pyrazol-1-yl)benzoic acid results in increased expression of PCCB mRNA	increases^expression	26191083
pccb	Acetaminophen	D000082	103-90-2	PCCB	5096	Homo sapiens	9606	Acetaminophen results in decreased expression of PCCB mRNA	decreases^expression	25704631|29067470
pccb	Acrolein	D000171	107-02-8	PCCB	5096	Homo sapiens	9606	[Acrolein co-treated with methacrylaldehyde co-treated with alpha-pinene co-treated with Ozone] results in increased oxidation of PCCB mRNA	affects^cotreatment|increases^oxidation	32699268
pccb	Acrolein	D000171	107-02-8	PCCB	5096	Homo sapiens	9606	[Air Pollutants results in increased abundance of [Acrolein co-treated with methacrylaldehyde co-treated with alpha-pinene co-treated with Ozone]] which results in increased oxidation of PCCB mRNA	affects^cotreatment|increases^abundance|increases^oxidation	32699268
pccb	Acrylamide	D020106	1979-06-01	PCCB	5096	Homo sapiens	9606	Acrylamide results in decreased expression of PCCB mRNA	decreases^expression	32763439
pccb	Aflatoxin B1	D016604	1162-65-8	PCCB	5096	Homo sapiens	9606	Aflatoxin B1 affects the expression of PCCB protein	affects^expression	20106945
pccb	Air Pollutants	D000393		PCCB	5096	Homo sapiens	9606	[Air Pollutants results in increased abundance of [Acrolein co-treated with methacrylaldehyde co-treated with alpha-pinene co-treated with Ozone]] which results in increased oxidation of PCCB mRNA	affects^cotreatment|increases^abundance|increases^oxidation	32699268
pccb	alpha-pinene	C005451	80-56-8	PCCB	5096	Homo sapiens	9606	[Acrolein co-treated with methacrylaldehyde co-treated with alpha-pinene co-treated with Ozone] results in increased oxidation of PCCB mRNA	affects^cotreatment|increases^oxidation	32699268
pccb	alpha-pinene	C005451	80-56-8	PCCB	5096	Homo sapiens	9606	[Air Pollutants results in increased abundance of [Acrolein co-treated with methacrylaldehyde co-treated with alpha-pinene co-treated with Ozone]] which results in increased oxidation of PCCB mRNA	affects^cotreatment|increases^abundance|increases^oxidation	32699268
pccb	aristolochic acid I	C000228	313-67-7	PCCB	5096	Homo sapiens	9606	aristolochic acid I results in decreased expression of PCCB mRNA	decreases^expression	33212167
pccb	arsenite	C015001	15502-74-6	PCCB	5096	Homo sapiens	9606	arsenite promotes the reaction [G3BP1 protein binds to PCCB protein]	affects^binding|increases^reaction	32406909
pccb	Atrazine	D001280	1912-24-9	PCCB	5096	Homo sapiens	9606	Atrazine results in increased expression of PCCB mRNA	increases^expression	22378314
pccb	Benzo(a)pyrene	D001564	50-32-8	PCCB	5096	Homo sapiens	9606	Benzo(a)pyrene results in decreased expression of PCCB mRNA	decreases^expression	32234424
pccb	Benzo(a)pyrene	D001564	50-32-8	PCCB	5096	Homo sapiens	9606	Benzo(a)pyrene results in decreased methylation of PCCB promoter	decreases^methylation	27901495
pccb	Cadmium	D002104	7440-43-9	PCCB	5096	Homo sapiens	9606	[Cadmium Chloride results in increased abundance of Cadmium] which results in increased expression of PCCB mRNA	increases^abundance|increases^expression	35301059
pccb	Cadmium	D002104	7440-43-9	PCCB	5096	Homo sapiens	9606	Cadmium results in decreased expression of PCCB mRNA	decreases^expression	23369406
pccb	Cadmium Chloride	D019256	10108-64-2	PCCB	5096	Homo sapiens	9606	[Cadmium Chloride results in increased abundance of Cadmium] which results in increased expression of PCCB mRNA	increases^abundance|increases^expression	35301059
pccb	CGP 52608	C092451	87958-67-6	PCCB	5096	Homo sapiens	9606	CGP 52608 promotes the reaction [RORA protein binds to PCCB gene]	affects^binding|increases^reaction	28238834
pccb	Copper Sulfate	D019327	7758-98-7	PCCB	5096	Homo sapiens	9606	Copper Sulfate results in decreased expression of PCCB mRNA	decreases^expression	19549813
pccb	Cyclosporine	D016572	59865-13-3	PCCB	5096	Homo sapiens	9606	Cyclosporine results in decreased expression of PCCB mRNA	decreases^expression	20106945
pccb	Doxorubicin	D004317	23214-92-8	PCCB	5096	Homo sapiens	9606	Doxorubicin results in decreased expression of PCCB mRNA	decreases^expression	29803840
pccb	Estradiol	D004958	50-28-2	PCCB	5096	Homo sapiens	9606	[Estradiol co-treated with TGFB1 protein] results in decreased expression of PCCB mRNA	affects^cotreatment|decreases^expression	30165855
pccb	Gasoline	D005742		PCCB	5096	Homo sapiens	9606	[[Gasoline co-treated with isobutyl alcohol] results in increased abundance of [Particulate Matter co-treated with Polycyclic Aromatic Hydrocarbons]] which results in decreased expression of PCCB mRNA	affects^cotreatment|decreases^expression|increases^abundance	29432896
pccb	Hydralazine	D006830	86-54-4	PCCB	5096	Homo sapiens	9606	[Hydralazine co-treated with Valproic Acid] results in increased expression of PCCB mRNA	affects^cotreatment|increases^expression	17183730
pccb	isobutyl alcohol	C040507	78-83-1	PCCB	5096	Homo sapiens	9606	[[Gasoline co-treated with isobutyl alcohol] results in increased abundance of [Particulate Matter co-treated with Polycyclic Aromatic Hydrocarbons]] which results in decreased expression of PCCB mRNA	affects^cotreatment|decreases^expression|increases^abundance	29432896
pccb	Isotretinoin	D015474	4759-48-2	PCCB	5096	Homo sapiens	9606	Isotretinoin results in decreased expression of PCCB mRNA	decreases^expression	20436886
pccb	methacrylaldehyde	C039175	78-85-3	PCCB	5096	Homo sapiens	9606	[Acrolein co-treated with methacrylaldehyde co-treated with alpha-pinene co-treated with Ozone] results in increased oxidation of PCCB mRNA	affects^cotreatment|increases^oxidation	32699268
pccb	methacrylaldehyde	C039175	78-85-3	PCCB	5096	Homo sapiens	9606	[Air Pollutants results in increased abundance of [Acrolein co-treated with methacrylaldehyde co-treated with alpha-pinene co-treated with Ozone]] which results in increased oxidation of PCCB mRNA	affects^cotreatment|increases^abundance|increases^oxidation	32699268
pccb	Methyl Methanesulfonate	D008741	66-27-3	PCCB	5096	Homo sapiens	9606	Methyl Methanesulfonate results in decreased expression of PCCB mRNA	decreases^expression	23649840
pccb	Ozone	D010126	10028-15-6	PCCB	5096	Homo sapiens	9606	[Acrolein co-treated with methacrylaldehyde co-treated with alpha-pinene co-treated with Ozone] results in increased oxidation of PCCB mRNA	affects^cotreatment|increases^oxidation	32699268
pccb	Ozone	D010126	10028-15-6	PCCB	5096	Homo sapiens	9606	[Air Pollutants results in increased abundance of [Acrolein co-treated with methacrylaldehyde co-treated with alpha-pinene co-treated with Ozone]] which results in increased oxidation of PCCB mRNA	affects^cotreatment|increases^abundance|increases^oxidation	32699268
pccb	Ozone	D010126	10028-15-6	PCCB	5096	Homo sapiens	9606	[Volatile Organic Compounds co-treated with Ozone] results in increased oxidation of PCCB mRNA	affects^cotreatment|increases^oxidation	32699268
pccb	Particulate Matter	D052638		PCCB	5096	Homo sapiens	9606	[[Gasoline co-treated with isobutyl alcohol] results in increased abundance of [Particulate Matter co-treated with Polycyclic Aromatic Hydrocarbons]] which results in decreased expression of PCCB mRNA	affects^cotreatment|decreases^expression|increases^abundance	29432896
pccb	perfluorooctanoic acid	C023036	335-67-1	PCCB	5096	Homo sapiens	9606	perfluorooctanoic acid results in increased expression of PCCB protein	increases^expression	26879310
pccb	Polycyclic Aromatic Hydrocarbons	D011084		PCCB	5096	Homo sapiens	9606	[[Gasoline co-treated with isobutyl alcohol] results in increased abundance of [Particulate Matter co-treated with Polycyclic Aromatic Hydrocarbons]] which results in decreased expression of PCCB mRNA	affects^cotreatment|decreases^expression|increases^abundance	29432896
pccb	poly(propyleneimine)	C443641		PCCB	5096	Homo sapiens	9606	poly(propyleneimine) analog results in decreased expression of PCCB mRNA	decreases^expression	16308212
pccb	sodium arsenite	C017947	13768-07-5	PCCB	5096	Homo sapiens	9606	sodium arsenite affects the methylation of PCCB gene	affects^methylation	28589171
pccb	Temozolomide	D000077204	85622-93-1	PCCB	5096	Homo sapiens	9606	Temozolomide results in increased expression of PCCB mRNA	increases^expression	31758290
pccb	Thapsigargin	D019284	67526-95-8	PCCB	5096	Homo sapiens	9606	Thapsigargin results in decreased expression of PCCB mRNA	decreases^expression	22378314
pccb	Tretinoin	D014212	302-79-4	PCCB	5096	Homo sapiens	9606	Tretinoin results in decreased expression of PCCB mRNA	decreases^expression	33167477
pccb	Tunicamycin	D014415	11089-65-9	PCCB	5096	Homo sapiens	9606	Tunicamycin results in decreased expression of PCCB mRNA	decreases^expression	22378314
pccb	Urethane	D014520	51-79-6	PCCB	5096	Homo sapiens	9606	Urethane results in decreased expression of PCCB mRNA	decreases^expression	28818685
pccb	Valproic Acid	D014635	99-66-1	PCCB	5096	Homo sapiens	9606	[Hydralazine co-treated with Valproic Acid] results in increased expression of PCCB mRNA	affects^cotreatment|increases^expression	17183730
pccb	Valproic Acid	D014635	99-66-1	PCCB	5096	Homo sapiens	9606	Valproic Acid results in decreased methylation of PCCB gene	decreases^methylation	29154799
pccb	Volatile Organic Compounds	D055549		PCCB	5096	Homo sapiens	9606	[Volatile Organic Compounds co-treated with Ozone] results in increased oxidation of PCCB mRNA	affects^cotreatment|increases^oxidation	32699268
gcnt3	3,19-(2-bromobenzylidene)andrographolide	C000598422		GCNT3	9245	Homo sapiens	9606	[3,19-(2-bromobenzylidene)andrographolide results in decreased susceptibility to 3,19-(2-bromobenzylidene)andrographolide] which results in increased expression of GCNT3 mRNA	decreases^response to substance|increases^expression	34087331
gcnt3	4-(4-((5-(4,5-dimethyl-2-nitrophenyl)-2-furanyl)methylene)-4,5-dihydro-3-methyl-5-oxo-1H-pyrazol-1-yl)benzoic acid	C584509		GCNT3	9245	Homo sapiens	9606	4-(4-((5-(4,5-dimethyl-2-nitrophenyl)-2-furanyl)methylene)-4,5-dihydro-3-methyl-5-oxo-1H-pyrazol-1-yl)benzoic acid results in increased expression of GCNT3 mRNA	increases^expression	26191083
gcnt3	9,10-dihydro-9,10-dihydroxybenzo(a)pyrene	C020738	24909-09-9	GCNT3	9245	Homo sapiens	9606	9,10-dihydro-9,10-dihydroxybenzo(a)pyrene results in increased expression of GCNT3 mRNA	increases^expression	26238291
gcnt3	Acetaminophen	D000082	103-90-2	GCNT3	9245	Homo sapiens	9606	Acetaminophen results in decreased expression of GCNT3 mRNA	decreases^expression	21420995|29067470
gcnt3	Acetaminophen	D000082	103-90-2	GCNT3	9245	Homo sapiens	9606	Acetaminophen results in increased expression of GCNT3 mRNA	increases^expression	22230336
gcnt3	adefovir dipivoxil	C106812	142340-99-6	GCNT3	9245	Homo sapiens	9606	adefovir dipivoxil results in increased expression of GCNT3 mRNA	increases^expression	25596134
gcnt3	Aflatoxin B1	D016604	1162-65-8	GCNT3	9245	Homo sapiens	9606	Aflatoxin B1 results in increased expression of GCNT3 mRNA	increases^expression	27153756
gcnt3	Antimony	D000965	7440-36-0	GCNT3	9245	Homo sapiens	9606	Antimony results in increased expression of GCNT3 mRNA	increases^expression	17547211
gcnt3	Antimony Potassium Tartrate	D000966	28300-74-5	GCNT3	9245	Homo sapiens	9606	Antimony Potassium Tartrate results in increased expression of GCNT3 mRNA	increases^expression	17547211
gcnt3	Arsenic Trioxide	D000077237	1327-53-3	GCNT3	9245	Homo sapiens	9606	Arsenic Trioxide results in decreased expression of GCNT3 mRNA	decreases^expression	21461292
gcnt3	Arsenic Trioxide	D000077237	1327-53-3	GCNT3	9245	Homo sapiens	9606	GCNT3 protein results in decreased susceptibility to Arsenic Trioxide	decreases^response to substance	20707922
gcnt3	Azathioprine	D001379	446-86-6	GCNT3	9245	Homo sapiens	9606	Azathioprine results in increased expression of GCNT3 mRNA	increases^expression	22623647|26198647
gcnt3	Benzo(a)pyrene	D001564	50-32-8	GCNT3	9245	Homo sapiens	9606	Benzo(a)pyrene affects the methylation of GCNT3 5' UTR	affects^methylation	27901495
gcnt3	Benzo(a)pyrene	D001564	50-32-8	GCNT3	9245	Homo sapiens	9606	Benzo(a)pyrene results in decreased methylation of GCNT3 3' UTR	decreases^methylation	27901495
gcnt3	Benzo(a)pyrene	D001564	50-32-8	GCNT3	9245	Homo sapiens	9606	Benzo(a)pyrene results in increased expression of GCNT3 mRNA	increases^expression	19737606|20106945|21632981|22316170|26198647|26238291|32234424
gcnt3	beta-Naphthoflavone	D019324	6051-87-2	GCNT3	9245	Homo sapiens	9606	beta-Naphthoflavone results in increased expression of GCNT3 mRNA	increases^expression	19737606
gcnt3	bisphenol A	C006780	1980-05-07	GCNT3	9245	Homo sapiens	9606	bisphenol A affects the expression of GCNT3 mRNA	affects^expression	30903817
gcnt3	bis(tri-n-butyltin)oxide	C005961		GCNT3	9245	Homo sapiens	9606	bis(tri-n-butyltin)oxide results in increased expression of GCNT3 mRNA	increases^expression	26198647
gcnt3	Cadmium Chloride	D019256	10108-64-2	GCNT3	9245	Homo sapiens	9606	Cadmium Chloride results in increased expression of GCNT3 mRNA	increases^expression	25596134
gcnt3	Calcitriol	D002117	32222-06-3	GCNT3	9245	Homo sapiens	9606	Calcitriol results in increased expression of GCNT3 mRNA	increases^expression	16002434
gcnt3	CGP 52608	C092451	87958-67-6	GCNT3	9245	Homo sapiens	9606	CGP 52608 promotes the reaction [RORA protein binds to GCNT3 gene]	affects^binding|increases^reaction	28238834
gcnt3	chloroacetaldehyde	C004656	107-20-0	GCNT3	9245	Homo sapiens	9606	chloroacetaldehyde results in increased expression of GCNT3 mRNA	increases^expression	25596134
gcnt3	Cidofovir	D000077404	113852-37-2	GCNT3	9245	Homo sapiens	9606	Cidofovir results in increased expression of GCNT3 mRNA	increases^expression	25596134
gcnt3	Cisplatin	D002945	15663-27-1	GCNT3	9245	Homo sapiens	9606	[Cisplatin co-treated with jinfukang] results in increased expression of GCNT3 mRNA	affects^cotreatment|increases^expression	27392435
gcnt3	Cisplatin	D002945	15663-27-1	GCNT3	9245	Homo sapiens	9606	Cisplatin results in increased expression of GCNT3 mRNA	increases^expression	27392435
gcnt3	Copper	D003300	7440-50-8	GCNT3	9245	Homo sapiens	9606	[NSC 689534 binds to Copper] which results in increased expression of GCNT3 mRNA	affects^binding|increases^expression	20971185
gcnt3	Copper Sulfate	D019327	7758-98-7	GCNT3	9245	Homo sapiens	9606	Copper Sulfate results in increased expression of GCNT3 mRNA	increases^expression	19549813
gcnt3	cresidine	C013453	120-71-8	GCNT3	9245	Homo sapiens	9606	cresidine results in increased expression of GCNT3 mRNA	increases^expression	26198647
gcnt3	Cyclosporine	D016572	59865-13-3	GCNT3	9245	Homo sapiens	9606	Cyclosporine results in increased expression of GCNT3 mRNA	increases^expression	20106945|21632981|25562108|25596134|27989131
gcnt3	cylindrospermopsin	C089595	143545-90-8	GCNT3	9245	Homo sapiens	9606	cylindrospermopsin results in increased expression of GCNT3 mRNA	increases^expression	24921660
gcnt3	Diazinon	D003976	333-41-5	GCNT3	9245	Homo sapiens	9606	Diazinon results in increased expression of GCNT3 mRNA	increases^expression	26198647
gcnt3	diethyl maleate	C014476	141-05-9	GCNT3	9245	Homo sapiens	9606	diethyl maleate results in increased expression of GCNT3 mRNA	increases^expression	33545341
gcnt3	Diethylstilbestrol	D004054	56-53-1	GCNT3	9245	Homo sapiens	9606	Diethylstilbestrol results in increased expression of GCNT3 mRNA	increases^expression	26198647
gcnt3	Dimethylnitrosamine	D004128	62-75-9	GCNT3	9245	Homo sapiens	9606	Dimethylnitrosamine results in decreased expression of GCNT3 mRNA	decreases^expression	26198647
gcnt3	Dimethylnitrosamine	D004128	62-75-9	GCNT3	9245	Homo sapiens	9606	Dimethylnitrosamine results in increased expression of GCNT3 mRNA	increases^expression	17547211
gcnt3	Estradiol	D004958	50-28-2	GCNT3	9245	Homo sapiens	9606	Estradiol results in increased expression of GCNT3 mRNA	increases^expression	20106945|31614463
gcnt3	ethyl acrylate	C040833	140-88-5	GCNT3	9245	Homo sapiens	9606	ethyl acrylate results in increased expression of GCNT3 mRNA	increases^expression	26198647
gcnt3	Fenofibrate	D011345	49562-28-9	GCNT3	9245	Homo sapiens	9606	Fenofibrate results in increased expression of GCNT3 mRNA	increases^expression	25596134
gcnt3	Fonofos	D004397	944-22-9	GCNT3	9245	Homo sapiens	9606	Fonofos results in increased methylation of GCNT3 promoter	increases^methylation	22847954
gcnt3	Hydrogen Peroxide	D006861	7722-84-1	GCNT3	9245	Homo sapiens	9606	Hydrogen Peroxide affects the expression of GCNT3 mRNA	affects^expression	20044591|23410634
gcnt3	Ibuprofen	D007052	15687-27-1	GCNT3	9245	Homo sapiens	9606	Ibuprofen results in increased expression of GCNT3 mRNA	increases^expression	25596134
gcnt3	ICG 001	C492448		GCNT3	9245	Homo sapiens	9606	ICG 001 results in increased expression of GCNT3 mRNA	increases^expression	26191083
gcnt3	Isotretinoin	D015474	4759-48-2	GCNT3	9245	Homo sapiens	9606	Isotretinoin results in increased expression of GCNT3 mRNA	increases^expression	18769122
gcnt3	jinfukang	C544151		GCNT3	9245	Homo sapiens	9606	[Cisplatin co-treated with jinfukang] results in increased expression of GCNT3 mRNA	affects^cotreatment|increases^expression	27392435
gcnt3	jinfukang	C544151		GCNT3	9245	Homo sapiens	9606	jinfukang results in increased expression of GCNT3 mRNA	increases^expression	27392435
gcnt3	(+)-JQ1 compound	C561695		GCNT3	9245	Homo sapiens	9606	(+)-JQ1 compound results in decreased expression of GCNT3 mRNA	decreases^expression	26752646
gcnt3	K 7174	C410337		GCNT3	9245	Homo sapiens	9606	K 7174 results in increased expression of GCNT3 mRNA	increases^expression	24086573
gcnt3	Leflunomide	D000077339	75706-12-6	GCNT3	9245	Homo sapiens	9606	Leflunomide results in increased expression of GCNT3 mRNA	increases^expression	28988120
gcnt3	Lipopolysaccharides	D008070		GCNT3	9245	Homo sapiens	9606	[S-(1,2-dichlorovinyl)cysteine affects the susceptibility to Lipopolysaccharides] which results in increased expression of GCNT3 mRNA	affects^response to substance|increases^expression	35811015
gcnt3	Metformin	D008687	657-24-9	GCNT3	9245	Homo sapiens	9606	Metformin results in increased expression of GCNT3 mRNA	increases^expression	25596134
gcnt3	methyleugenol	C005223	93-15-2	GCNT3	9245	Homo sapiens	9606	methyleugenol results in increased expression of GCNT3 mRNA	increases^expression	32234424
gcnt3	nickel chloride	C022838	7718-54-9	GCNT3	9245	Homo sapiens	9606	nickel chloride results in increased expression of GCNT3 mRNA	increases^expression	17547211
gcnt3	N-Nitrosopyrrolidine	D009242	930-55-2	GCNT3	9245	Homo sapiens	9606	N-Nitrosopyrrolidine results in increased expression of GCNT3 mRNA	increases^expression	32234424
gcnt3	NSC668394	C570897		GCNT3	9245	Homo sapiens	9606	NSC668394 results in increased expression of GCNT3 mRNA	increases^expression	27137931
gcnt3	NSC 689534	C558013		GCNT3	9245	Homo sapiens	9606	[NSC 689534 binds to Copper] which results in increased expression of GCNT3 mRNA	affects^binding|increases^expression	20971185
gcnt3	NVP-BKM120	C571178		GCNT3	9245	Homo sapiens	9606	[sotorasib co-treated with trametinib co-treated with NVP-BKM120] results in decreased expression of GCNT3 mRNA	affects^cotreatment|decreases^expression	36139627
gcnt3	ochratoxin A	C025589	303-47-9	GCNT3	9245	Homo sapiens	9606	ochratoxin A results in decreased expression of GCNT3 mRNA	decreases^expression	30559759
gcnt3	Oxygen	D010100	7782-44-7	GCNT3	9245	Homo sapiens	9606	Oxygen deficiency results in decreased expression of GCNT3 mRNA	decreases^expression	25596134
gcnt3	Parathion	D010278	56-38-2	GCNT3	9245	Homo sapiens	9606	Parathion results in increased methylation of GCNT3 promoter	increases^methylation	22847954
gcnt3	pirinixic acid	C006253	50892-23-4	GCNT3	9245	Homo sapiens	9606	[pirinixic acid binds to and results in increased activity of PPARA protein] which results in decreased expression of GCNT3 mRNA	affects^binding|decreases^expression|increases^activity	19710929
gcnt3	Plant Extracts	D010936		GCNT3	9245	Homo sapiens	9606	[Plant Extracts co-treated with Resveratrol] results in decreased expression of GCNT3 mRNA	affects^cotreatment|decreases^expression	23557933
gcnt3	potassium bromate	C019536	7758-01-02	GCNT3	9245	Homo sapiens	9606	potassium bromate results in increased expression of GCNT3 mRNA	increases^expression	30559759
gcnt3	Quercetin	D011794	117-39-5	GCNT3	9245	Homo sapiens	9606	Quercetin affects the expression of GCNT3 mRNA	affects^expression	21632981
gcnt3	Reserpine	D012110	50-55-5	GCNT3	9245	Homo sapiens	9606	Reserpine results in increased expression of GCNT3 mRNA	increases^expression	26198647
gcnt3	Resveratrol	D000077185		GCNT3	9245	Homo sapiens	9606	[Plant Extracts co-treated with Resveratrol] results in decreased expression of GCNT3 mRNA	affects^cotreatment|decreases^expression	23557933
gcnt3	S-(1,2-dichlorovinyl)cysteine	C039961	627-72-5	GCNT3	9245	Homo sapiens	9606	[S-(1,2-dichlorovinyl)cysteine affects the susceptibility to Lipopolysaccharides] which results in increased expression of GCNT3 mRNA	affects^response to substance|increases^expression	35811015
gcnt3	Silicon Dioxide	D012822	7631-86-9	GCNT3	9245	Homo sapiens	9606	Silicon Dioxide results in decreased expression of GCNT3 mRNA	decreases^expression	25351596
gcnt3	Sodium Selenite	D018038	10102-18-8	GCNT3	9245	Homo sapiens	9606	Sodium Selenite results in decreased expression of GCNT3 mRNA	decreases^expression	18175754
gcnt3	sotorasib	C000706028		GCNT3	9245	Homo sapiens	9606	[sotorasib co-treated with trametinib co-treated with NVP-BKM120] results in decreased expression of GCNT3 mRNA	affects^cotreatment|decreases^expression	36139627
gcnt3	sulforaphane	C016766		GCNT3	9245	Homo sapiens	9606	sulforaphane results in increased expression of GCNT3 mRNA	increases^expression	31838189
gcnt3	Temozolomide	D000077204	85622-93-1	GCNT3	9245	Homo sapiens	9606	Temozolomide results in decreased expression of GCNT3 mRNA	decreases^expression	31758290
gcnt3	terbufos	C012568	13071-79-9	GCNT3	9245	Homo sapiens	9606	terbufos results in increased methylation of GCNT3 promoter	increases^methylation	22847954
gcnt3	tert-Butylhydroperoxide	D020122	75-91-2	GCNT3	9245	Homo sapiens	9606	tert-Butylhydroperoxide results in increased expression of GCNT3 mRNA	increases^expression	23410634
gcnt3	Tetrachlorodibenzodioxin	D013749	1746-01-6	GCNT3	9245	Homo sapiens	9606	Tetrachlorodibenzodioxin results in increased expression of GCNT3 mRNA	increases^expression	20106945|21632981|26198647|26238291
gcnt3	Tetradecanoylphorbol Acetate	D013755	16561-29-8	GCNT3	9245	Homo sapiens	9606	Tetradecanoylphorbol Acetate results in increased expression of GCNT3 mRNA	increases^expression	26198647
gcnt3	Tobacco Smoke Pollution	D014028		GCNT3	9245	Homo sapiens	9606	Tobacco Smoke Pollution affects the expression of GCNT3 protein	affects^expression	30291989
gcnt3	Tobacco Smoke Pollution	D014028		GCNT3	9245	Homo sapiens	9606	Tobacco Smoke Pollution results in increased expression of GCNT3 mRNA	increases^expression	33660061
gcnt3	trametinib	C560077		GCNT3	9245	Homo sapiens	9606	[sotorasib co-treated with trametinib co-treated with NVP-BKM120] results in decreased expression of GCNT3 mRNA	affects^cotreatment|decreases^expression	36139627
gcnt3	tris(1,3-dichloro-2-propyl)phosphate	C016805	13674-87-8	GCNT3	9245	Homo sapiens	9606	tris(1,3-dichloro-2-propyl)phosphate results in increased expression of GCNT3 mRNA	increases^expression	26179874
gcnt3	tris(2-butoxyethyl) phosphate	C013320	78-51-3	GCNT3	9245	Homo sapiens	9606	tris(2-butoxyethyl) phosphate affects the expression of GCNT3 mRNA	affects^expression	29024780
gcnt3	Valproic Acid	D014635	99-66-1	GCNT3	9245	Homo sapiens	9606	Valproic Acid results in increased expression of GCNT3 mRNA	increases^expression	29154799
gcnt3	Vitamin K 3	D024483	58-27-5	GCNT3	9245	Homo sapiens	9606	Vitamin K 3 results in increased expression of GCNT3 mRNA	increases^expression	23410634
gcnt3	Zoledronic Acid	D000077211		GCNT3	9245	Homo sapiens	9606	Zoledronic Acid results in increased expression of GCNT3 mRNA	increases^expression	24714768|25596134
suox	4-octylphenol	C080417	1806-26-4	SUOX	6821	Homo sapiens	9606	4-octylphenol results in decreased expression of SUOX mRNA	decreases^expression	16223563
suox	abrine	C496492		SUOX	6821	Homo sapiens	9606	abrine results in decreased expression of SUOX mRNA	decreases^expression	31054353
suox	Acetaminophen	D000082	103-90-2	SUOX	6821	Homo sapiens	9606	Acetaminophen results in decreased expression of SUOX mRNA	decreases^expression	29067470
suox	Acetaminophen	D000082	103-90-2	SUOX	6821	Homo sapiens	9606	Acetaminophen results in increased expression of SUOX mRNA	increases^expression	25704631
suox	avobenzone	C049935		SUOX	6821	Homo sapiens	9606	avobenzone results in decreased expression of SUOX mRNA	decreases^expression	31016361
suox	Benzo(a)pyrene	D001564	50-32-8	SUOX	6821	Homo sapiens	9606	Benzo(a)pyrene affects the methylation of SUOX exon	affects^methylation	30157460
suox	Benzo(a)pyrene	D001564	50-32-8	SUOX	6821	Homo sapiens	9606	Benzo(a)pyrene results in decreased expression of SUOX mRNA	decreases^expression	32234424
suox	Benzo(a)pyrene	D001564	50-32-8	SUOX	6821	Homo sapiens	9606	Benzo(a)pyrene results in increased methylation of SUOX 5' UTR	increases^methylation	27901495
suox	beta-methylcholine	C044887	7562-87-0	SUOX	6821	Homo sapiens	9606	beta-methylcholine affects the expression of SUOX mRNA	affects^expression	21179406
suox	bisphenol A	C006780	1980-05-07	SUOX	6821	Homo sapiens	9606	bisphenol A results in increased expression of SUOX mRNA	increases^expression	29275510
suox	Cannabidiol	D002185	13956-29-1	SUOX	6821	Homo sapiens	9606	Cannabidiol results in decreased expression of SUOX mRNA	decreases^expression	33244087
suox	Copper Sulfate	D019327	7758-98-7	SUOX	6821	Homo sapiens	9606	Copper Sulfate results in decreased expression of SUOX mRNA	decreases^expression	19549813
suox	Cyclosporine	D016572	59865-13-3	SUOX	6821	Homo sapiens	9606	Cyclosporine results in decreased expression of SUOX mRNA	decreases^expression	20106945|25562108
suox	Diazinon	D003976	333-41-5	SUOX	6821	Homo sapiens	9606	Diazinon results in increased methylation of SUOX gene	increases^methylation	22964155
suox	Diethylhexyl Phthalate	D004051	117-81-7	SUOX	6821	Homo sapiens	9606	Diethylhexyl Phthalate results in decreased expression of SUOX mRNA	decreases^expression	16223563
suox	diisodecyl phthalate	C042080	26761-40-0	SUOX	6821	Homo sapiens	9606	diisodecyl phthalate results in decreased expression of SUOX mRNA	decreases^expression	16223563
suox	epigallocatechin gallate	C045651	989-51-5	SUOX	6821	Homo sapiens	9606	[potassium chromate(VI) co-treated with epigallocatechin gallate] results in decreased expression of SUOX mRNA	affects^cotreatment|decreases^expression	22079256
suox	Estradiol	D004958	50-28-2	SUOX	6821	Homo sapiens	9606	Estradiol results in decreased expression of SUOX mRNA	decreases^expression	31614463
suox	GSK-J4	C000593030		SUOX	6821	Homo sapiens	9606	GSK-J4 results in decreased expression of SUOX mRNA	decreases^expression	29301935
suox	Hydrogen Peroxide	D006861	7722-84-1	SUOX	6821	Homo sapiens	9606	Hydrogen Peroxide affects the expression of SUOX mRNA	affects^expression	23410634
suox	Ivermectin	D007559	70288-86-7	SUOX	6821	Homo sapiens	9606	Ivermectin results in decreased expression of SUOX protein	decreases^expression	32959892
suox	Lipopolysaccharides	D008070		SUOX	6821	Homo sapiens	9606	Lipopolysaccharides results in decreased expression of SUOX mRNA	decreases^expression	35811015
suox	Lipopolysaccharides	D008070		SUOX	6821	Homo sapiens	9606	[S-(1,2-dichlorovinyl)cysteine affects the susceptibility to Lipopolysaccharides] which results in increased expression of SUOX mRNA	affects^response to substance|increases^expression	35811015
suox	perfluorohexanesulfonic acid	C471071	355-46-4	SUOX	6821	Homo sapiens	9606	perfluorohexanesulfonic acid results in decreased expression of SUOX mRNA	decreases^expression	25812627
suox	perfluoro-n-nonanoic acid	C101816	375-95-1	SUOX	6821	Homo sapiens	9606	perfluoro-n-nonanoic acid results in decreased expression of SUOX mRNA	decreases^expression	25812627|32588087
suox	perfluorooctanoic acid	C023036	335-67-1	SUOX	6821	Homo sapiens	9606	perfluorooctanoic acid results in decreased expression of SUOX mRNA	decreases^expression	25812627
suox	potassium chromate(VI)	C027373	7789-00-6	SUOX	6821	Homo sapiens	9606	[potassium chromate(VI) co-treated with epigallocatechin gallate] results in decreased expression of SUOX mRNA	affects^cotreatment|decreases^expression	22079256
suox	potassium chromate(VI)	C027373	7789-00-6	SUOX	6821	Homo sapiens	9606	potassium chromate(VI) results in decreased expression of SUOX mRNA	decreases^expression	22079256
suox	Quercetin	D011794	117-39-5	SUOX	6821	Homo sapiens	9606	Quercetin results in decreased expression of SUOX mRNA	decreases^expression	21632981
suox	S-(1,2-dichlorovinyl)cysteine	C039961	627-72-5	SUOX	6821	Homo sapiens	9606	[S-(1,2-dichlorovinyl)cysteine affects the susceptibility to Lipopolysaccharides] which results in increased expression of SUOX mRNA	affects^response to substance|increases^expression	35811015
suox	Silicon Dioxide	D012822	7631-86-9	SUOX	6821	Homo sapiens	9606	Silicon Dioxide results in decreased expression of SUOX mRNA	decreases^expression	25351596
suox	Sunitinib	D000077210		SUOX	6821	Homo sapiens	9606	Sunitinib results in decreased expression of SUOX mRNA	decreases^expression	31533062
suox	tert-Butylhydroperoxide	D020122	75-91-2	SUOX	6821	Homo sapiens	9606	tert-Butylhydroperoxide affects the expression of SUOX mRNA	affects^expression	23410634
suox	Tobacco Smoke Pollution	D014028		SUOX	6821	Homo sapiens	9606	Tobacco Smoke Pollution results in decreased expression of SUOX mRNA	decreases^expression	33660061
suox	Tretinoin	D014212	302-79-4	SUOX	6821	Homo sapiens	9606	Tretinoin results in increased expression of SUOX mRNA	increases^expression	17218384|33167477
suox	tris(1,3-dichloro-2-propyl)phosphate	C016805	13674-87-8	SUOX	6821	Homo sapiens	9606	tris(1,3-dichloro-2-propyl)phosphate results in decreased expression of SUOX mRNA	decreases^expression	26179874
suox	Tunicamycin	D014415	11089-65-9	SUOX	6821	Homo sapiens	9606	Tunicamycin results in decreased expression of SUOX mRNA	decreases^expression	22378314
suox	Valproic Acid	D014635	99-66-1	SUOX	6821	Homo sapiens	9606	Valproic Acid affects the expression of SUOX mRNA	affects^expression	25979313
suox	Vitamin K 3	D024483	58-27-5	SUOX	6821	Homo sapiens	9606	Vitamin K 3 affects the expression of SUOX mRNA	affects^expression	23410634
gmds	4-(4-((5-(4,5-dimethyl-2-nitrophenyl)-2-furanyl)methylene)-4,5-dihydro-3-methyl-5-oxo-1H-pyrazol-1-yl)benzoic acid	C584509		GMDS	2762	Homo sapiens	9606	4-(4-((5-(4,5-dimethyl-2-nitrophenyl)-2-furanyl)methylene)-4,5-dihydro-3-methyl-5-oxo-1H-pyrazol-1-yl)benzoic acid results in increased expression of GMDS mRNA	increases^expression	26191083
gmds	4-(5-benzo(1,3)dioxol-5-yl-4-pyridin-2-yl-1H-imidazol-2-yl)benzamide	C459179		GMDS	2762	Homo sapiens	9606	[NOG protein co-treated with Valproic Acid co-treated with dorsomorphin co-treated with 4-(5-benzo(1,3)dioxol-5-yl-4-pyridin-2-yl-1H-imidazol-2-yl)benzamide] results in increased expression of GMDS mRNA	affects^cotreatment|increases^expression	27188386
gmds	Acetaminophen	D000082	103-90-2	GMDS	2762	Homo sapiens	9606	Acetaminophen results in decreased expression of GMDS mRNA	decreases^expression	22230336|26690555
gmds	Aflatoxin B1	D016604	1162-65-8	GMDS	2762	Homo sapiens	9606	Aflatoxin B1 affects the expression of GMDS protein	affects^expression	20106945
gmds	Aflatoxin B1	D016604	1162-65-8	GMDS	2762	Homo sapiens	9606	Aflatoxin B1 affects the methylation of GMDS intron	affects^methylation	30157460
gmds	Aflatoxin B1	D016604	1162-65-8	GMDS	2762	Homo sapiens	9606	Aflatoxin B1 results in decreased expression of GMDS mRNA	decreases^expression	22100608|27153756|31555880|32234424
gmds	Aflatoxin B1	D016604	1162-65-8	GMDS	2762	Homo sapiens	9606	Aflatoxin B1 results in increased methylation of GMDS gene	increases^methylation	31555880
gmds	aflatoxin B2	C029753	22040-96-6	GMDS	2762	Homo sapiens	9606	aflatoxin B2 results in increased methylation of GMDS intron	increases^methylation	30157460
gmds	Antirheumatic Agents	D018501		GMDS	2762	Homo sapiens	9606	Antirheumatic Agents results in decreased expression of GMDS mRNA	decreases^expression	24449571
gmds	aristolochic acid I	C000228	313-67-7	GMDS	2762	Homo sapiens	9606	aristolochic acid I results in decreased expression of GMDS mRNA	decreases^expression	33212167
gmds	Benzo(a)pyrene	D001564	50-32-8	GMDS	2762	Homo sapiens	9606	Benzo(a)pyrene affects the methylation of GMDS intron	affects^methylation	30157460
gmds	Benzo(a)pyrene	D001564	50-32-8	GMDS	2762	Homo sapiens	9606	Benzo(a)pyrene results in decreased expression of GMDS mRNA	decreases^expression	20064835|20106945|21632981|22316170|26238291|31555880|32234424
gmds	Benzo(a)pyrene	D001564	50-32-8	GMDS	2762	Homo sapiens	9606	Benzo(a)pyrene results in increased methylation of GMDS gene	increases^methylation	31555880
gmds	benzo(e)pyrene	C026487	192-97-2	GMDS	2762	Homo sapiens	9606	benzo(e)pyrene affects the methylation of GMDS intron	affects^methylation	30157460
gmds	beta-methylcholine	C044887	7562-87-0	GMDS	2762	Homo sapiens	9606	beta-methylcholine affects the expression of GMDS mRNA	affects^expression	21179406
gmds	bis(4-hydroxyphenyl)sulfone	C543008	1980-09-01	GMDS	2762	Homo sapiens	9606	bis(4-hydroxyphenyl)sulfone results in decreased methylation of GMDS gene	decreases^methylation	31601247
gmds	bisphenol A	C006780	1980-05-07	GMDS	2762	Homo sapiens	9606	[bisphenol A co-treated with Fulvestrant] results in decreased methylation of GMDS gene	affects^cotreatment|decreases^methylation	31601247
gmds	bisphenol A	C006780	1980-05-07	GMDS	2762	Homo sapiens	9606	bisphenol A results in decreased methylation of GMDS gene	decreases^methylation	31601247
gmds	bisphenol A	C006780	1980-05-07	GMDS	2762	Homo sapiens	9606	bisphenol A results in increased expression of GMDS mRNA	increases^expression	29275510
gmds	candoxin	C459604		GMDS	2762	Homo sapiens	9606	candoxin results in decreased expression of GMDS mRNA	decreases^expression	16309724
gmds	CGP 52608	C092451	87958-67-6	GMDS	2762	Homo sapiens	9606	CGP 52608 promotes the reaction [RORA protein binds to GMDS gene]	affects^binding|increases^reaction	28238834
gmds	Cisplatin	D002945	15663-27-1	GMDS	2762	Homo sapiens	9606	[Cisplatin co-treated with jinfukang] results in decreased expression of GMDS mRNA	affects^cotreatment|decreases^expression	27392435
gmds	Cisplatin	D002945	15663-27-1	GMDS	2762	Homo sapiens	9606	Cisplatin results in decreased expression of GMDS mRNA	decreases^expression	19561079|27392435|27594783
gmds	cobaltous chloride	C018021	7646-79-9	GMDS	2762	Homo sapiens	9606	cobaltous chloride results in decreased expression of GMDS mRNA	decreases^expression	19376846
gmds	Copper Sulfate	D019327	7758-98-7	GMDS	2762	Homo sapiens	9606	Copper Sulfate results in decreased expression of GMDS mRNA	decreases^expression	19549813
gmds	Cyclosporine	D016572	59865-13-3	GMDS	2762	Homo sapiens	9606	Cyclosporine results in increased expression of GMDS mRNA	increases^expression	27989131
gmds	Decitabine	D000077209	2353-33-5	GMDS	2762	Homo sapiens	9606	Decitabine results in decreased expression of GMDS mRNA	decreases^expression	19194470
gmds	Diazinon	D003976	333-41-5	GMDS	2762	Homo sapiens	9606	Diazinon results in increased methylation of GMDS gene	increases^methylation	22964155
gmds	dorsomorphin	C516138		GMDS	2762	Homo sapiens	9606	[NOG protein co-treated with Valproic Acid co-treated with dorsomorphin co-treated with 4-(5-benzo(1,3)dioxol-5-yl-4-pyridin-2-yl-1H-imidazol-2-yl)benzamide] results in increased expression of GMDS mRNA	affects^cotreatment|increases^expression	27188386
gmds	enzalutamide	C540278		GMDS	2762	Homo sapiens	9606	enzalutamide affects the expression of GMDS mRNA	affects^expression	30940724
gmds	Enzyme Inhibitors	D004791		GMDS	2762	Homo sapiens	9606	[Enzyme Inhibitors results in decreased activity of OGA protein] which results in increased O-linked glycosylation of GMDS protein	decreases^activity|increases^O-linked glycosylation	23301498
gmds	Ethyl Methanesulfonate	D005020	62-50-0	GMDS	2762	Homo sapiens	9606	Ethyl Methanesulfonate results in decreased expression of GMDS mRNA	decreases^expression	23649840
gmds	Formaldehyde	D005557	50-00-0	GMDS	2762	Homo sapiens	9606	Formaldehyde results in decreased expression of GMDS mRNA	decreases^expression	23649840
gmds	Fulvestrant	D000077267	129453-61-8	GMDS	2762	Homo sapiens	9606	[bisphenol A co-treated with Fulvestrant] results in decreased methylation of GMDS gene	affects^cotreatment|decreases^methylation	31601247
gmds	Guanosine Diphosphate	D006153	146-91-8	GMDS	2762	Homo sapiens	9606	Guanosine Diphosphate binds to GMDS protein	affects^binding	25526675
gmds	Guanosine Monophosphate	D006157	85-32-5	GMDS	2762	Homo sapiens	9606	Guanosine Monophosphate binds to GMDS protein	affects^binding	25526675
gmds	Guanylyl Imidodiphosphate	D006165	34273-04-6	GMDS	2762	Homo sapiens	9606	Guanylyl Imidodiphosphate binds to GMDS protein	affects^binding	25526675
gmds	ICG 001	C492448		GMDS	2762	Homo sapiens	9606	ICG 001 results in increased expression of GMDS mRNA	increases^expression	26191083
gmds	jinfukang	C544151		GMDS	2762	Homo sapiens	9606	[Cisplatin co-treated with jinfukang] results in decreased expression of GMDS mRNA	affects^cotreatment|decreases^expression	27392435
gmds	Methapyrilene	D008701	91-80-5	GMDS	2762	Homo sapiens	9606	Methapyrilene affects the methylation of GMDS intron	affects^methylation	30157460
gmds	methyleugenol	C005223	93-15-2	GMDS	2762	Homo sapiens	9606	methyleugenol results in decreased expression of GMDS mRNA	decreases^expression	32234424
gmds	Methyl Methanesulfonate	D008741	66-27-3	GMDS	2762	Homo sapiens	9606	Methyl Methanesulfonate results in decreased expression of GMDS mRNA	decreases^expression	23649840
gmds	NADP	D009249	53-59-8	GMDS	2762	Homo sapiens	9606	NADP binds to and results in increased activity of GMDS protein	affects^binding|increases^activity	25526675
gmds	N-Nitrosopyrrolidine	D009242	930-55-2	GMDS	2762	Homo sapiens	9606	N-Nitrosopyrrolidine results in decreased expression of GMDS mRNA	decreases^expression	32234424
gmds	Quercetin	D011794	117-39-5	GMDS	2762	Homo sapiens	9606	Quercetin results in decreased expression of GMDS mRNA	decreases^expression	21632981
gmds	Silicon Dioxide	D012822	7631-86-9	GMDS	2762	Homo sapiens	9606	Silicon Dioxide analog results in decreased expression of GMDS mRNA	decreases^expression	25895662
gmds	sulforaphane	C016766		GMDS	2762	Homo sapiens	9606	sulforaphane results in decreased expression of GMDS mRNA	decreases^expression	31838189
gmds	Temozolomide	D000077204	85622-93-1	GMDS	2762	Homo sapiens	9606	Temozolomide results in increased expression of GMDS mRNA	increases^expression	31758290
gmds	Testosterone	D013739	58-22-0	GMDS	2762	Homo sapiens	9606	Testosterone results in decreased expression of GMDS mRNA	decreases^expression	33359661
gmds	Tetrachlorodibenzodioxin	D013749	1746-01-6	GMDS	2762	Homo sapiens	9606	Tetrachlorodibenzodioxin results in decreased expression of GMDS mRNA	decreases^expression	20106945|21632981
gmds	Thimerosal	D013849	54-64-8	GMDS	2762	Homo sapiens	9606	Thimerosal results in decreased expression of GMDS mRNA	decreases^expression	27188386
gmds	Tobacco Smoke Pollution	D014028		GMDS	2762	Homo sapiens	9606	Tobacco Smoke Pollution results in increased expression of GMDS mRNA	increases^expression	33660061
gmds	Topotecan	D019772	123948-87-8	GMDS	2762	Homo sapiens	9606	GMDS protein affects the susceptibility to Topotecan	affects^response to substance	16217747
gmds	Valproic Acid	D014635	99-66-1	GMDS	2762	Homo sapiens	9606	[NOG protein co-treated with Valproic Acid co-treated with dorsomorphin co-treated with 4-(5-benzo(1,3)dioxol-5-yl-4-pyridin-2-yl-1H-imidazol-2-yl)benzamide] results in increased expression of GMDS mRNA	affects^cotreatment|increases^expression	27188386
gmds	Valproic Acid	D014635	99-66-1	GMDS	2762	Homo sapiens	9606	Valproic Acid affects the expression of GMDS mRNA	affects^expression	25979313
gmds	Valproic Acid	D014635	99-66-1	GMDS	2762	Homo sapiens	9606	Valproic Acid results in increased expression of GMDS mRNA	increases^expression	23179753|25192806|26272509|28001369|29154799
sms	1-Methyl-3-isobutylxanthine	D015056	28822-58-4	SMS	6611	Homo sapiens	9606	[INS protein co-treated with Dexamethasone co-treated with 1-Methyl-3-isobutylxanthine co-treated with Indomethacin co-treated with bisphenol A] results in decreased expression of SMS mRNA	affects^cotreatment|decreases^expression	28628672
sms	2,4,6-tribromophenol	C004554	118-79-6	SMS	6611	Homo sapiens	9606	2,4,6-tribromophenol results in decreased expression of SMS mRNA	decreases^expression	31675489
sms	4-(4-((5-(4,5-dimethyl-2-nitrophenyl)-2-furanyl)methylene)-4,5-dihydro-3-methyl-5-oxo-1H-pyrazol-1-yl)benzoic acid	C584509		SMS	6611	Homo sapiens	9606	4-(4-((5-(4,5-dimethyl-2-nitrophenyl)-2-furanyl)methylene)-4,5-dihydro-3-methyl-5-oxo-1H-pyrazol-1-yl)benzoic acid results in decreased expression of SMS mRNA	decreases^expression	26191083
sms	abrine	C496492		SMS	6611	Homo sapiens	9606	abrine results in increased expression of SMS mRNA	increases^expression	31054353
sms	aflatoxin B2	C029753	22040-96-6	SMS	6611	Homo sapiens	9606	aflatoxin B2 affects the methylation of SMS intron	affects^methylation	30157460
sms	aristolochic acid I	C000228	313-67-7	SMS	6611	Homo sapiens	9606	aristolochic acid I results in decreased expression of SMS mRNA	decreases^expression	33212167
sms	aristolochic acid I	C000228	313-67-7	SMS	6611	Homo sapiens	9606	aristolochic acid I results in increased expression of SMS protein	increases^expression	33212167
sms	Arsenic Trioxide	D000077237	1327-53-3	SMS	6611	Homo sapiens	9606	Arsenic Trioxide results in increased expression of SMS mRNA	increases^expression	22521957
sms	Atrazine	D001280	1912-24-9	SMS	6611	Homo sapiens	9606	Atrazine results in increased expression of SMS mRNA	increases^expression	22378314
sms	Azathioprine	D001379	446-86-6	SMS	6611	Homo sapiens	9606	Azathioprine results in decreased expression of SMS mRNA	decreases^expression	19192274
sms	Benzo(a)pyrene	D001564	50-32-8	SMS	6611	Homo sapiens	9606	Benzo(a)pyrene affects the methylation of SMS intron	affects^methylation	30157460
sms	Benzo(a)pyrene	D001564	50-32-8	SMS	6611	Homo sapiens	9606	Benzo(a)pyrene results in increased methylation of SMS promoter	increases^methylation	27901495
sms	bisphenol A	C006780	1980-05-07	SMS	6611	Homo sapiens	9606	bisphenol A results in decreased expression of SMS mRNA	decreases^expression	33670352
sms	bisphenol A	C006780	1980-05-07	SMS	6611	Homo sapiens	9606	bisphenol A results in increased expression of SMS mRNA	increases^expression	15223131|18007998
sms	bisphenol A	C006780	1980-05-07	SMS	6611	Homo sapiens	9606	[INS protein co-treated with Dexamethasone co-treated with 1-Methyl-3-isobutylxanthine co-treated with Indomethacin co-treated with bisphenol A] results in decreased expression of SMS mRNA	affects^cotreatment|decreases^expression	28628672
sms	Cadmium Chloride	D019256	10108-64-2	SMS	6611	Homo sapiens	9606	Cadmium Chloride results in increased expression of SMS protein	increases^expression	24527689
sms	CGP 52608	C092451	87958-67-6	SMS	6611	Homo sapiens	9606	CGP 52608 promotes the reaction [RORA protein binds to SMS gene]	affects^binding|increases^reaction	28238834
sms	chloropicrin	C100187	1976-06-02	SMS	6611	Homo sapiens	9606	chloropicrin affects the expression of SMS mRNA	affects^expression	26352163
sms	chloropicrin	C100187	1976-06-02	SMS	6611	Homo sapiens	9606	chloropicrin results in decreased expression of SMS mRNA	decreases^expression	28476498
sms	Dexamethasone	D003907	1950-02-02	SMS	6611	Homo sapiens	9606	[INS protein co-treated with Dexamethasone co-treated with 1-Methyl-3-isobutylxanthine co-treated with Indomethacin co-treated with bisphenol A] results in decreased expression of SMS mRNA	affects^cotreatment|decreases^expression	28628672
sms	Diethylhexyl Phthalate	D004051	117-81-7	SMS	6611	Homo sapiens	9606	Diethylhexyl Phthalate results in increased expression of SMS mRNA	increases^expression	31163220
sms	Dihydrotestosterone	D013196	521-18-6	SMS	6611	Homo sapiens	9606	Dihydrotestosterone results in increased expression of SMS mRNA	increases^expression	18007998|29581250
sms	Fluorouracil	D005472	51-21-8	SMS	6611	Homo sapiens	9606	Fluorouracil results in increased expression of SMS mRNA	increases^expression	15152939
sms	Fluorouracil	D005472	51-21-8	SMS	6611	Homo sapiens	9606	TP53 protein affects the reaction [Fluorouracil results in decreased expression of SMS mRNA]	affects^reaction|decreases^expression	15016801
sms	Gold Sodium Thiomalate	D006052	12244-57-4	SMS	6611	Homo sapiens	9606	Gold Sodium Thiomalate results in decreased expression of SMS mRNA	decreases^expression	19192274
sms	hexabrominated diphenyl ether 153	C517828		SMS	6611	Homo sapiens	9606	hexabrominated diphenyl ether 153 results in decreased expression of SMS protein	decreases^expression	31675489
sms	ICG 001	C492448		SMS	6611	Homo sapiens	9606	ICG 001 results in decreased expression of SMS mRNA	decreases^expression	26191083
sms	incobotulinumtoxinA	C545476		SMS	6611	Homo sapiens	9606	incobotulinumtoxinA results in decreased expression of SMS mRNA	decreases^expression	29522793
sms	Indomethacin	D007213	53-86-1	SMS	6611	Homo sapiens	9606	[INS protein co-treated with Dexamethasone co-treated with 1-Methyl-3-isobutylxanthine co-treated with Indomethacin co-treated with bisphenol A] results in decreased expression of SMS mRNA	affects^cotreatment|decreases^expression	28628672
sms	Ivermectin	D007559	70288-86-7	SMS	6611	Homo sapiens	9606	Ivermectin results in decreased expression of SMS protein	decreases^expression	32959892
sms	Lactic Acid	D019344	50-21-5	SMS	6611	Homo sapiens	9606	Lactic Acid results in decreased expression of SMS mRNA	decreases^expression	30851411
sms	Methotrexate	D008727	1959-05-02	SMS	6611	Homo sapiens	9606	Methotrexate results in decreased expression of SMS mRNA	decreases^expression	19192274
sms	Methyl Methanesulfonate	D008741	66-27-3	SMS	6611	Homo sapiens	9606	Methyl Methanesulfonate results in decreased expression of SMS mRNA	decreases^expression	23649840
sms	Methylprednisolone	D008775	83-43-2	SMS	6611	Homo sapiens	9606	Methylprednisolone results in decreased expression of SMS mRNA	decreases^expression	19192274
sms	Metribolone	D015741	965-93-5	SMS	6611	Homo sapiens	9606	Metribolone results in increased expression of SMS protein	increases^expression	17152098
sms	pentabrominated diphenyl ether 100	C517827		SMS	6611	Homo sapiens	9606	pentabrominated diphenyl ether 100 results in decreased expression of SMS protein	decreases^expression	31675489
sms	Piroxicam	D010894	36322-90-4	SMS	6611	Homo sapiens	9606	Piroxicam results in decreased expression of SMS mRNA	decreases^expression	19192274
sms	Prednisolone	D011239	50-24-8	SMS	6611	Homo sapiens	9606	Prednisolone results in decreased expression of SMS mRNA	decreases^expression	19192274
sms	Smoke	D012906		SMS	6611	Homo sapiens	9606	Smoke results in increased expression of SMS mRNA	increases^expression	34520756
sms	sodium arsenite	C017947	13768-07-5	SMS	6611	Homo sapiens	9606	sodium arsenite affects the methylation of SMS gene	affects^methylation	28589171
sms	Sunitinib	D000077210		SMS	6611	Homo sapiens	9606	Sunitinib results in decreased expression of SMS mRNA	decreases^expression	31533062
sms	T-2 Toxin	D013605	21259-20-1	SMS	6611	Homo sapiens	9606	T-2 Toxin results in increased expression of SMS mRNA	increases^expression	31863870
sms	tetrahydropalmatine	C014215	10097-84-4	SMS	6611	Homo sapiens	9606	tetrahydropalmatine results in decreased expression of SMS protein	decreases^expression	20109541
sms	Tobacco Smoke Pollution	D014028		SMS	6611	Homo sapiens	9606	Tobacco Smoke Pollution results in decreased expression of SMS mRNA	decreases^expression	28065790
sms	Tobacco Smoke Pollution	D014028		SMS	6611	Homo sapiens	9606	Tobacco Smoke Pollution results in increased expression of SMS mRNA	increases^expression	33660061
sms	Tobacco Smoke Pollution	D014028		SMS	6611	Homo sapiens	9606	Tobacco Smoke Pollution results in increased methylation of SMS intron	increases^methylation	31039056
sms	Valproic Acid	D014635	99-66-1	SMS	6611	Homo sapiens	9606	Valproic Acid results in increased expression of SMS mRNA	increases^expression	26272509
srm	14-deoxy-11,12-didehydroandrographolide	C495626		SRM	6723	Homo sapiens	9606	14-deoxy-11,12-didehydroandrographolide results in decreased expression of SRM mRNA	decreases^expression	22101062
srm	2-(1H-indazol-4-yl)-6-(4-methanesulfonylpiperazin-1-ylmethyl)-4-morpholin-4-ylthieno(3,2-d)pyrimidine	C532162		SRM	6723	Homo sapiens	9606	[PIK3CA gene mutant form results in increased susceptibility to 2-(1H-indazol-4-yl)-6-(4-methanesulfonylpiperazin-1-ylmethyl)-4-morpholin-4-ylthieno(3,2-d)pyrimidine] which results in decreased expression of SRM mRNA	decreases^expression|increases^response to substance	20453058
srm	2,3-bis(3'-hydroxybenzyl)butyrolactone	C029497	76543-15-2	SRM	6723	Homo sapiens	9606	[Coumestrol co-treated with 2,3-bis(3'-hydroxybenzyl)butyrolactone] results in increased expression of SRM mRNA	affects^cotreatment|increases^expression	19167446
srm	4-chloro-N-((4-(1,1-dimethylethyl)phenyl)methyl)-3-ethyl-1-methyl-1H-pyrazole-5-carboxamide	C429623	119168-77-3	SRM	6723	Homo sapiens	9606	4-chloro-N-((4-(1,1-dimethylethyl)phenyl)methyl)-3-ethyl-1-methyl-1H-pyrazole-5-carboxamide results in increased expression of SRM mRNA	increases^expression	33512557
srm	Acrylamide	D020106	1979-06-01	SRM	6723	Homo sapiens	9606	Acrylamide results in decreased expression of SRM mRNA	decreases^expression	32763439
srm	afimoxifene	C016601	68392-35-8	SRM	6723	Homo sapiens	9606	afimoxifene inhibits the reaction [Estrogens results in increased expression of SRM mRNA]	decreases^reaction|increases^expression	21233418
srm	alpha phellandrene	C005403	99-83-2	SRM	6723	Homo sapiens	9606	alpha phellandrene results in decreased expression of SRM mRNA	decreases^expression	25075043
srm	azoxystrobin	C087670	131860-33-8	SRM	6723	Homo sapiens	9606	azoxystrobin results in increased expression of SRM mRNA	increases^expression	33512557
srm	beauvericin	C004456	26048-05-5	SRM	6723	Homo sapiens	9606	beauvericin results in decreased expression of SRM mRNA	decreases^expression	29203277
srm	Benzo(a)pyrene	D001564	50-32-8	SRM	6723	Homo sapiens	9606	Benzo(a)pyrene results in increased expression of SRM protein	increases^expression	22138271
srm	Benzo(a)pyrene	D001564	50-32-8	SRM	6723	Homo sapiens	9606	Methionine inhibits the reaction [Benzo(a)pyrene results in increased expression of SRM protein]	decreases^reaction|increases^expression	22138271
srm	bisphenol A	C006780	1980-05-07	SRM	6723	Homo sapiens	9606	bisphenol A affects the expression of SRM mRNA	affects^expression	30903817
srm	bisphenol A	C006780	1980-05-07	SRM	6723	Homo sapiens	9606	bisphenol A results in decreased expression of SRM mRNA	decreases^expression	29718440
srm	bisphenol A	C006780	1980-05-07	SRM	6723	Homo sapiens	9606	bisphenol A results in increased methylation of SRM gene	increases^methylation	31601247
srm	Caffeine	D002110	1958-08-02	SRM	6723	Homo sapiens	9606	Caffeine results in decreased phosphorylation of SRM protein	decreases^phosphorylation	35688186
srm	Calcitriol	D002117	32222-06-3	SRM	6723	Homo sapiens	9606	Calcitriol results in decreased expression of SRM mRNA	decreases^expression	12875902
srm	Cisplatin	D002945	15663-27-1	SRM	6723	Homo sapiens	9606	Cisplatin results in decreased expression of SRM mRNA	decreases^expression	27594783
srm	cobaltous chloride	C018021	7646-79-9	SRM	6723	Homo sapiens	9606	cobaltous chloride results in decreased expression of SRM mRNA	decreases^expression	19320972|22202117
srm	cobaltous chloride	C018021	7646-79-9	SRM	6723	Homo sapiens	9606	zinc chloride inhibits the reaction [cobaltous chloride results in decreased expression of SRM mRNA]	decreases^expression|decreases^reaction	22202117
srm	Copper	D003300	7440-50-8	SRM	6723	Homo sapiens	9606	[NSC 689534 binds to Copper] which results in decreased expression of SRM mRNA	affects^binding|decreases^expression	20971185
srm	Copper Sulfate	D019327	7758-98-7	SRM	6723	Homo sapiens	9606	Copper Sulfate results in decreased expression of SRM mRNA	decreases^expression	19549813
srm	Coumestrol	D003375	479-13-0	SRM	6723	Homo sapiens	9606	[Coumestrol co-treated with 2,3-bis(3'-hydroxybenzyl)butyrolactone] results in increased expression of SRM mRNA	affects^cotreatment|increases^expression	19167446
srm	Coumestrol	D003375	479-13-0	SRM	6723	Homo sapiens	9606	Coumestrol results in increased expression of SRM mRNA	increases^expression	19167446
srm	Cyclophosphamide	D003520	50-18-0	SRM	6723	Homo sapiens	9606	[Doxorubicin co-treated with Cyclophosphamide] affects the expression of SRM mRNA	affects^cotreatment|affects^expression	16322899
srm	Cyclosporine	D016572	59865-13-3	SRM	6723	Homo sapiens	9606	Cyclosporine results in increased expression of SRM mRNA	increases^expression	20106945|27989131
srm	cypermethrin	C017160	52315-07-8	SRM	6723	Homo sapiens	9606	cypermethrin results in increased expression of SRM mRNA	increases^expression	32573024
srm	Demecolcine	D003703	477-30-5	SRM	6723	Homo sapiens	9606	Demecolcine results in decreased expression of SRM mRNA	decreases^expression	23649840
srm	dicrotophos	C000944	3735-78-2	SRM	6723	Homo sapiens	9606	dicrotophos results in increased expression of SRM mRNA	increases^expression	28302478
srm	Doxorubicin	D004317	23214-92-8	SRM	6723	Homo sapiens	9606	[Doxorubicin co-treated with Cyclophosphamide] affects the expression of SRM mRNA	affects^cotreatment|affects^expression	16322899
srm	Estradiol	D004958	50-28-2	SRM	6723	Homo sapiens	9606	Estradiol results in increased expression of SRM mRNA	increases^expression	23019147|31614463
srm	Estrogens	D004967		SRM	6723	Homo sapiens	9606	afimoxifene inhibits the reaction [Estrogens results in increased expression of SRM mRNA]	decreases^reaction|increases^expression	21233418
srm	Estrogens	D004967		SRM	6723	Homo sapiens	9606	Estrogens results in increased expression of SRM mRNA	increases^expression	21233418
srm	Ethanol	D000431	64-17-5	SRM	6723	Homo sapiens	9606	Ethanol results in decreased expression of SRM protein	decreases^expression	20621659
srm	Ethyl Methanesulfonate	D005020	62-50-0	SRM	6723	Homo sapiens	9606	Ethyl Methanesulfonate results in decreased expression of SRM mRNA	decreases^expression	23649840
srm	Genistein	D019833	446-72-0	SRM	6723	Homo sapiens	9606	Genistein results in increased expression of SRM mRNA	increases^expression	23019147
srm	Hydrogen Peroxide	D006861	7722-84-1	SRM	6723	Homo sapiens	9606	Hydrogen Peroxide affects the expression of SRM mRNA	affects^expression	20044591
srm	Ivermectin	D007559	70288-86-7	SRM	6723	Homo sapiens	9606	Ivermectin results in decreased expression of SRM protein	decreases^expression	32959892
srm	(+)-JQ1 compound	C561695		SRM	6723	Homo sapiens	9606	(+)-JQ1 compound results in decreased expression of SRM mRNA	decreases^expression	21889194
srm	K 7174	C410337		SRM	6723	Homo sapiens	9606	K 7174 results in decreased expression of SRM mRNA	decreases^expression	24086573
srm	Methionine	D008715	63-68-3	SRM	6723	Homo sapiens	9606	Methionine inhibits the reaction [Benzo(a)pyrene results in increased expression of SRM protein]	decreases^reaction|increases^expression	22138271
srm	Methotrexate	D008727	1959-05-02	SRM	6723	Homo sapiens	9606	Methotrexate results in decreased expression of SRM mRNA	decreases^expression	17400583
srm	Methyl Methanesulfonate	D008741	66-27-3	SRM	6723	Homo sapiens	9606	Methyl Methanesulfonate results in decreased expression of SRM mRNA	decreases^expression	23649840
srm	Nickel	D009532	7440-02-0	SRM	6723	Homo sapiens	9606	Nickel results in increased expression of SRM mRNA	increases^expression	24768652|25583101
srm	NSC 689534	C558013		SRM	6723	Homo sapiens	9606	[NSC 689534 binds to Copper] which results in decreased expression of SRM mRNA	affects^binding|decreases^expression	20971185
srm	Plant Extracts	D010936		SRM	6723	Homo sapiens	9606	Plant Extracts results in decreased expression of SRM mRNA	decreases^expression	24677778
srm	Silicon Dioxide	D012822	7631-86-9	SRM	6723	Homo sapiens	9606	Silicon Dioxide analog results in increased expression of SRM mRNA	increases^expression	25895662
srm	Silicon Dioxide	D012822	7631-86-9	SRM	6723	Homo sapiens	9606	Silicon Dioxide results in decreased methylation of SRM promoter	decreases^methylation	34973136
srm	Smoke	D012906		SRM	6723	Homo sapiens	9606	Smoke results in decreased expression of SRM mRNA	decreases^expression	34520756
srm	sodium arsenite	C017947	13768-07-5	SRM	6723	Homo sapiens	9606	sodium arsenite results in decreased expression of SRM protein	decreases^expression	20050688
srm	sodium arsenite	C017947	13768-07-5	SRM	6723	Homo sapiens	9606	sodium arsenite results in increased expression of SRM mRNA	increases^expression	34032870
srm	TAK-243	C000622638		SRM	6723	Homo sapiens	9606	TAK-243 results in increased sumoylation of SRM protein	increases^sumoylation	31285264
srm	Tetrachlorodibenzodioxin	D013749	1746-01-6	SRM	6723	Homo sapiens	9606	Tetrachlorodibenzodioxin results in decreased expression of SRM mRNA	decreases^expression	21632981
srm	Tobacco Smoke Pollution	D014028		SRM	6723	Homo sapiens	9606	Tobacco Smoke Pollution results in increased expression of SRM mRNA	increases^expression	33660061
srm	Tretinoin	D014212	302-79-4	SRM	6723	Homo sapiens	9606	Tretinoin results in decreased expression of SRM mRNA	decreases^expression	12875902|33167477
srm	Urethane	D014520	51-79-6	SRM	6723	Homo sapiens	9606	Urethane results in decreased expression of SRM mRNA	decreases^expression	28818685
srm	Valproic Acid	D014635	99-66-1	SRM	6723	Homo sapiens	9606	Valproic Acid results in increased expression of SRM mRNA	increases^expression	23179753
srm	Valproic Acid	D014635	99-66-1	SRM	6723	Homo sapiens	9606	Valproic Acid results in increased methylation of SRM gene	increases^methylation	29154799
srm	Vincristine	D014750		SRM	6723	Homo sapiens	9606	Vincristine results in decreased expression of SRM mRNA	decreases^expression	23649840
srm	zinc chloride	C016837	7646-85-7	SRM	6723	Homo sapiens	9606	zinc chloride inhibits the reaction [cobaltous chloride results in decreased expression of SRM mRNA]	decreases^expression|decreases^reaction	22202117
gys2	4,4'-hexafluorisopropylidene diphenol	C583074		GYS2	2998	Homo sapiens	9606	4,4'-hexafluorisopropylidene diphenol results in increased expression of GYS2 mRNA	increases^expression	31121516
gys2	Acetaminophen	D000082	103-90-2	GYS2	2998	Homo sapiens	9606	Acetaminophen results in decreased expression of GYS2 mRNA	decreases^expression	29067470
gys2	Aflatoxin B1	D016604	1162-65-8	GYS2	2998	Homo sapiens	9606	Aflatoxin B1 affects the expression of GYS2 protein	affects^expression	20106945
gys2	Aflatoxin B1	D016604	1162-65-8	GYS2	2998	Homo sapiens	9606	Aflatoxin B1 results in decreased expression of GYS2 mRNA	decreases^expression	27153756
gys2	Aflatoxin B1	D016604	1162-65-8	GYS2	2998	Homo sapiens	9606	Aflatoxin B1 results in decreased methylation of GYS2 gene	decreases^methylation	27153756
gys2	Benzo(a)pyrene	D001564	50-32-8	GYS2	2998	Homo sapiens	9606	Benzo(a)pyrene results in decreased expression of GYS2 mRNA	decreases^expression	20106945|32234424
gys2	bis(4-hydroxyphenyl)sulfone	C543008	1980-09-01	GYS2	2998	Homo sapiens	9606	bis(4-hydroxyphenyl)sulfone results in increased expression of GYS2 mRNA	increases^expression	31121516
gys2	bisphenol A	C006780	1980-05-07	GYS2	2998	Homo sapiens	9606	bisphenol A results in increased expression of GYS2 mRNA	increases^expression	31121516
gys2	bisphenol F	C000611646		GYS2	2998	Homo sapiens	9606	bisphenol F results in increased expression of GYS2 mRNA	increases^expression	31121516
gys2	butyraldehyde	C018475	123-72-8	GYS2	2998	Homo sapiens	9606	butyraldehyde results in decreased expression of GYS2 mRNA	decreases^expression	26079696
gys2	CGP 52608	C092451	87958-67-6	GYS2	2998	Homo sapiens	9606	CGP 52608 promotes the reaction [RORA protein binds to GYS2 gene]	affects^binding|increases^reaction	28238834
gys2	Cisplatin	D002945	15663-27-1	GYS2	2998	Homo sapiens	9606	[Cisplatin co-treated with jinfukang] results in decreased expression of GYS2 mRNA	affects^cotreatment|decreases^expression	27392435
gys2	Cisplatin	D002945	15663-27-1	GYS2	2998	Homo sapiens	9606	Cisplatin results in decreased expression of GYS2 mRNA	decreases^expression	27392435
gys2	Cyclosporine	D016572	59865-13-3	GYS2	2998	Homo sapiens	9606	Cyclosporine results in decreased expression of GYS2 mRNA	decreases^expression	20106945
gys2	Endosulfan	D004726	115-29-7	GYS2	2998	Homo sapiens	9606	Endosulfan inhibits the reaction [Tetrachlorodibenzodioxin results in decreased expression of GYS2 mRNA]	decreases^expression|decreases^reaction	26159488
gys2	Estradiol	D004958	50-28-2	GYS2	2998	Homo sapiens	9606	Estradiol results in decreased expression of GYS2 mRNA	decreases^expression	20106945
gys2	jinfukang	C544151		GYS2	2998	Homo sapiens	9606	[Cisplatin co-treated with jinfukang] results in decreased expression of GYS2 mRNA	affects^cotreatment|decreases^expression	27392435
gys2	jinfukang	C544151		GYS2	2998	Homo sapiens	9606	jinfukang results in decreased expression of GYS2 mRNA	decreases^expression	27392435
gys2	methyleugenol	C005223	93-15-2	GYS2	2998	Homo sapiens	9606	methyleugenol results in decreased expression of GYS2 mRNA	decreases^expression	32234424
gys2	obeticholic acid	C464660		GYS2	2998	Homo sapiens	9606	obeticholic acid results in increased expression of GYS2 mRNA	increases^expression	27939613
gys2	p-coumaric acid	C495469		GYS2	2998	Homo sapiens	9606	p-coumaric acid results in increased activity of GYS2 protein	increases^activity	34342938
gys2	p-coumaric acid	C495469		GYS2	2998	Homo sapiens	9606	[procyanidin B1 co-treated with p-coumaric acid] results in increased activity of GYS2 protein	affects^cotreatment|increases^activity	34342938
gys2	pentanal	C046012	110-62-3	GYS2	2998	Homo sapiens	9606	pentanal results in decreased expression of GYS2 mRNA	decreases^expression	26079696
gys2	perfluoro-n-nonanoic acid	C101816	375-95-1	GYS2	2998	Homo sapiens	9606	perfluoro-n-nonanoic acid results in decreased expression of GYS2 mRNA	decreases^expression	32588087
gys2	procyanidin B1	C479579	20315-25-7	GYS2	2998	Homo sapiens	9606	[procyanidin B1 co-treated with p-coumaric acid] results in increased activity of GYS2 protein	affects^cotreatment|increases^activity	34342938
gys2	procyanidin B1	C479579	20315-25-7	GYS2	2998	Homo sapiens	9606	procyanidin B1 results in increased activity of GYS2 protein	increases^activity	34342938
gys2	sodium arsenite	C017947	13768-07-5	GYS2	2998	Homo sapiens	9606	sodium arsenite results in decreased expression of GYS2 mRNA	decreases^expression	29301061
gys2	Tetrachlorodibenzodioxin	D013749	1746-01-6	GYS2	2998	Homo sapiens	9606	Endosulfan inhibits the reaction [Tetrachlorodibenzodioxin results in decreased expression of GYS2 mRNA]	decreases^expression|decreases^reaction	26159488
gys2	Tetrachlorodibenzodioxin	D013749	1746-01-6	GYS2	2998	Homo sapiens	9606	Tetrachlorodibenzodioxin results in decreased expression of GYS2 mRNA	decreases^expression	20106945|26159488|31520823
mgat4a	4-(5-benzo(1,3)dioxol-5-yl-4-pyridin-2-yl-1H-imidazol-2-yl)benzamide	C459179		MGAT4A	11320	Homo sapiens	9606	[NOG protein co-treated with Phenylmercuric Acetate co-treated with dorsomorphin co-treated with 4-(5-benzo(1,3)dioxol-5-yl-4-pyridin-2-yl-1H-imidazol-2-yl)benzamide] results in decreased expression of MGAT4A mRNA	affects^cotreatment|decreases^expression	27188386
mgat4a	4-(5-benzo(1,3)dioxol-5-yl-4-pyridin-2-yl-1H-imidazol-2-yl)benzamide	C459179		MGAT4A	11320	Homo sapiens	9606	[NOG protein co-treated with trichostatin A co-treated with dorsomorphin co-treated with 4-(5-benzo(1,3)dioxol-5-yl-4-pyridin-2-yl-1H-imidazol-2-yl)benzamide] results in decreased expression of MGAT4A mRNA	affects^cotreatment|decreases^expression	27188386
mgat4a	abrine	C496492		MGAT4A	11320	Homo sapiens	9606	abrine results in decreased expression of MGAT4A mRNA	decreases^expression	31054353
mgat4a	Acetaminophen	D000082	103-90-2	MGAT4A	11320	Homo sapiens	9606	Acetaminophen results in increased expression of MGAT4A mRNA	increases^expression	26497421
mgat4a	Aflatoxin B1	D016604	1162-65-8	MGAT4A	11320	Homo sapiens	9606	Aflatoxin B1 results in decreased expression of MGAT4A mRNA	decreases^expression	22100608
mgat4a	Aflatoxin B1	D016604	1162-65-8	MGAT4A	11320	Homo sapiens	9606	Aflatoxin B1 results in increased methylation of MGAT4A intron	increases^methylation	30157460
mgat4a	Amiodarone	D000638	1951-25-3	MGAT4A	11320	Homo sapiens	9606	Amiodarone results in increased expression of MGAT4A mRNA	increases^expression	19774075
mgat4a	Antirheumatic Agents	D018501		MGAT4A	11320	Homo sapiens	9606	Antirheumatic Agents results in decreased expression of MGAT4A mRNA	decreases^expression	24449571
mgat4a	Benzo(a)pyrene	D001564	50-32-8	MGAT4A	11320	Homo sapiens	9606	Benzo(a)pyrene results in decreased methylation of MGAT4A promoter	decreases^methylation	27901495
mgat4a	benzo(e)pyrene	C026487	192-97-2	MGAT4A	11320	Homo sapiens	9606	benzo(e)pyrene results in decreased methylation of MGAT4A intron	decreases^methylation	30157460
mgat4a	Carbamazepine	D002220	298-46-4	MGAT4A	11320	Homo sapiens	9606	Carbamazepine affects the expression of MGAT4A mRNA	affects^expression	25979313
mgat4a	cobaltous chloride	C018021	7646-79-9	MGAT4A	11320	Homo sapiens	9606	cobaltous chloride results in decreased expression of MGAT4A mRNA	decreases^expression	19320972
mgat4a	cobaltous chloride	C018021	7646-79-9	MGAT4A	11320	Homo sapiens	9606	cobaltous chloride results in increased expression of MGAT4A mRNA	increases^expression	20105288
mgat4a	Cyclosporine	D016572	59865-13-3	MGAT4A	11320	Homo sapiens	9606	Cyclosporine results in decreased expression of MGAT4A mRNA	decreases^expression	25562108
mgat4a	Cyclosporine	D016572	59865-13-3	MGAT4A	11320	Homo sapiens	9606	Cyclosporine results in increased methylation of MGAT4A promoter	increases^methylation	27989131
mgat4a	dicrotophos	C000944	3735-78-2	MGAT4A	11320	Homo sapiens	9606	dicrotophos results in decreased expression of MGAT4A mRNA	decreases^expression	28302478
mgat4a	dorsomorphin	C516138		MGAT4A	11320	Homo sapiens	9606	[NOG protein co-treated with Phenylmercuric Acetate co-treated with dorsomorphin co-treated with 4-(5-benzo(1,3)dioxol-5-yl-4-pyridin-2-yl-1H-imidazol-2-yl)benzamide] results in decreased expression of MGAT4A mRNA	affects^cotreatment|decreases^expression	27188386
mgat4a	dorsomorphin	C516138		MGAT4A	11320	Homo sapiens	9606	[NOG protein co-treated with trichostatin A co-treated with dorsomorphin co-treated with 4-(5-benzo(1,3)dioxol-5-yl-4-pyridin-2-yl-1H-imidazol-2-yl)benzamide] results in decreased expression of MGAT4A mRNA	affects^cotreatment|decreases^expression	27188386
mgat4a	Doxorubicin	D004317	23214-92-8	MGAT4A	11320	Homo sapiens	9606	Doxorubicin results in decreased expression of MGAT4A mRNA	decreases^expression	29803840
mgat4a	Dronabinol	D013759		MGAT4A	11320	Homo sapiens	9606	Dronabinol results in decreased expression of MGAT4A mRNA	decreases^expression	32103029
mgat4a	Estradiol	D004958	50-28-2	MGAT4A	11320	Homo sapiens	9606	[Estradiol co-treated with TGFB1 protein] results in decreased expression of MGAT4A mRNA	affects^cotreatment|decreases^expression	30165855
mgat4a	Estradiol	D004958	50-28-2	MGAT4A	11320	Homo sapiens	9606	Estradiol results in decreased expression of MGAT4A mRNA	decreases^expression	21185374
mgat4a	GSK-J4	C000593030		MGAT4A	11320	Homo sapiens	9606	GSK-J4 results in increased expression of MGAT4A mRNA	increases^expression	29301935
mgat4a	jinfukang	C544151		MGAT4A	11320	Homo sapiens	9606	jinfukang results in decreased expression of MGAT4A mRNA	decreases^expression	27392435
mgat4a	(+)-JQ1 compound	C561695		MGAT4A	11320	Homo sapiens	9606	(+)-JQ1 compound results in increased expression of MGAT4A mRNA	increases^expression	24796395
mgat4a	Lead	D007854	7439-92-1	MGAT4A	11320	Homo sapiens	9606	Lead affects the expression of MGAT4A mRNA	affects^expression	28903495
mgat4a	Lipopolysaccharides	D008070		MGAT4A	11320	Homo sapiens	9606	[Lipopolysaccharides co-treated with Resveratrol] results in decreased expression of MGAT4A mRNA	affects^cotreatment|decreases^expression	26667767
mgat4a	Lipopolysaccharides	D008070		MGAT4A	11320	Homo sapiens	9606	[S-(1,2-dichlorovinyl)cysteine co-treated with Lipopolysaccharides] results in decreased expression of MGAT4A mRNA	affects^cotreatment|decreases^expression	35811015
mgat4a	Magnetite Nanoparticles	D058185		MGAT4A	11320	Homo sapiens	9606	[Succimer co-treated with Magnetite Nanoparticles] results in increased expression of MGAT4A mRNA	affects^cotreatment|increases^expression	26378955
mgat4a	Methapyrilene	D008701	91-80-5	MGAT4A	11320	Homo sapiens	9606	Methapyrilene results in decreased methylation of MGAT4A intron	decreases^methylation	30157460
mgat4a	methylmercuric chloride	C004925	115-09-3	MGAT4A	11320	Homo sapiens	9606	methylmercuric chloride results in decreased expression of MGAT4A mRNA	decreases^expression	28001369
mgat4a	Nickel	D009532	7440-02-0	MGAT4A	11320	Homo sapiens	9606	Nickel results in increased expression of MGAT4A mRNA	increases^expression	24768652|25583101
mgat4a	Phenylmercuric Acetate	D010662	62-38-4	MGAT4A	11320	Homo sapiens	9606	[NOG protein co-treated with Phenylmercuric Acetate co-treated with dorsomorphin co-treated with 4-(5-benzo(1,3)dioxol-5-yl-4-pyridin-2-yl-1H-imidazol-2-yl)benzamide] results in decreased expression of MGAT4A mRNA	affects^cotreatment|decreases^expression	27188386
mgat4a	Phenylmercuric Acetate	D010662	62-38-4	MGAT4A	11320	Homo sapiens	9606	Phenylmercuric Acetate results in decreased expression of MGAT4A mRNA	decreases^expression	26272509
mgat4a	potassium chromate(VI)	C027373	7789-00-6	MGAT4A	11320	Homo sapiens	9606	potassium chromate(VI) results in increased expression of MGAT4A mRNA	increases^expression	22714537
mgat4a	propionaldehyde	C005556	123-38-6	MGAT4A	11320	Homo sapiens	9606	propionaldehyde results in increased expression of MGAT4A mRNA	increases^expression	26079696
mgat4a	Resveratrol	D000077185		MGAT4A	11320	Homo sapiens	9606	[Lipopolysaccharides co-treated with Resveratrol] results in decreased expression of MGAT4A mRNA	affects^cotreatment|decreases^expression	26667767
mgat4a	S-(1,2-dichlorovinyl)cysteine	C039961	627-72-5	MGAT4A	11320	Homo sapiens	9606	[S-(1,2-dichlorovinyl)cysteine co-treated with Lipopolysaccharides] results in decreased expression of MGAT4A mRNA	affects^cotreatment|decreases^expression	35811015
mgat4a	sodium arsenite	C017947	13768-07-5	MGAT4A	11320	Homo sapiens	9606	sodium arsenite results in decreased expression of MGAT4A mRNA	decreases^expression	34032870
mgat4a	sodium arsenite	C017947	13768-07-5	MGAT4A	11320	Homo sapiens	9606	sodium arsenite results in increased expression of MGAT4A mRNA	increases^expression	17879257
mgat4a	Succimer	D004113	304-55-2	MGAT4A	11320	Homo sapiens	9606	[Succimer co-treated with Magnetite Nanoparticles] results in increased expression of MGAT4A mRNA	affects^cotreatment|increases^expression	26378955
mgat4a	Sunitinib	D000077210		MGAT4A	11320	Homo sapiens	9606	Sunitinib results in decreased expression of MGAT4A mRNA	decreases^expression	31533062
mgat4a	Tobacco Smoke Pollution	D014028		MGAT4A	11320	Homo sapiens	9606	Tobacco Smoke Pollution results in increased expression of MGAT4A mRNA	increases^expression	33660061
mgat4a	Tretinoin	D014212	302-79-4	MGAT4A	11320	Homo sapiens	9606	Tretinoin results in increased expression of MGAT4A mRNA	increases^expression	23724009|33167477
mgat4a	trichostatin A	C012589	58880-19-6	MGAT4A	11320	Homo sapiens	9606	[NOG protein co-treated with trichostatin A co-treated with dorsomorphin co-treated with 4-(5-benzo(1,3)dioxol-5-yl-4-pyridin-2-yl-1H-imidazol-2-yl)benzamide] results in decreased expression of MGAT4A mRNA	affects^cotreatment|decreases^expression	27188386
mgat4a	trichostatin A	C012589	58880-19-6	MGAT4A	11320	Homo sapiens	9606	trichostatin A results in decreased expression of MGAT4A mRNA	decreases^expression	24935251|26272509
mgat4a	trichostatin A	C012589	58880-19-6	MGAT4A	11320	Homo sapiens	9606	trichostatin A results in increased expression of MGAT4A mRNA	increases^expression	24935251
mgat4a	Valproic Acid	D014635	99-66-1	MGAT4A	11320	Homo sapiens	9606	Valproic Acid affects the expression of MGAT4A mRNA	affects^expression	25979313
mgat4a	Valproic Acid	D014635	99-66-1	MGAT4A	11320	Homo sapiens	9606	Valproic Acid results in increased expression of MGAT4A mRNA	increases^expression	24935251
mgat4a	Valproic Acid	D014635	99-66-1	MGAT4A	11320	Homo sapiens	9606	Valproic Acid results in increased methylation of MGAT4A gene	increases^methylation	29154799
mgat4a	Vanadates	D014638		MGAT4A	11320	Homo sapiens	9606	Vanadates results in decreased expression of MGAT4A mRNA	decreases^expression	22714537
mgat4a	Vincristine	D014750		MGAT4A	11320	Homo sapiens	9606	Vincristine results in decreased expression of MGAT4A mRNA	decreases^expression	23649840
qdpr	2,2',4,4'-tetrabromodiphenyl ether	C511295		QDPR	5860	Homo sapiens	9606	2,2',4,4'-tetrabromodiphenyl ether results in decreased expression of QDPR protein	decreases^expression	31675489
qdpr	3-(2-hydroxy-4-(2-methylnonan-2-yl)phenyl)cyclohexan-1-ol	C572491		QDPR	5860	Homo sapiens	9606	3-(2-hydroxy-4-(2-methylnonan-2-yl)phenyl)cyclohexan-1-ol results in increased expression of QDPR protein	increases^expression	26194647
qdpr	Acetaminophen	D000082	103-90-2	QDPR	5860	Homo sapiens	9606	Acetaminophen results in decreased expression of QDPR mRNA	decreases^expression	29067470
qdpr	Acrylamide	D020106	1979-06-01	QDPR	5860	Homo sapiens	9606	Acrylamide results in decreased expression of QDPR mRNA	decreases^expression	32763439
qdpr	Antirheumatic Agents	D018501		QDPR	5860	Homo sapiens	9606	Antirheumatic Agents results in increased expression of QDPR mRNA	increases^expression	24449571
qdpr	aristolochic acid I	C000228	313-67-7	QDPR	5860	Homo sapiens	9606	aristolochic acid I results in increased expression of QDPR protein	increases^expression	33212167
qdpr	Benzo(a)pyrene	D001564	50-32-8	QDPR	5860	Homo sapiens	9606	Benzo(a)pyrene affects the methylation of QDPR promoter	affects^methylation	27901495
qdpr	Benztropine	D001590	86-13-5	QDPR	5860	Homo sapiens	9606	Benztropine results in decreased expression of QDPR protein	decreases^expression	34122009
qdpr	bisphenol A	C006780	1980-05-07	QDPR	5860	Homo sapiens	9606	bisphenol A affects the expression of QDPR mRNA	affects^expression	30903817
qdpr	bisphenol A	C006780	1980-05-07	QDPR	5860	Homo sapiens	9606	bisphenol A results in decreased expression of QDPR mRNA	decreases^expression	29275510
qdpr	Cadmium	D002104	7440-43-9	QDPR	5860	Homo sapiens	9606	[Cadmium Chloride results in increased abundance of Cadmium] which results in increased expression of QDPR mRNA	increases^abundance|increases^expression	35301059
qdpr	Cadmium	D002104	7440-43-9	QDPR	5860	Homo sapiens	9606	Cadmium results in increased expression of QDPR mRNA	increases^expression	24376830
qdpr	Cadmium Chloride	D019256	10108-64-2	QDPR	5860	Homo sapiens	9606	[Cadmium Chloride results in increased abundance of Cadmium] which results in increased expression of QDPR mRNA	increases^abundance|increases^expression	35301059
qdpr	CGP 52608	C092451	87958-67-6	QDPR	5860	Homo sapiens	9606	CGP 52608 promotes the reaction [RORA protein binds to QDPR gene]	affects^binding|increases^reaction	28238834
qdpr	Cisplatin	D002945	15663-27-1	QDPR	5860	Homo sapiens	9606	Cisplatin results in increased expression of QDPR mRNA	increases^expression	24280081
qdpr	Clozapine	D003024	5786-21-0	QDPR	5860	Homo sapiens	9606	Clozapine results in decreased expression of QDPR protein	decreases^expression	34122009
qdpr	Copper Sulfate	D019327	7758-98-7	QDPR	5860	Homo sapiens	9606	Copper Sulfate results in decreased expression of QDPR mRNA	decreases^expression	19549813
qdpr	Cyclosporine	D016572	59865-13-3	QDPR	5860	Homo sapiens	9606	Cyclosporine results in decreased expression of QDPR mRNA	decreases^expression	20106945|25562108
qdpr	decabromobiphenyl ether	C010902	1163-19-5	QDPR	5860	Homo sapiens	9606	decabromobiphenyl ether results in increased expression of QDPR protein	increases^expression	31675489
qdpr	erucylphospho-N,N,N-trimethylpropylammonium	C472787		QDPR	5860	Homo sapiens	9606	erucylphospho-N,N,N-trimethylpropylammonium results in decreased expression of QDPR mRNA	decreases^expression	29464035
qdpr	Ethyl Methanesulfonate	D005020	62-50-0	QDPR	5860	Homo sapiens	9606	Ethyl Methanesulfonate results in increased expression of QDPR mRNA	increases^expression	23649840
qdpr	ICG 001	C492448		QDPR	5860	Homo sapiens	9606	ICG 001 results in increased expression of QDPR mRNA	increases^expression	26191083
qdpr	Ivermectin	D007559	70288-86-7	QDPR	5860	Homo sapiens	9606	Ivermectin results in decreased expression of QDPR protein	decreases^expression	32959892
qdpr	K 7174	C410337		QDPR	5860	Homo sapiens	9606	K 7174 results in decreased expression of QDPR mRNA	decreases^expression	24086573
qdpr	Methotrexate	D008727	1959-05-02	QDPR	5860	Homo sapiens	9606	Methotrexate results in decreased activity of QDPR protein	decreases^activity	1793349
qdpr	Methyl Methanesulfonate	D008741	66-27-3	QDPR	5860	Homo sapiens	9606	Methyl Methanesulfonate results in increased expression of QDPR mRNA	increases^expression	23649840
qdpr	NADP	D009249	53-59-8	QDPR	5860	Homo sapiens	9606	NADP binds to and results in increased activity of QDPR protein	affects^binding|increases^activity	25526675
qdpr	pentabrominated diphenyl ether 100	C517827		QDPR	5860	Homo sapiens	9606	pentabrominated diphenyl ether 100 results in decreased expression of QDPR protein	decreases^expression	31675489
qdpr	Phenobarbital	D010634	1950-06-06	QDPR	5860	Homo sapiens	9606	Phenobarbital affects the expression of QDPR mRNA	affects^expression	19159669
qdpr	Plant Extracts	D010936		QDPR	5860	Homo sapiens	9606	[Plant Extracts co-treated with Resveratrol] results in increased expression of QDPR mRNA	affects^cotreatment|increases^expression	23557933
qdpr	Plant Extracts	D010936		QDPR	5860	Homo sapiens	9606	Plant Extracts results in decreased expression of QDPR mRNA	decreases^expression	24677778
qdpr	Quercetin	D011794	117-39-5	QDPR	5860	Homo sapiens	9606	Quercetin results in increased expression of QDPR mRNA	increases^expression	21632981
qdpr	Resveratrol	D000077185		QDPR	5860	Homo sapiens	9606	[Plant Extracts co-treated with Resveratrol] results in increased expression of QDPR mRNA	affects^cotreatment|increases^expression	23557933
qdpr	Tobacco Smoke Pollution	D014028		QDPR	5860	Homo sapiens	9606	Tobacco Smoke Pollution results in decreased expression of QDPR mRNA	decreases^expression	33660061
qdpr	Tobacco Smoke Pollution	D014028		QDPR	5860	Homo sapiens	9606	Tobacco Smoke Pollution results in increased expression of QDPR mRNA	increases^expression	30610935
qdpr	Tretinoin	D014212	302-79-4	QDPR	5860	Homo sapiens	9606	Tretinoin results in decreased expression of QDPR mRNA	decreases^expression	33167477
qdpr	Tunicamycin	D014415	11089-65-9	QDPR	5860	Homo sapiens	9606	Tunicamycin results in decreased expression of QDPR mRNA	decreases^expression	22378314
qdpr	Valproic Acid	D014635	99-66-1	QDPR	5860	Homo sapiens	9606	Valproic Acid affects the expression of QDPR mRNA	affects^expression	25979313
qdpr	Valproic Acid	D014635	99-66-1	QDPR	5860	Homo sapiens	9606	Valproic Acid results in decreased methylation of QDPR gene	decreases^methylation	29154799
qdpr	Valproic Acid	D014635	99-66-1	QDPR	5860	Homo sapiens	9606	Valproic Acid results in increased expression of QDPR mRNA	increases^expression	23179753|25192806|28001369|29154799
atp6v1e1	3-(2-hydroxy-4-(2-methylnonan-2-yl)phenyl)cyclohexan-1-ol	C572491		ATP6V1E1	529	Homo sapiens	9606	3-(2-hydroxy-4-(2-methylnonan-2-yl)phenyl)cyclohexan-1-ol results in increased expression of ATP6V1E1 protein	increases^expression	26194647
atp6v1e1	4-aminophenylarsenoxide	C032642	1122-90-3	ATP6V1E1	529	Homo sapiens	9606	4-aminophenylarsenoxide binds to ATP6V1E1 protein	affects^binding	26598702
atp6v1e1	4-aminophenylarsenoxide	C032642	1122-90-3	ATP6V1E1	529	Homo sapiens	9606	Arsenic Trioxide inhibits the reaction [4-aminophenylarsenoxide binds to ATP6V1E1 protein]	affects^binding|decreases^reaction	26598702
atp6v1e1	Acetaminophen	D000082	103-90-2	ATP6V1E1	529	Homo sapiens	9606	Acetaminophen results in increased expression of ATP6V1E1 mRNA	increases^expression	25704631
atp6v1e1	Arsenic	D001151	7440-38-2	ATP6V1E1	529	Homo sapiens	9606	Arsenic affects the methylation of ATP6V1E1 gene	affects^methylation	25304211
atp6v1e1	Arsenic Trioxide	D000077237	1327-53-3	ATP6V1E1	529	Homo sapiens	9606	Arsenic Trioxide inhibits the reaction [4-aminophenylarsenoxide binds to ATP6V1E1 protein]	affects^binding|decreases^reaction	26598702
atp6v1e1	arsenite	C015001	15502-74-6	ATP6V1E1	529	Homo sapiens	9606	arsenite promotes the reaction [G3BP1 protein binds to ATP6V1E1 mRNA]	affects^binding|increases^reaction	32406909
atp6v1e1	Benzo(a)pyrene	D001564	50-32-8	ATP6V1E1	529	Homo sapiens	9606	Benzo(a)pyrene results in increased expression of ATP6V1E1 mRNA	increases^expression	26238291
atp6v1e1	bisphenol A	C006780	1980-05-07	ATP6V1E1	529	Homo sapiens	9606	bisphenol A affects the expression of ATP6V1E1 mRNA	affects^expression	30903817
atp6v1e1	bisphenol A	C006780	1980-05-07	ATP6V1E1	529	Homo sapiens	9606	bisphenol A results in decreased expression of ATP6V1E1 protein	decreases^expression	31675489
atp6v1e1	CGP 52608	C092451	87958-67-6	ATP6V1E1	529	Homo sapiens	9606	CGP 52608 promotes the reaction [RORA protein binds to ATP6V1E1 gene]	affects^binding|increases^reaction	28238834
atp6v1e1	chloropicrin	C100187	1976-06-02	ATP6V1E1	529	Homo sapiens	9606	chloropicrin results in increased expression of ATP6V1E1 mRNA	increases^expression	26352163
atp6v1e1	Cyclosporine	D016572	59865-13-3	ATP6V1E1	529	Homo sapiens	9606	Cyclosporine results in increased expression of ATP6V1E1 mRNA	increases^expression	25562108
atp6v1e1	dicrotophos	C000944	3735-78-2	ATP6V1E1	529	Homo sapiens	9606	dicrotophos results in decreased expression of ATP6V1E1 mRNA	decreases^expression	28302478
atp6v1e1	Doxorubicin	D004317	23214-92-8	ATP6V1E1	529	Homo sapiens	9606	Doxorubicin results in increased expression of ATP6V1E1 mRNA	increases^expression	29803840
atp6v1e1	Glycochenodeoxycholic Acid	D005999	640-79-9	ATP6V1E1	529	Homo sapiens	9606	Glycochenodeoxycholic Acid results in decreased expression of ATP6V1E1 mRNA	decreases^expression	32439580
atp6v1e1	hexabrominated diphenyl ether 153	C517828		ATP6V1E1	529	Homo sapiens	9606	hexabrominated diphenyl ether 153 results in decreased expression of ATP6V1E1 protein	decreases^expression	31675489
atp6v1e1	Ivermectin	D007559	70288-86-7	ATP6V1E1	529	Homo sapiens	9606	Ivermectin results in decreased expression of ATP6V1E1 protein	decreases^expression	32959892
atp6v1e1	Methyl Methanesulfonate	D008741	66-27-3	ATP6V1E1	529	Homo sapiens	9606	Methyl Methanesulfonate results in increased expression of ATP6V1E1 mRNA	increases^expression	23649840
atp6v1e1	pentabrominated diphenyl ether 100	C517827		ATP6V1E1	529	Homo sapiens	9606	pentabrominated diphenyl ether 100 results in decreased expression of ATP6V1E1 protein	decreases^expression	31675489
atp6v1e1	Smoke	D012906		ATP6V1E1	529	Homo sapiens	9606	Smoke results in decreased expression of ATP6V1E1 mRNA	decreases^expression	34520756
atp6v1e1	tanshinone	C021751	568-73-0	ATP6V1E1	529	Homo sapiens	9606	tanshinone results in increased expression of ATP6V1E1 mRNA	increases^expression	15849732
atp6v1e1	tetrabromobisphenol A	C020806	79-94-7	ATP6V1E1	529	Homo sapiens	9606	tetrabromobisphenol A results in decreased expression of ATP6V1E1 protein	decreases^expression	31675489
atp6v1e1	Tetrachlorodibenzodioxin	D013749	1746-01-6	ATP6V1E1	529	Homo sapiens	9606	Tetrachlorodibenzodioxin results in increased expression of ATP6V1E1 mRNA	increases^expression	23152189
atp6v1e1	Tobacco Smoke Pollution	D014028		ATP6V1E1	529	Homo sapiens	9606	Tobacco Smoke Pollution affects the expression of ATP6V1E1 protein	affects^expression	30291989
atp6v1e1	Tobacco Smoke Pollution	D014028		ATP6V1E1	529	Homo sapiens	9606	Tobacco Smoke Pollution results in increased expression of ATP6V1E1 mRNA	increases^expression	33660061
atp6v1e1	Tretinoin	D014212	302-79-4	ATP6V1E1	529	Homo sapiens	9606	Tretinoin results in increased expression of ATP6V1E1 mRNA	increases^expression	33167477
